# Supplementary material for: Polyoxygenated Terpenoids and Polyketides from the Roots of Flueggea virosa and Their Inhibitory Effect against SARS-CoV-2-Induced Inflammation
Source: MDPI journal article supplement (doi:10.3390/molecules27238548), 2022-12-05
Supplement: s1 [file s1]

# Polyoxygenated Terpenoids and Polyketides from the Roots of *Flueggea virosa* and Their Inhibitory Effect against SARS-CoV-2-Induced Inflammation

Ju-Chien Cheng <sup>1,†</sup>, Yi-Ju Chen <sup>2,†</sup>, Chi-Wen Chuang <sup>3</sup>, Ya-Hsuan Chao <sup>1</sup>, Hui-Chi Huang <sup>4</sup>, Chia-Chi Lin <sup>4</sup> and Chih-Hua Chao <sup>3,5,\*</sup>

<sup>1</sup> Department of Medical Laboratory Science and Biotechnology, China Medical University, Taichung 40402, Taiwan

<sup>2</sup> Core Facility Center, Office of Research and Development, Taipei Medical University, Taipei 110301, Taiwan

<sup>3</sup> School of Pharmacy, China Medical University, Taichung 406040, Taiwan

<sup>4</sup> Department of Chinese Pharmaceutical Sciences and Chinese Medicine Resources, China Medical University, Taichung 40402, Taiwan

<sup>5</sup> Chinese Medicine Research and Development Center, China Medical University Hospital, Taichung 404332, Taiwan

\* Correspondence: chchao@mail.cmu.edu.tw; Tel: +886-4-22053366 (ext. 5157); Fax: +886-4-22078083

† These authors contributed equally to this work.

**Figure S1.** (+)-HR-EIMS spectrum of **1**.

**Figure S2.** <sup>1</sup>H NMR spectrum of **1**.

**Figure S3.** <sup>13</sup>C NMR spectrum of **1**.

**Figure S4.** DEPT spectrum of **1**.

**Figure S5.** HSQC spectrum of **1**.

**Figure S6.** HMBC spectrum of **1**.

**Figure S7.** COSY spectrum of **1**.

**Figure S8.** NOESY spectrum of **1**.

**Figure S9.** (–)-HR-APCIMS spectrum of **2**.

**Figure S10.** <sup>1</sup>H NMR spectrum of **2**.

**Figure S11.**  $^{13}\text{C}$  NMR spectrum of **2**.  
**Figure S12.** DEPT spectrum of **2**.  
**Figure S13.** HSQC spectrum of **2**.  
**Figure S14.** HMBC spectrum of **2**.  
**Figure S15.** COSY spectrum of **2**.  
**Figure S16.** NOESY spectrum of **2**.  
**Figure S17.** (–)-HR-ESIMS spectrum of **3**.  
**Figure S18.**  $^1\text{H}$  NMR spectrum of **3**.  
**Figure S19.**  $^{13}\text{C}$  NMR spectrum of **3**.  
**Figure S20.** HSQC spectrum of **3**.  
**Figure S21.** HMBC spectrum of **3**.  
**Figure S22.** COSY spectrum of **3**.  
**Figure S23.** NOESY spectrum of **3**.  
**Figure S24.** (–)-HR-ESIMS spectrum of **4**.  
**Figure S25.**  $^1\text{H}$  NMR spectrum of **4**.  
**Figure S26.**  $^{13}\text{C}$  NMR spectrum of **4**.  
**Figure S27.** DEPT spectrum of **4**.  
**Figure S28.** HSQC spectrum of **4**.  
**Figure S29.** HMBC spectrum of **4**.  
**Figure S30.** COSY spectrum of **4**.  
**Figure S31.** NOESY spectrum of **4**.  
**Figure S32.** (–)-HR-APCIMS spectrum of **5**.  
**Figure S33.**  $^1\text{H}$  NMR spectrum of **5**.  
**Figure S34.**  $^{13}\text{C}$  NMR spectrum of **5**.  
**Figure S35.** DEPT spectrum of **5**.  
**Figure S36.** HSQC spectrum of **5**.  
**Figure S37.** HMBC spectrum of **5**.  
**Figure S38.** COSY spectrum of **5**.  
**Figure S39.** NOESY spectrum of **5**.  
**Figure S40.** (+)-HR-ESIMS spectra of **6**.  
**Figure S41.**  $^1\text{H}$  NMR spectrum of **6**.  
**Figure S42.**  $^{13}\text{C}$  NMR spectrum of **6**.  
**Figure S43.** DEPT spectrum of **6**.  
**Figure S44.** HSQC spectrum of **6**.  
**Figure S45.** HMBC spectrum of **6**.  
**Figure S46.** COSY spectrum of **6**.  
**Figure S47.** NOESY spectrum of **6**.  
**Figure S48.** Possible candidates of compounds **1**, **2**, and **6** for DP4+ probability

analysis.

**Figure S49.** H-6/H-7 distance of 6 $\alpha$ -OH and 6 $\beta$ -OH possible candidates of compound **2**. Conformers were generated by MM2 energy minimizations.

**Table S1.** DP4+ analysis table for compound **1** (isomer 1: 3 $\beta$ -OH; isomer 2: 3 $\alpha$ -OH).

**Table S2.** Conformers and Boltzmann populations of 3 $\alpha$ -OH isomer of **1**.

**Table S3.** Conformers and Boltzmann populations of 3 $\beta$ -OH isomer of **1**.

**Table S4.** DP4+ analysis table for compound **2** (isomer 1: 6 $\alpha$ -OH; isomer 2: 6 $\beta$ -OH).

**Table S5.** Conformers and Boltzmann populations of 6 $\alpha$ -OH isomer of **2**.

**Table S6.** Conformers and Boltzmann populations of 6 $\beta$ -OH isomer of **2**.

**Table S7.** DP4+ analysis table for compound **6** (isomer 1: 2 $\alpha$ ,10 $\alpha$ -OH; isomer 2: 2 $\beta$ ,10 $\alpha$ -OH; isomer 3: 2 $\alpha$ ,10 $\beta$ -OH; isomer 4: 2 $\beta$ ,10 $\beta$ -OH).

**Table S8.** Conformers and Boltzmann populations of 2 $\alpha$ ,10 $\alpha$ -OH isomer of **6**.

**Table S9.** Conformers and Boltzmann populations of 2 $\beta$ ,10 $\alpha$ -OH isomer of **6**.

**Table S10.** Conformers and Boltzmann populations of 2 $\alpha$ ,10 $\beta$ -OH isomer of **6**.

**Table S11.** Conformers and Boltzmann populations of 2 $\beta$ ,10 $\beta$ -OH isomer of **6**.

**Table S12.** <sup>1</sup>H NMR spectroscopic data of compounds **1–6**.

```

LIST: hei2124_fvcl17k1g3-c3          30-Dec-18 REG    : 02:58.5    #9
Samp:                               Start : 09:24:49  9104
Mode: EI +VE +LMR  ESCAN (EXP) UP HR NRM
Oper:                               Inlet :
Limt: (  0)
      : (422) C24.H38.O6
Peak: 1000.00 mmu    R+D: -2.0 > 60.0
Data: +/-519>575  (CMASS : converted |CMASS : converted |CMASS : conve

```

| Mass     | Intensity | %RA   | Flags | Delta (mmu) | R+D | Composition |
|----------|-----------|-------|-------|-------------|-----|-------------|
| 314.1524 | 428258    | 95.72 | #     | -0.6        | 9.0 | C19.H22.O4  |

**Figure S1.** (+)-HR-EIMS spectrum of **1**.

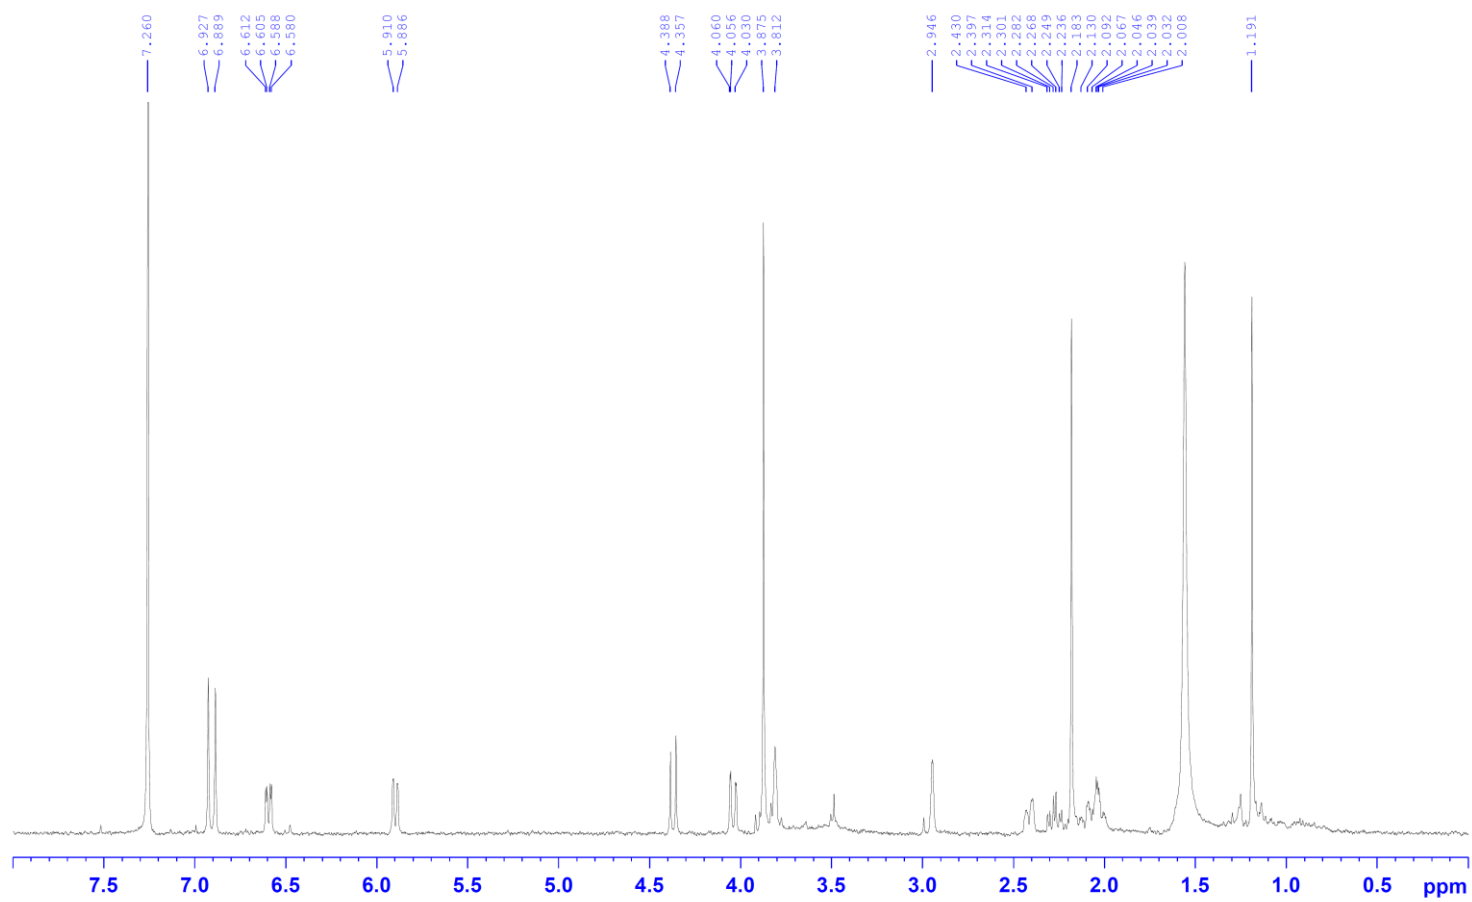

**Figure S2.** <sup>1</sup>H NMR spectrum of **1**.

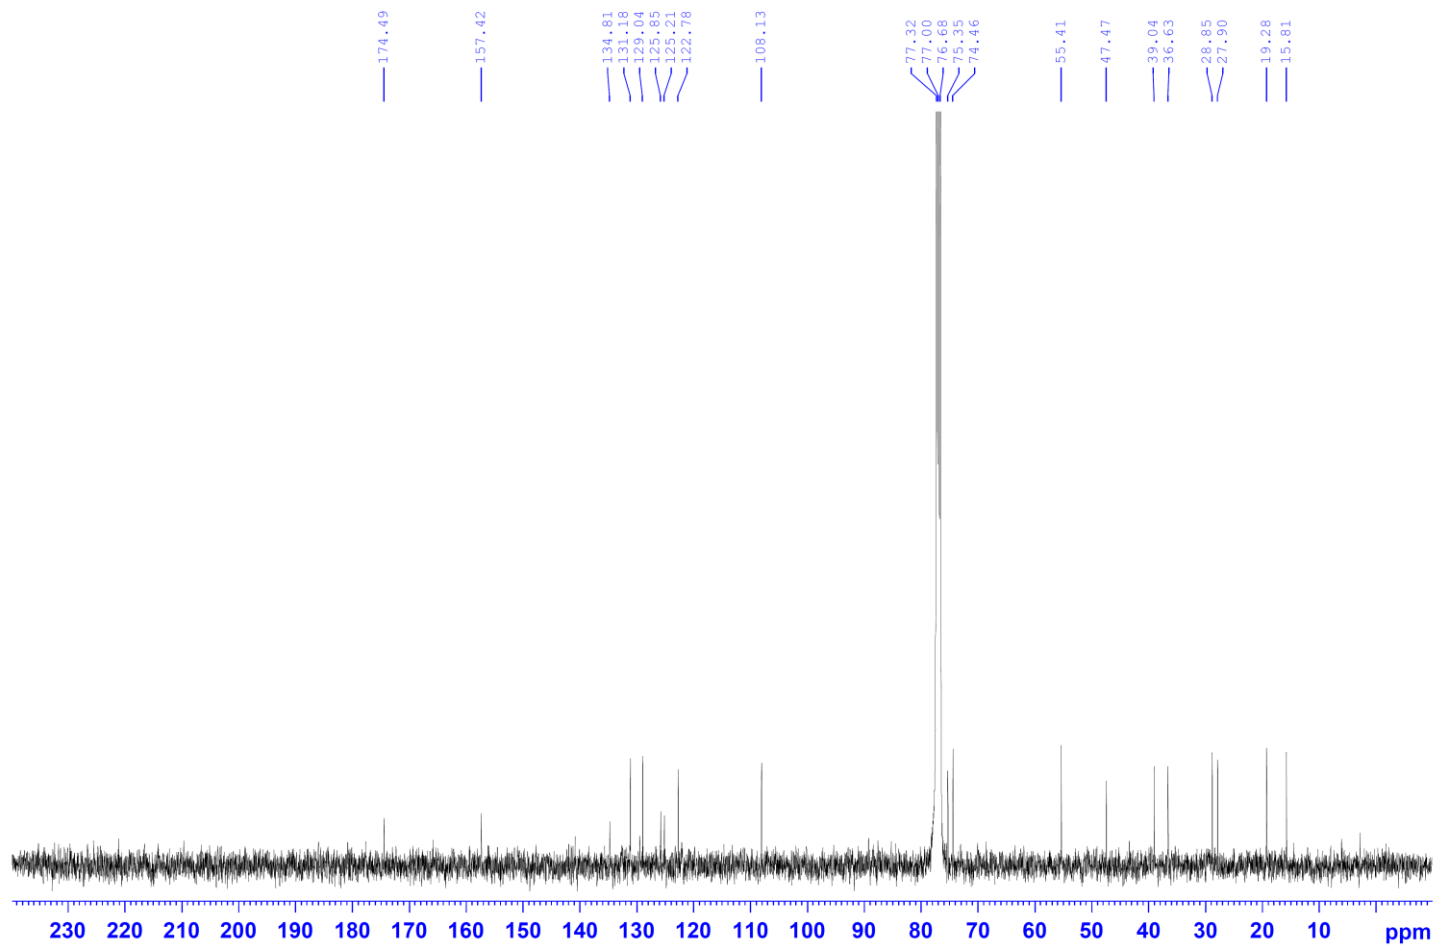

**Figure S3.** <sup>13</sup>C NMR spectrum of **1**.

DEPT-135 spectrum of sample in solvent at Av400 DUAL, CMC

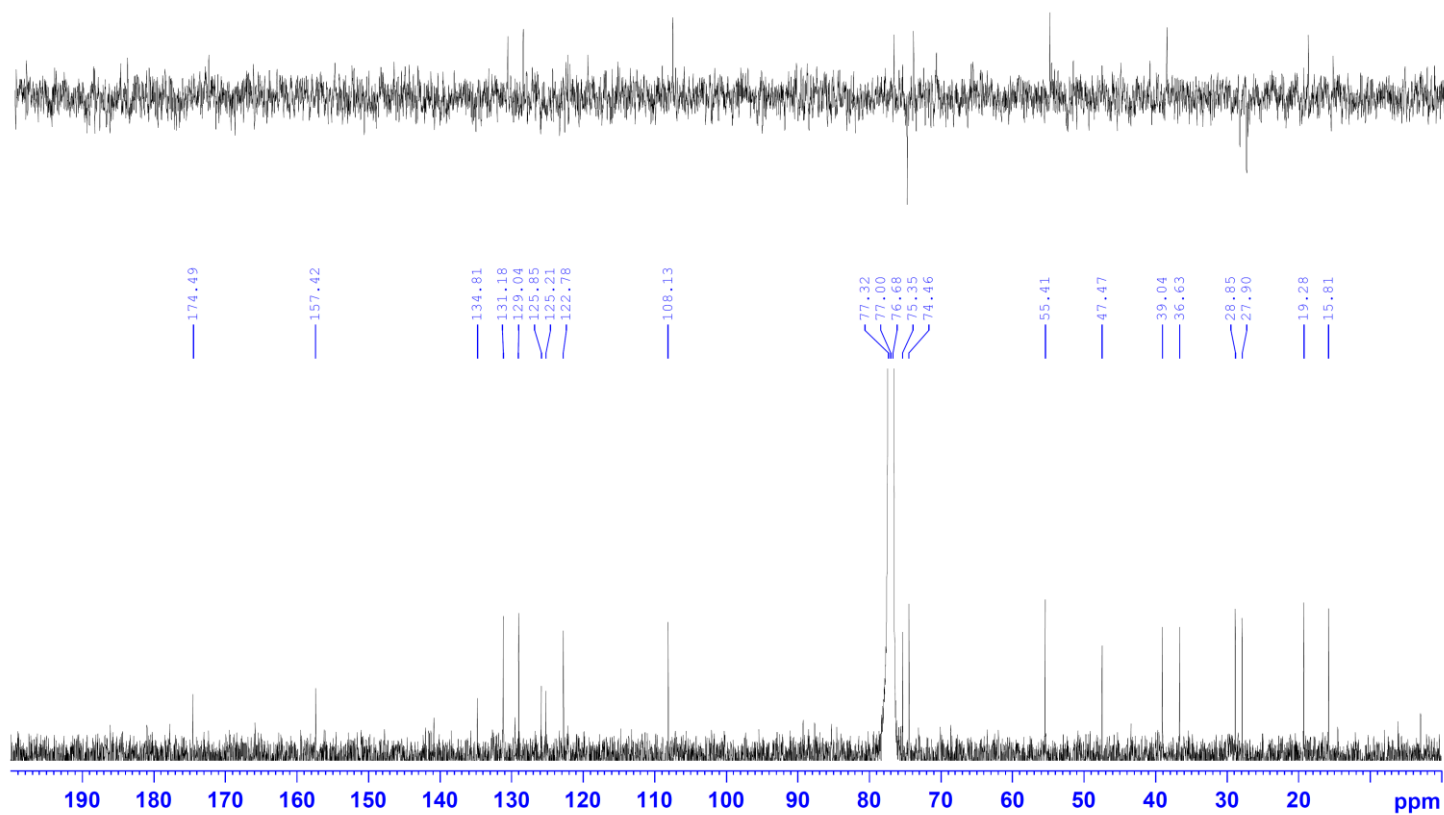

**Figure S4.** DEPT spectrum of **1**.

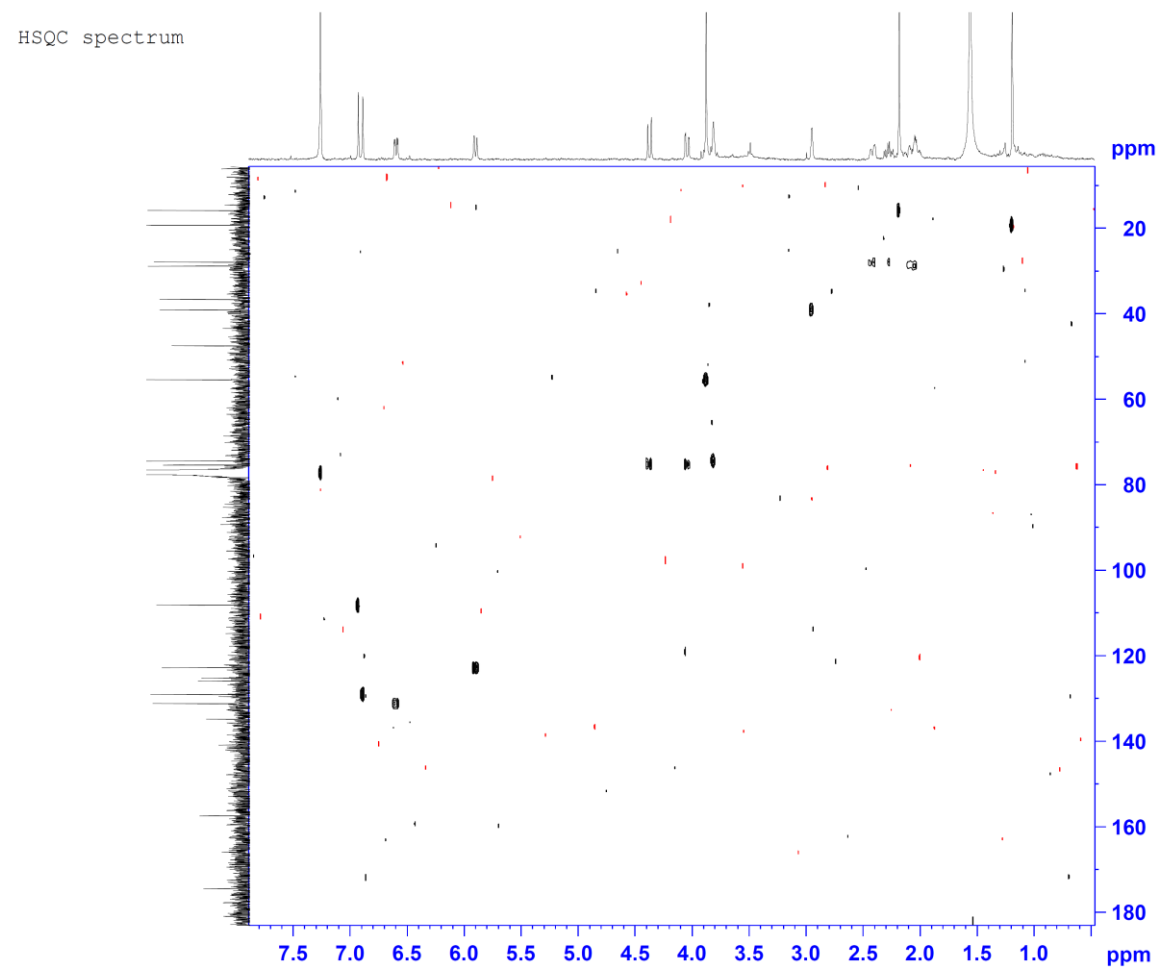

**Figure S5.** HSQC spectrum of **1**.



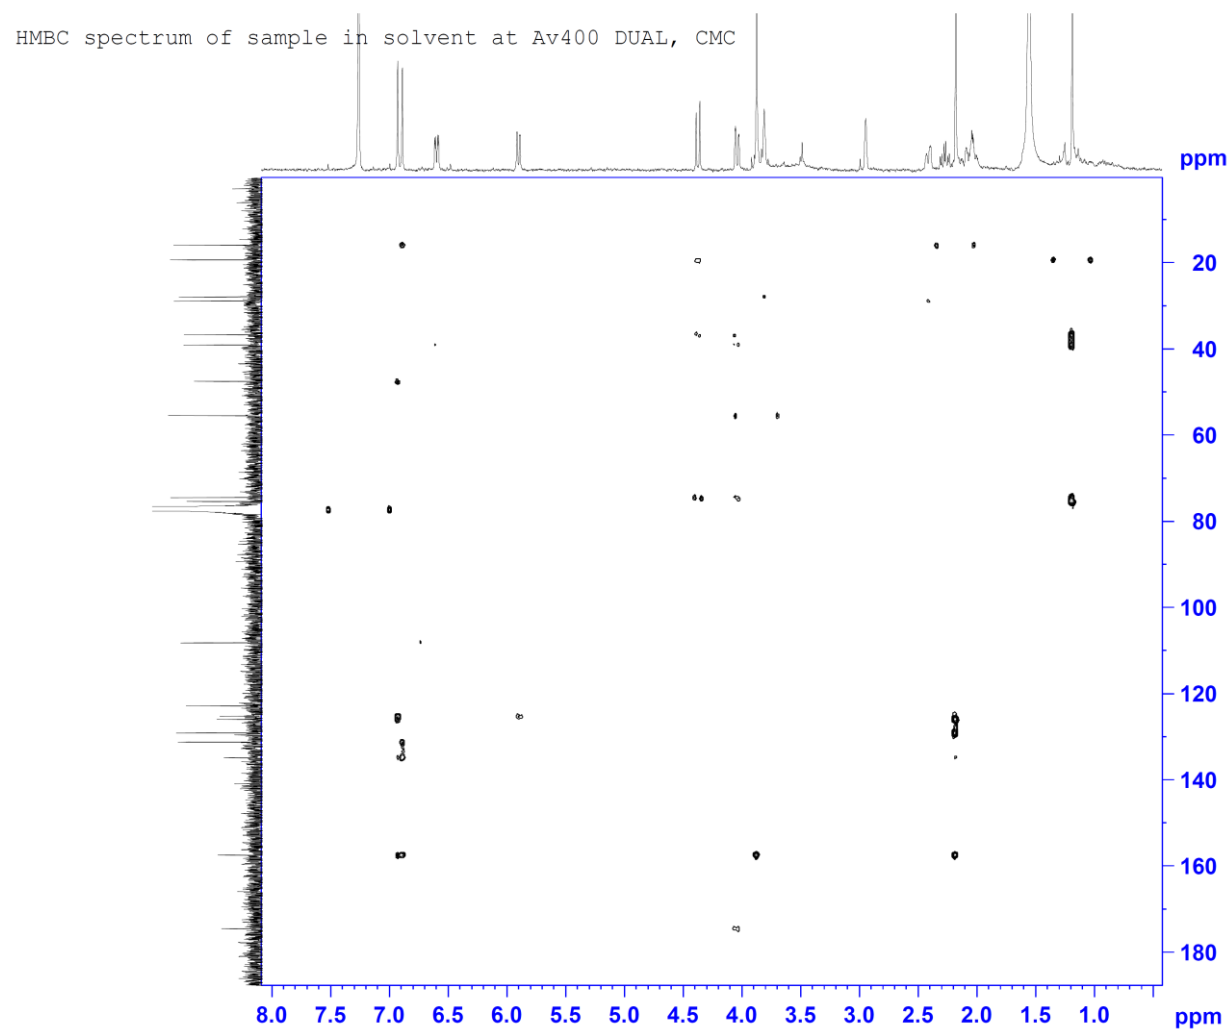

**Figure S6.** HMBC spectrum of **1**.

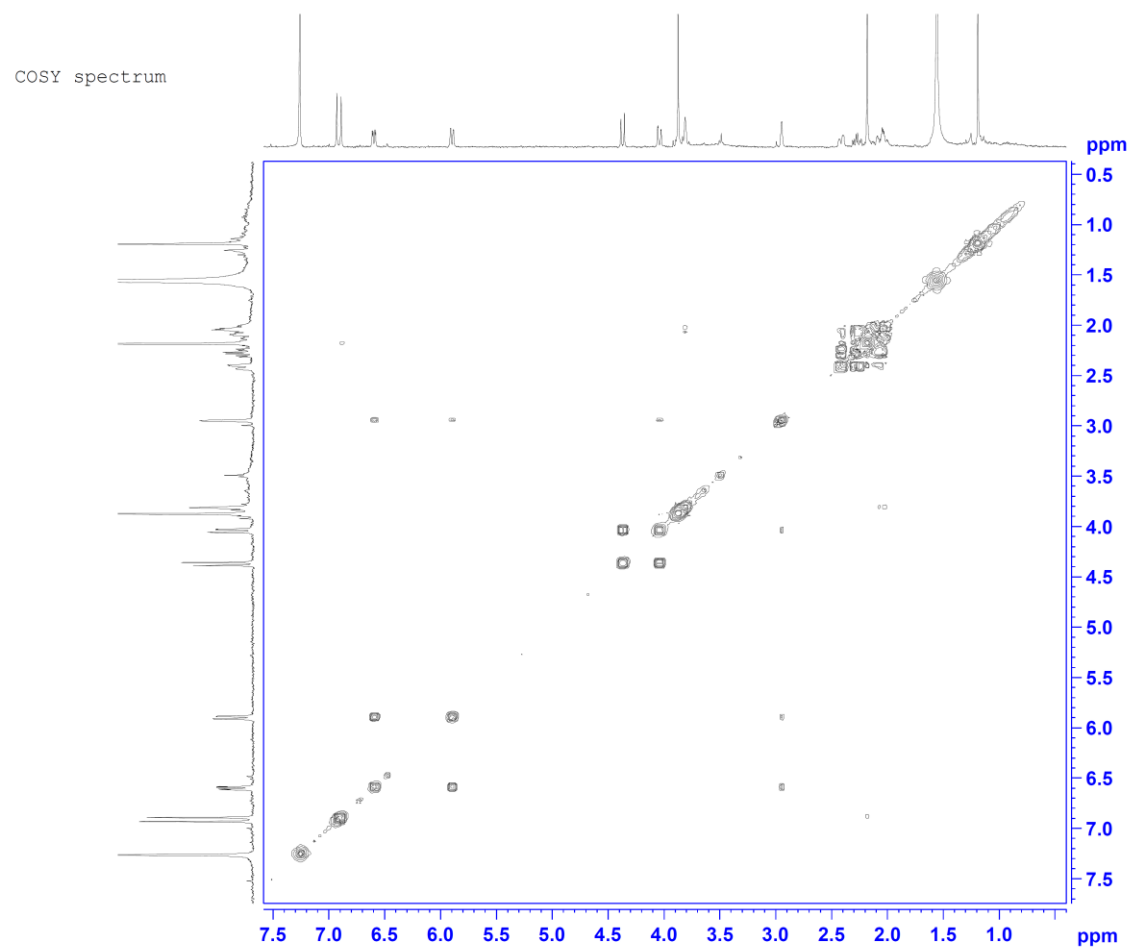

**Figure S7.** COSY spectrum of **1**.

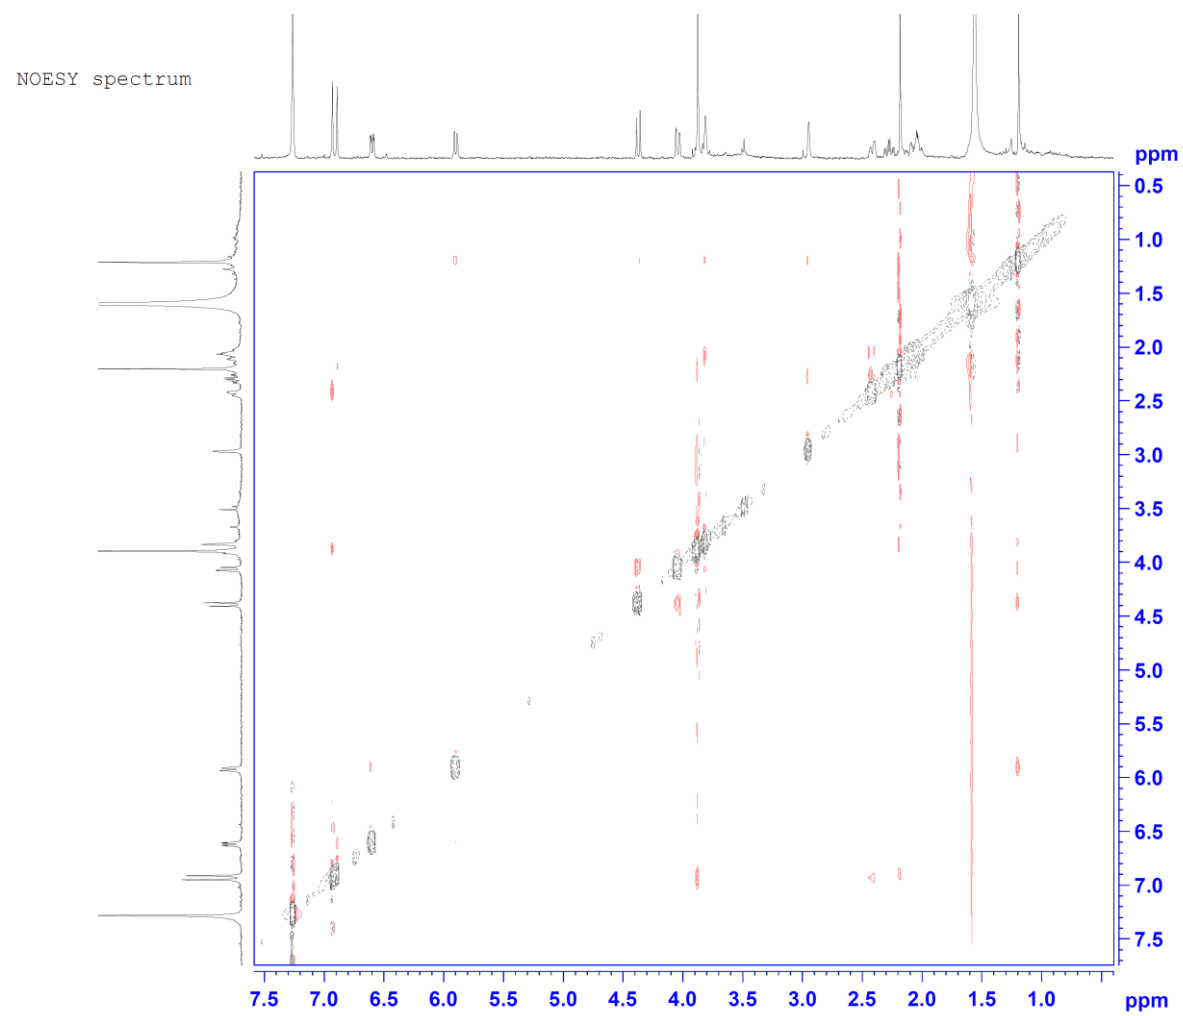

**Figure S8.** NOESY spectrum of **1**.

F:\Exp\_data\...\85-FV-CI-17K1D2-APCI-H

2017/9/26 下午 05:18:08

85-FV-CI-17K1D2-APCI-H#1-20 RT: 0.01-0.53 AV: 20

T: FTMS - p APCI corona Full ms [250.00-400.00]

m/z= 317.1718-317.1777

Isotope Min Max

O-16 0 4

C-12 0 19

H-1 0 27

Charge 1

Mass tolerance 1000.00 ppm

Nitrogen rule not used

RDB equiv -1.00-100.00

max results 1

| m/z      | Intensity | Relative | Theo.<br>Mass | Delta<br>(ppm) | Composition                                    |
|----------|-----------|----------|---------------|----------------|------------------------------------------------|
| 317.1748 | 113607.6  | 100.00   | 317.1747      | 0.15           | C <sub>19</sub> H <sub>25</sub> O <sub>4</sub> |

**Figure S9.** (–)-HR-APCIMS spectrum of **2**.

FV-C1-17K1D2 in CDCl<sub>3</sub> 500 MHz NMR

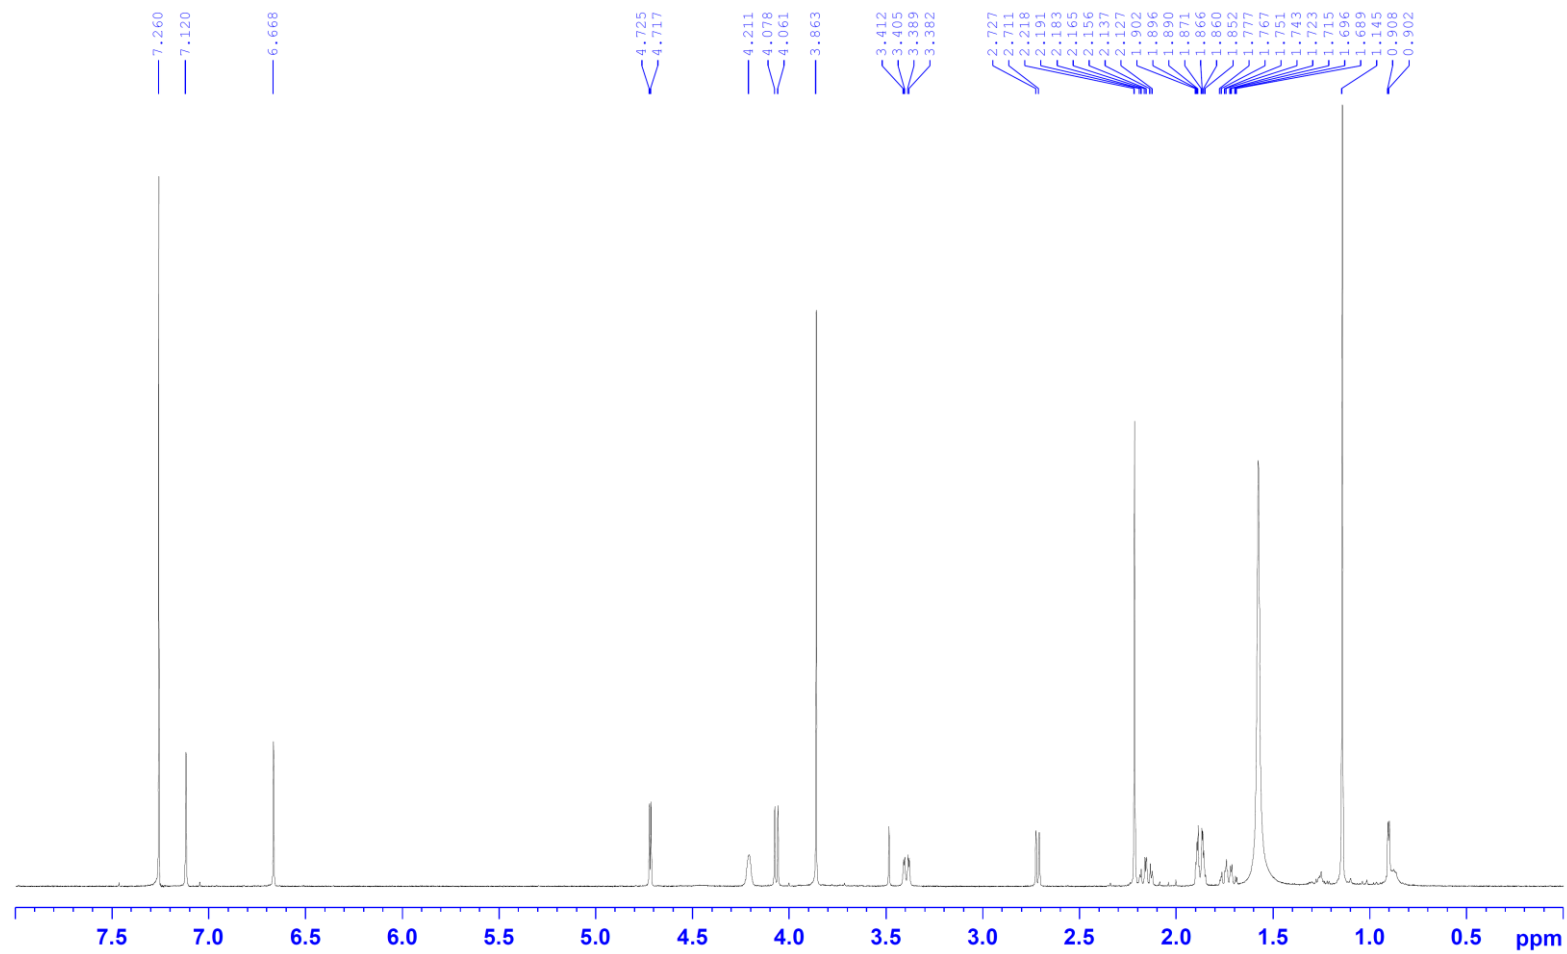

Figure S10. <sup>1</sup>H NMR spectrum of 2.

$^{13}\text{C}$

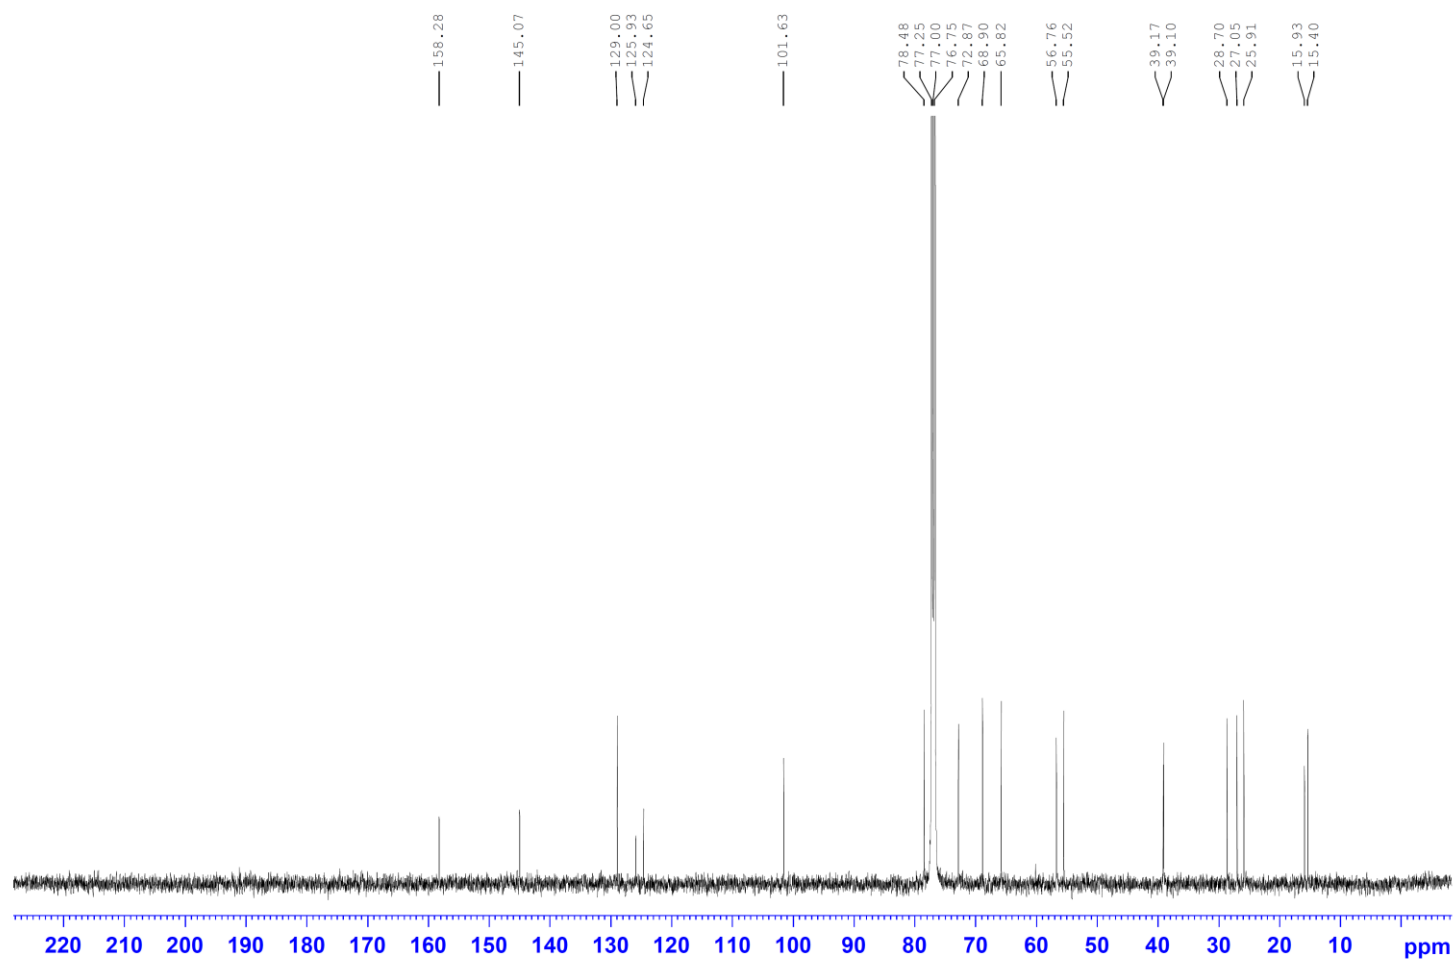

**Figure S11.**  $^{13}\text{C}$  NMR spectrum of **2**.

DEPT

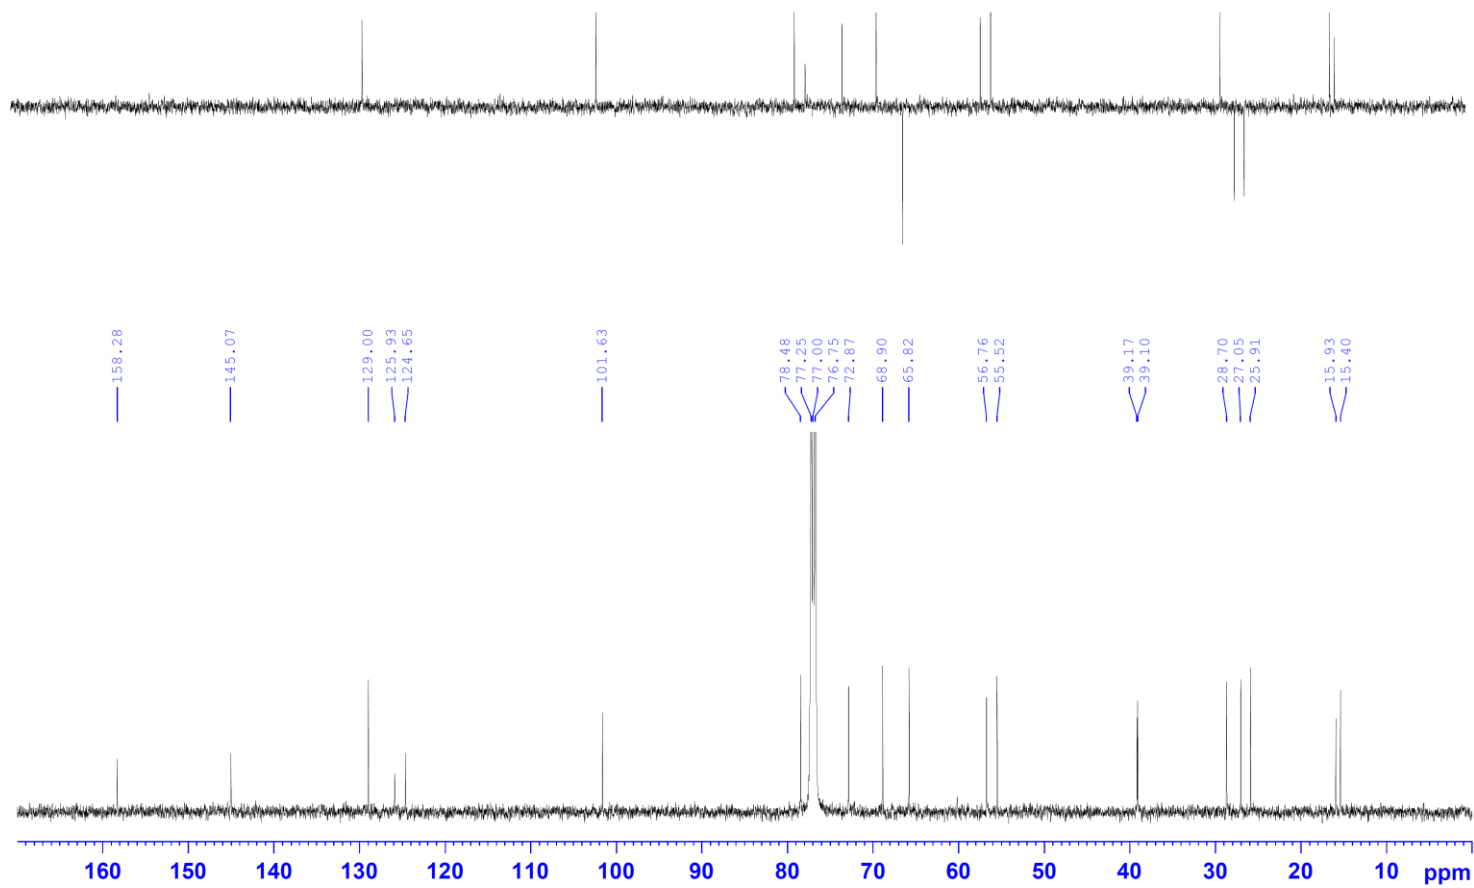

Figure S12. DEPT spectrum of 2.

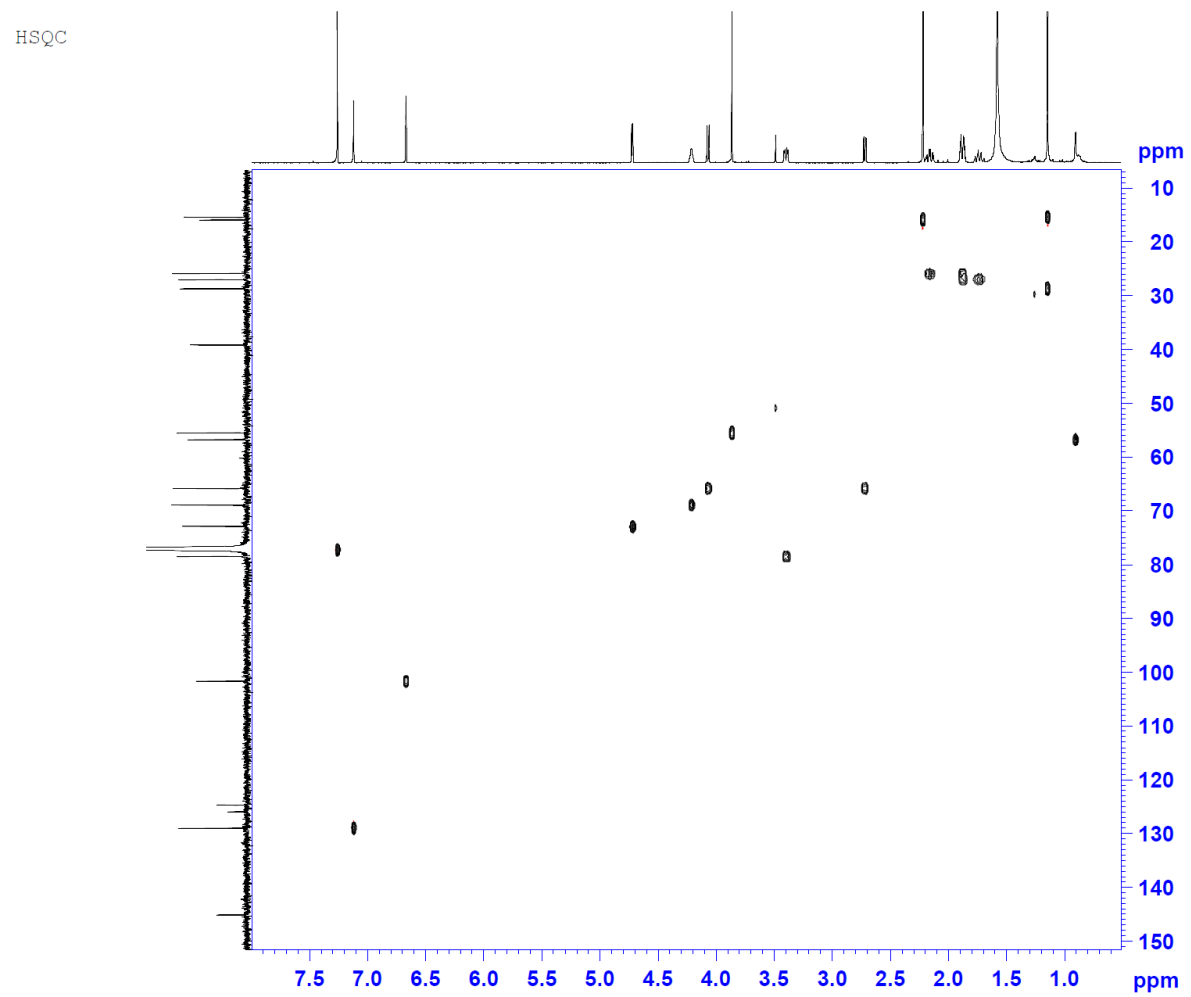

**Figure S13.** HSQC spectrum of **2**.



HMBC

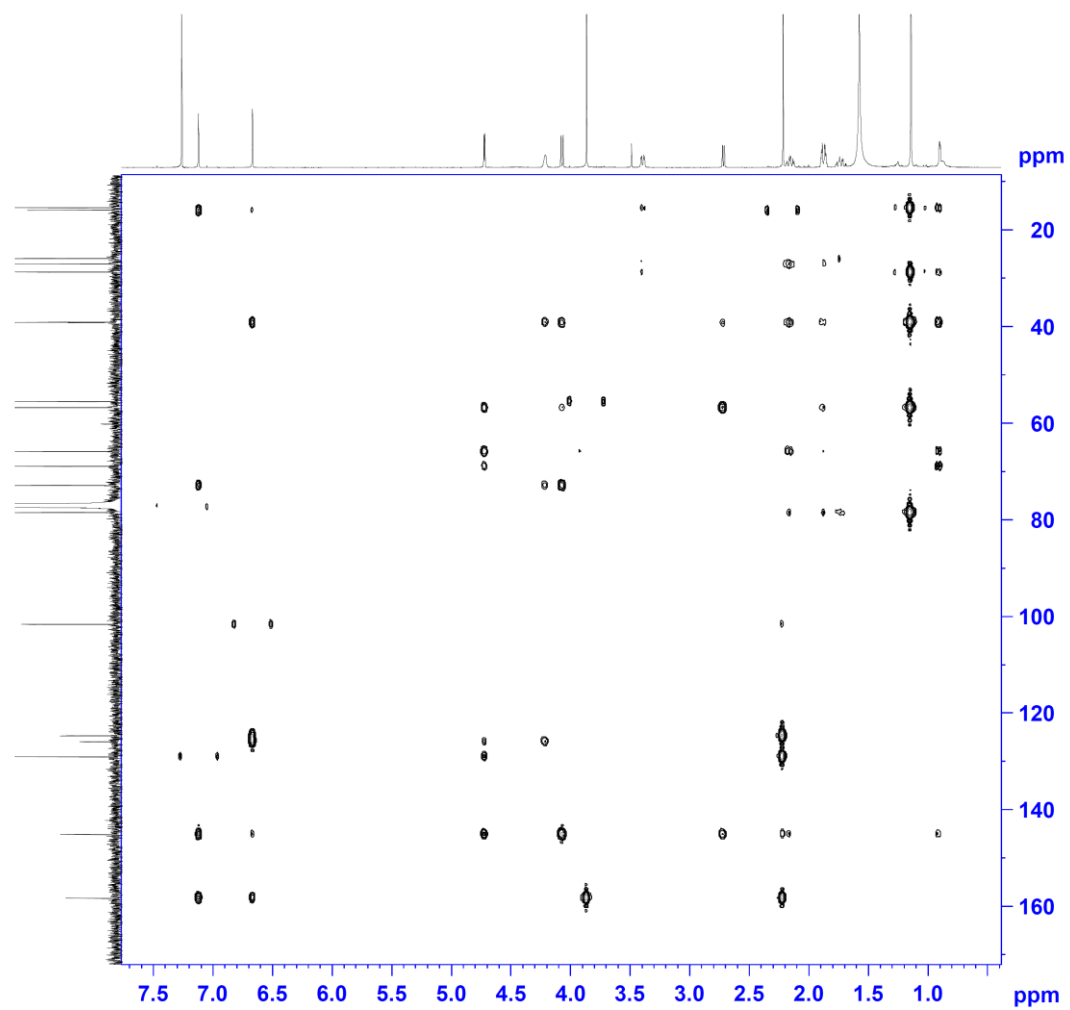

**Figure S14.** HMBC spectrum of **2**.

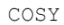

**Figure S15.** COSY spectrum of **2**.

NOESY

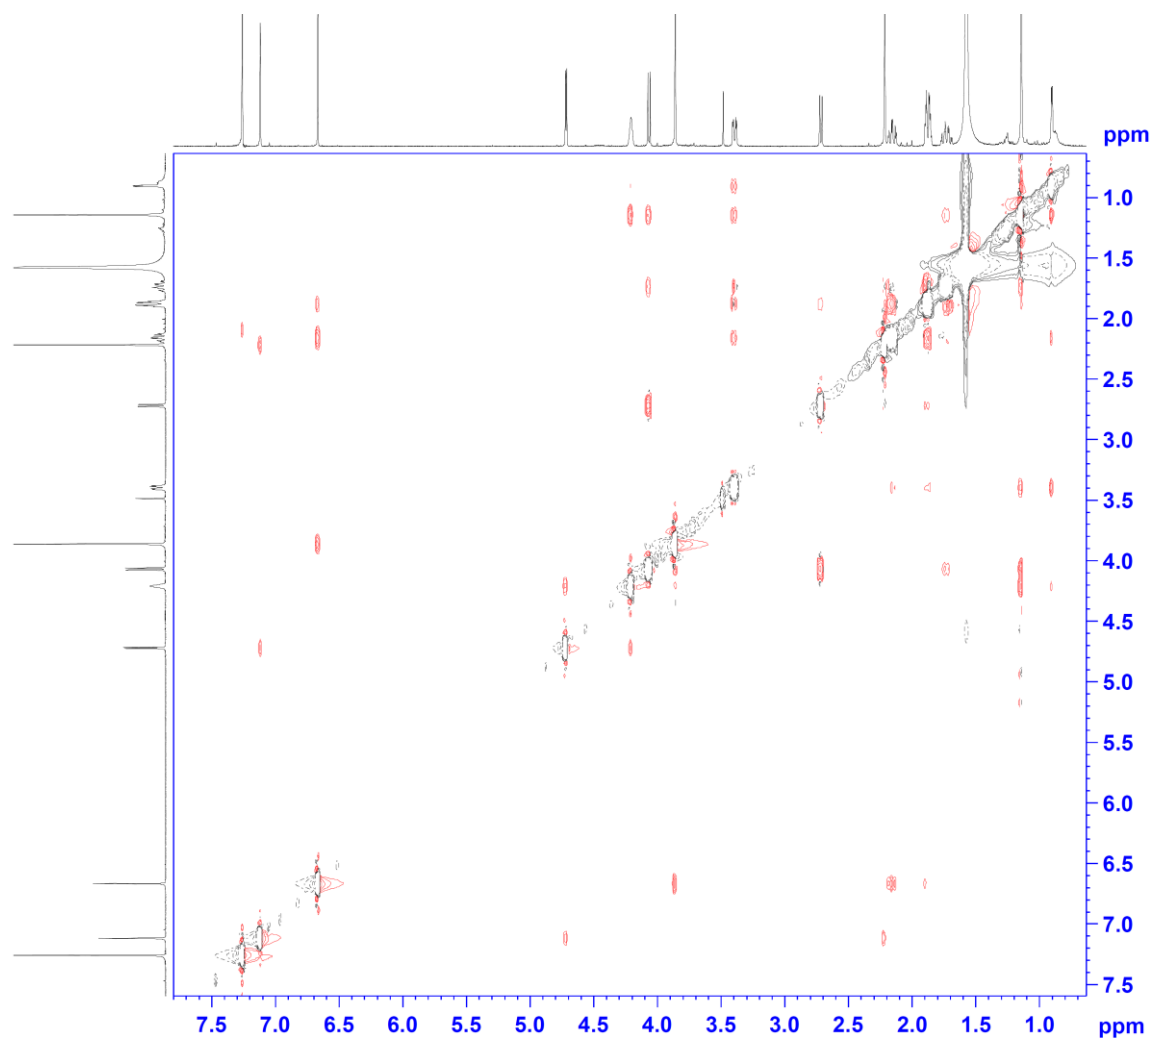

**Figure S16.** NOESY spectrum of **2**.

F:\Exp\_data\...\51-FV-CI-17J3D-H

2017/9/20 上午 11:31:15

51-FV-CI-17J3D-H#1-20 RT: 0.01-0.53 AV: 20

T: FTMS - p ESI Full ms [310.00-325.00]

m/z= 317.1416-317.2115

Isotope Min Max

O-16 0 4

C-12 0 19

H-1 0 27

Charge 1

Mass tolerance 1000.00 ppm

Nitrogen rule not used

RDB equiv -1.00-100.00

max results 1

| m/z      | Intensity | Relative | Theo.<br>Mass | Delta<br>(ppm) | Composition                                    |
|----------|-----------|----------|---------------|----------------|------------------------------------------------|
| 317.1753 | 3564591.0 | 100.00   | 317.1747      | 1.90           | C <sub>19</sub> H <sub>25</sub> O <sub>4</sub> |

**Figure S17.** (–)-HR-ESIMS spectrum of **3**.

FV-C1-17J3D in CDCl<sub>3</sub> 500 MHz NMR

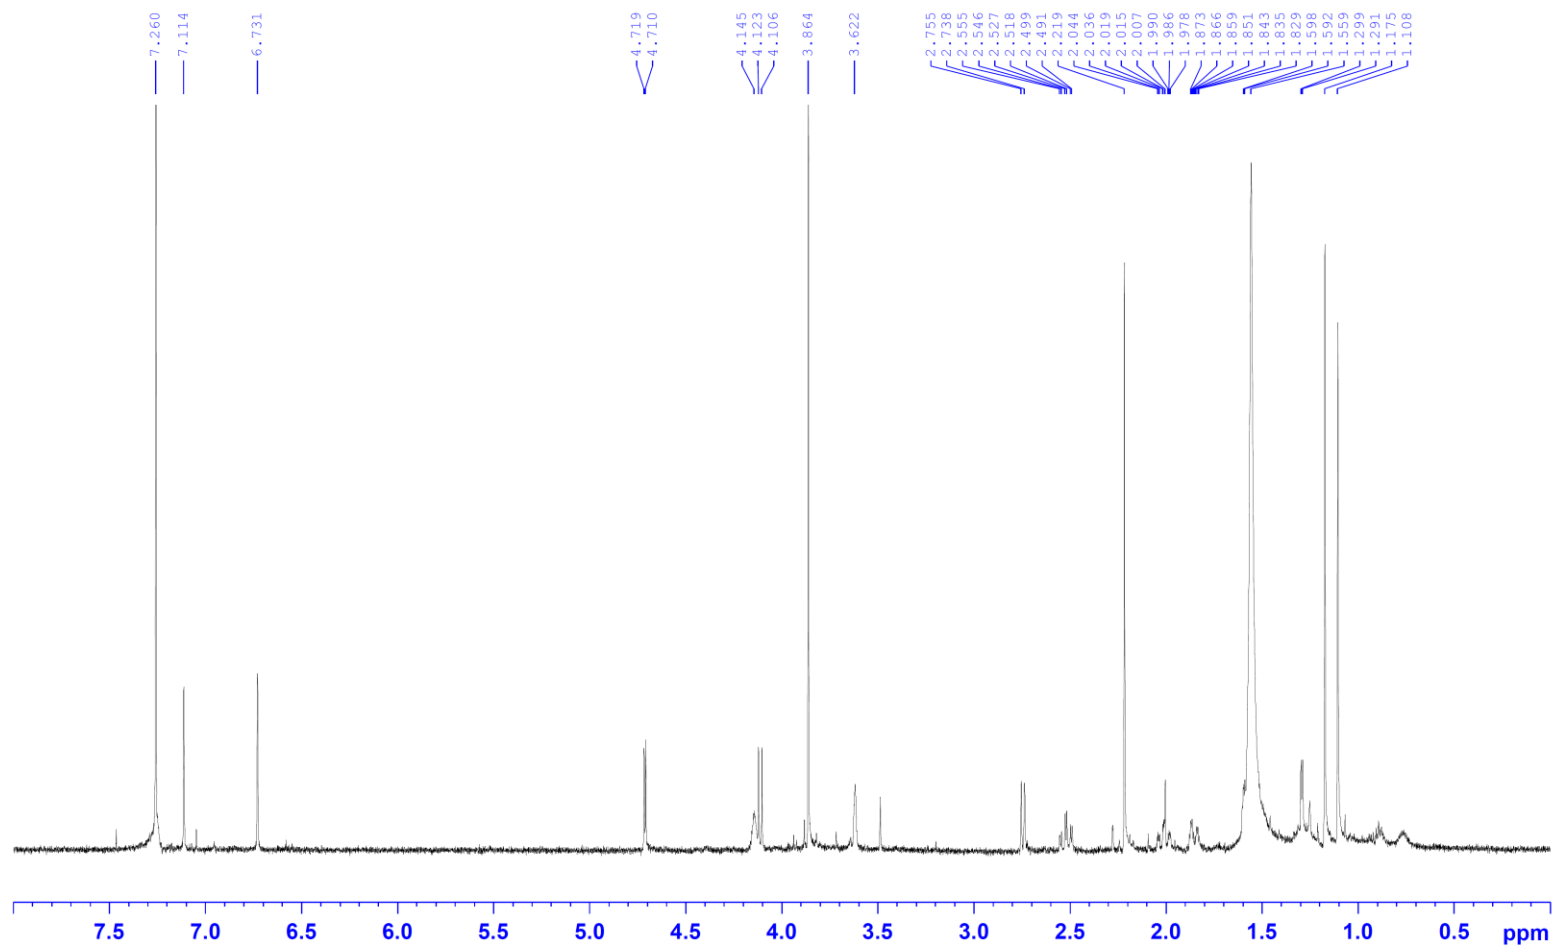

Figure S18. <sup>1</sup>H NMR spectrum of 3.

FV-C1-17J3D in CDCl<sub>3</sub> 500 MHz NMR

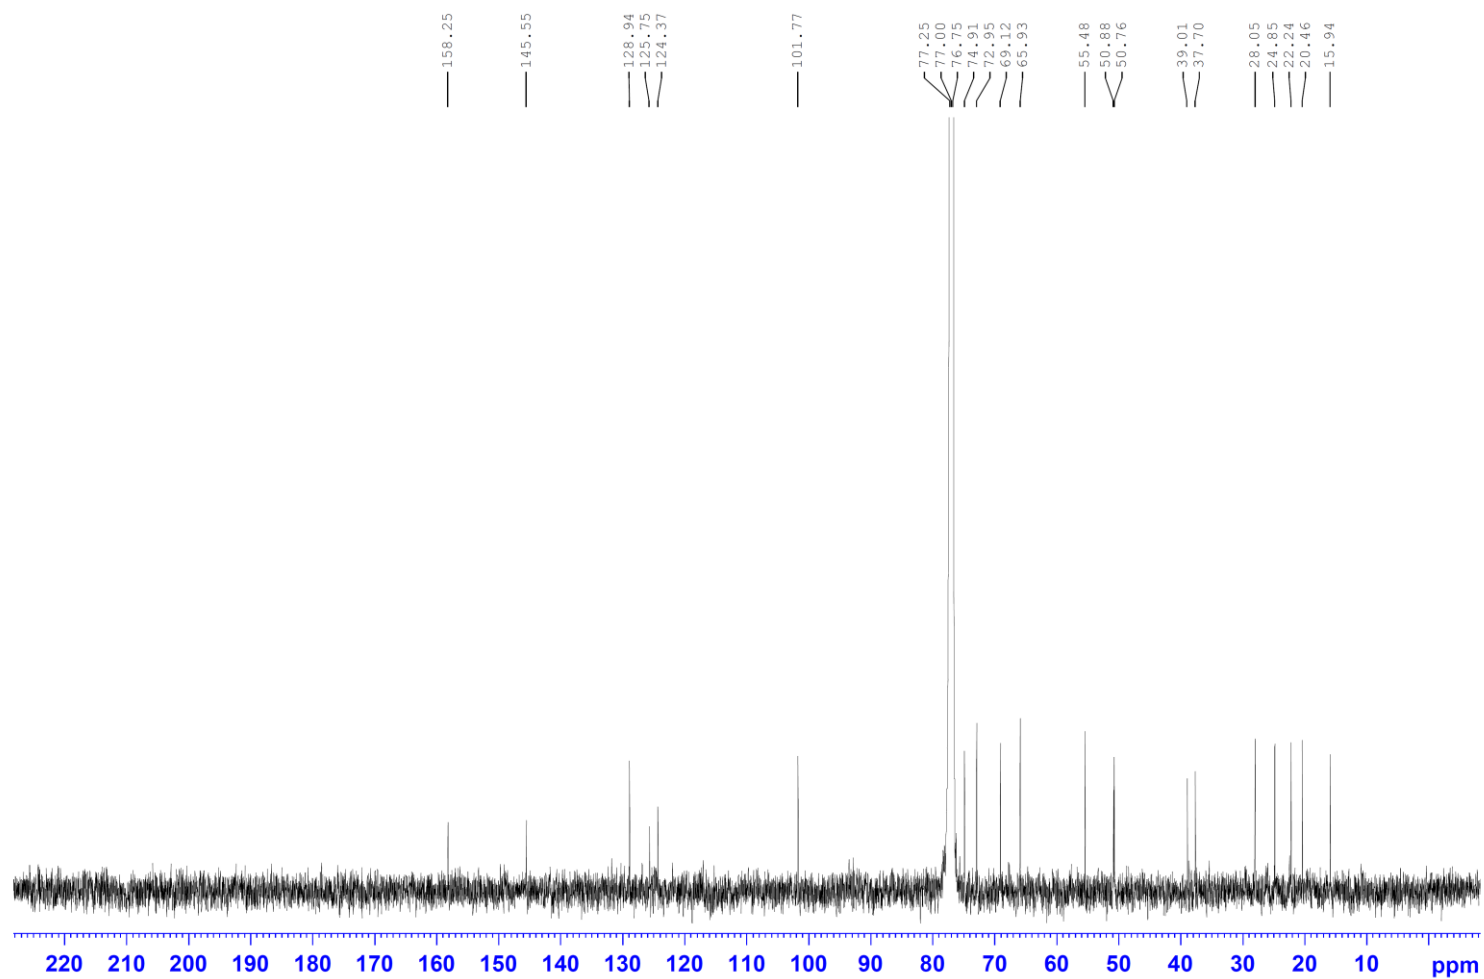

**Figure S19.** <sup>13</sup>C NMR spectrum of **3**.

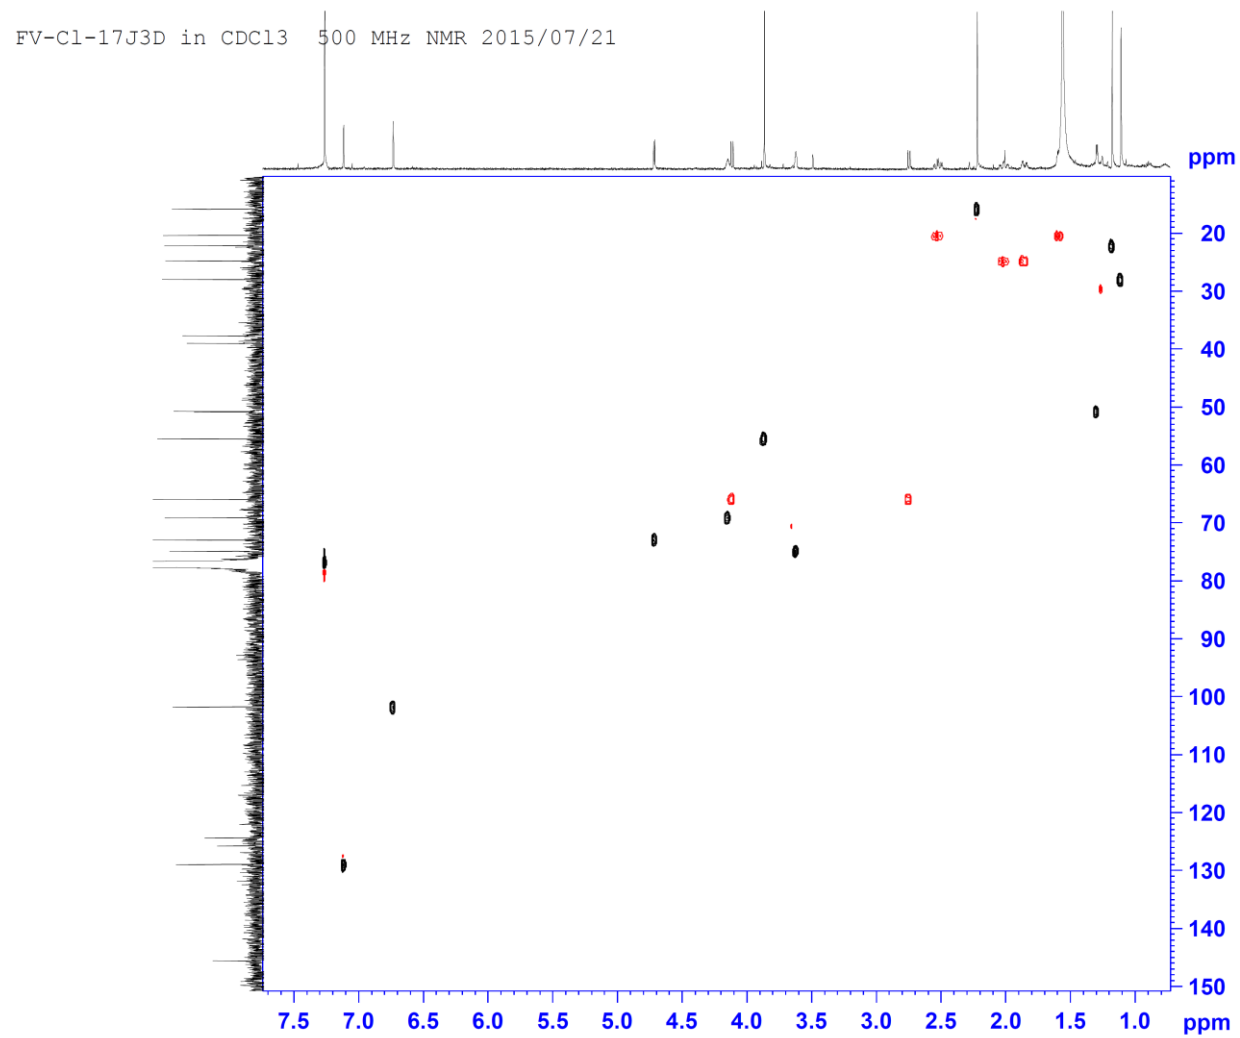

**Figure S20.** HSQC spectrum of **3**.

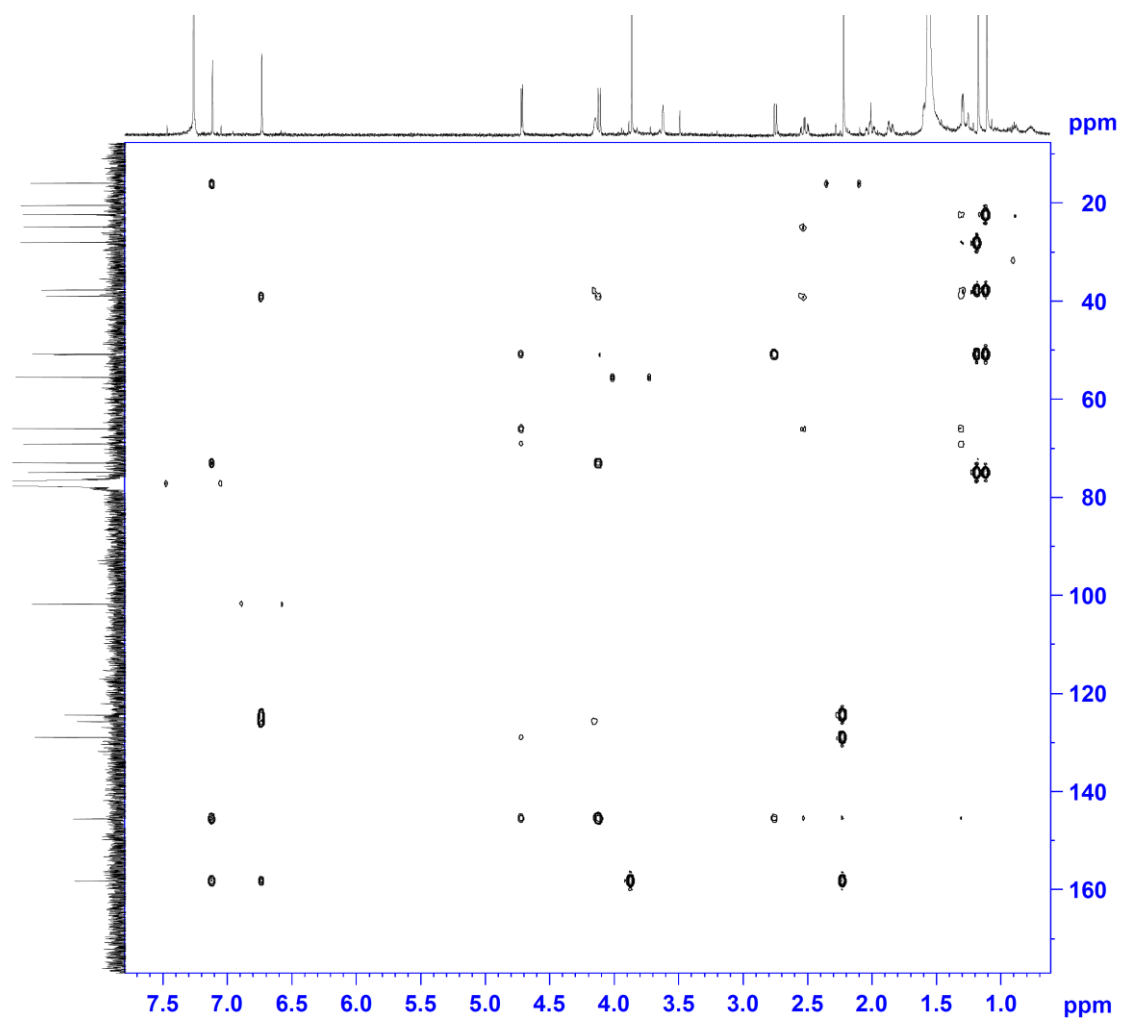

**Figure S21.** HMBC spectrum of **3**.



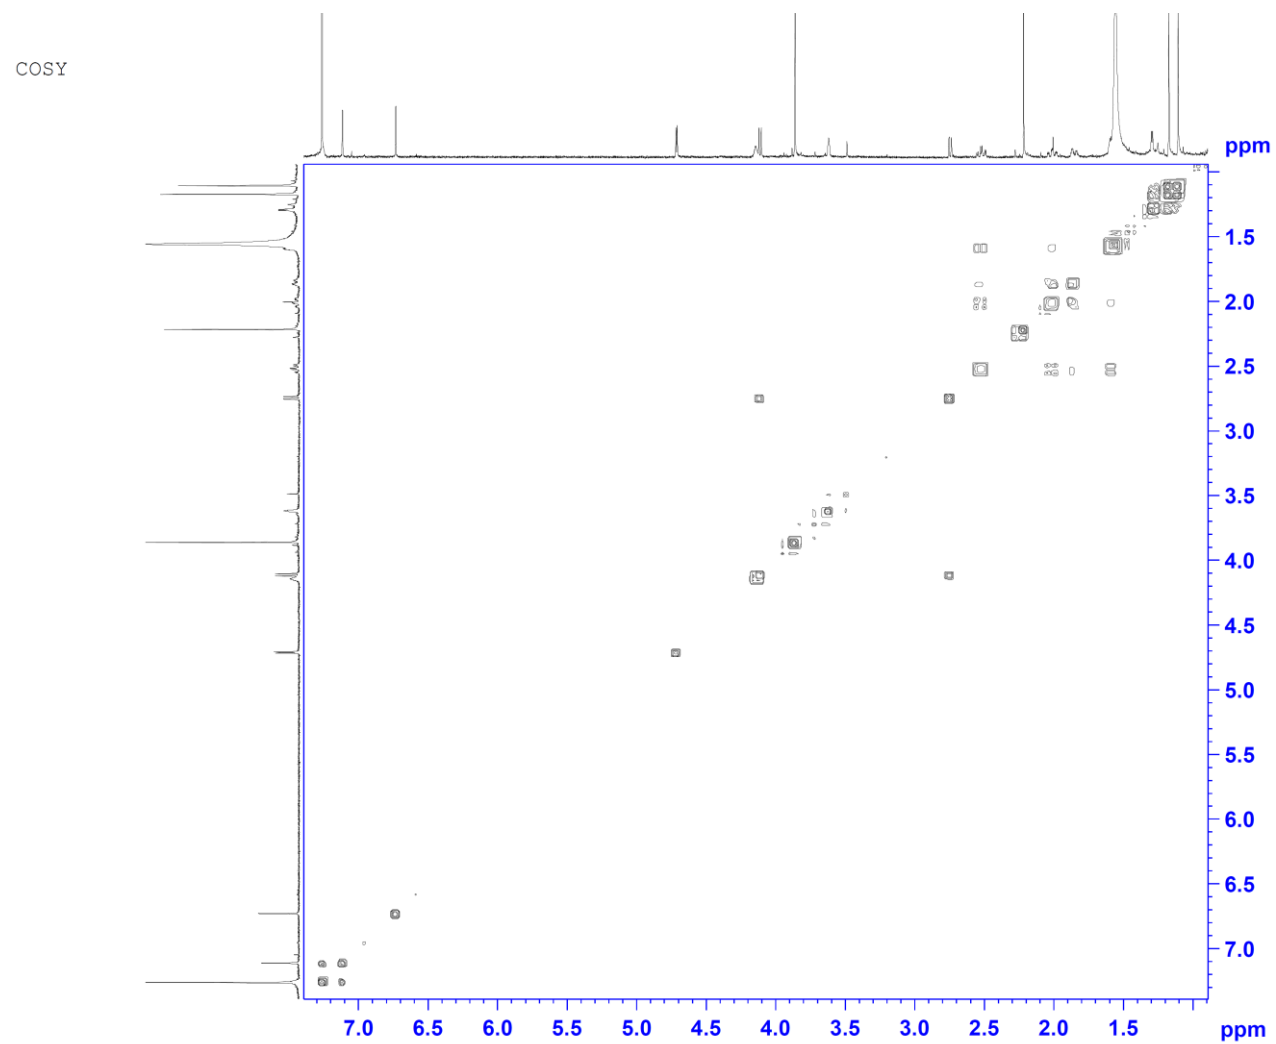

**Figure S22.** COSY spectrum of **3**.

NOESY

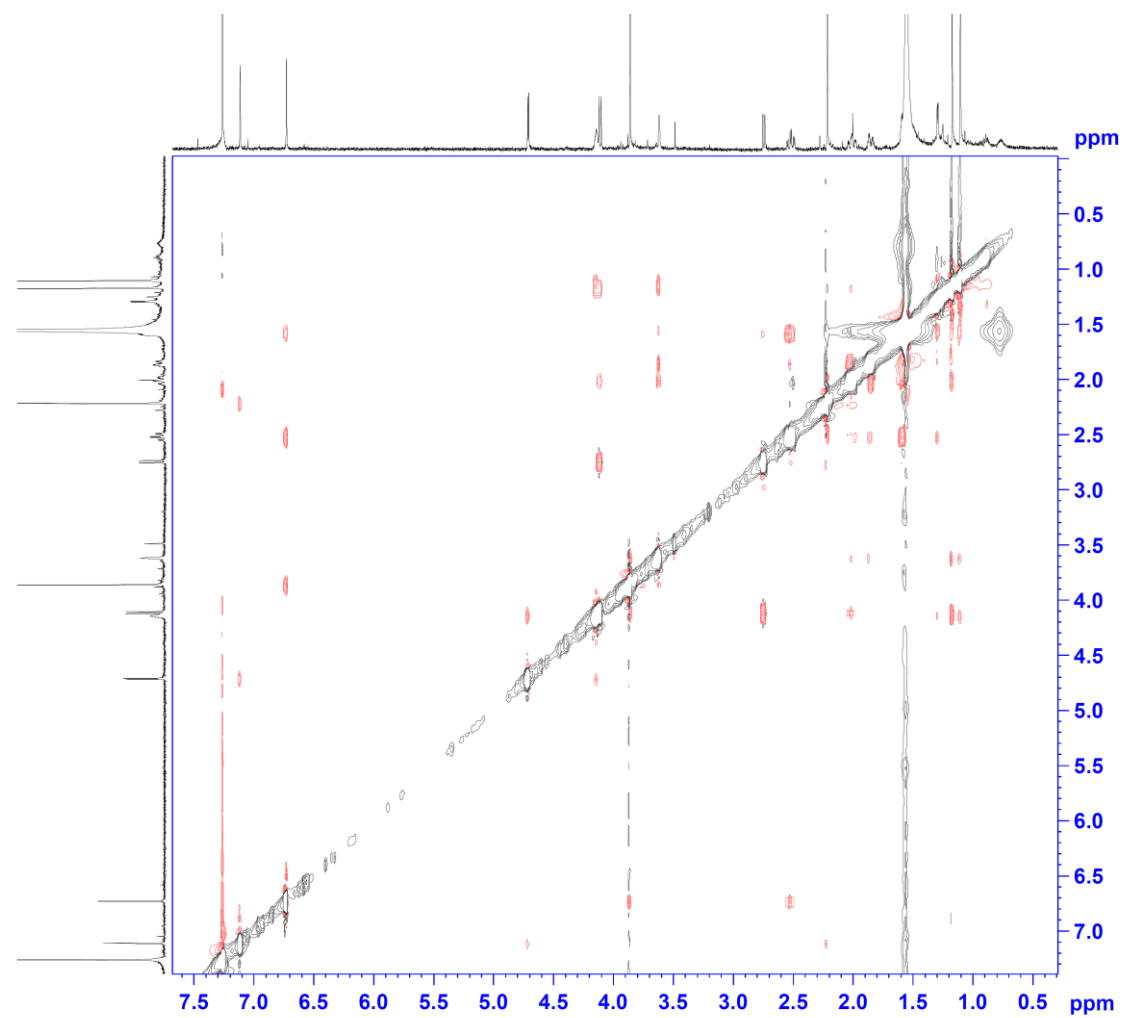

**Figure S23.** NOESY spectrum of **3**.

F:\Exp\_data\...\80-FV-CI-17K1L-H

2017/9/19 下午 03:51:33

80-FV-CI-17K1L-H#1-20 RT: 0.02-0.54 AV: 20

T: FTMS - p ESI Full ms [300.00-350.00]

m/z= 335.1955-335.2456

Isotope Min Max

O-16 0 4

C-12 0 20

H-1 0 33

Charge 1

Mass tolerance 1000.00 ppm

Nitrogen rule not used

RDB equiv -1.00-100.00

max results 1

| m/z      | Intensity | Relative | Theo.<br>Mass | Delta<br>(ppm) | Composition                                    |
|----------|-----------|----------|---------------|----------------|------------------------------------------------|
| 335.2221 | 5521533.5 | 100.00   | 335.2217      | 1.27           | C <sub>20</sub> H <sub>31</sub> O <sub>4</sub> |

**Figure S24.** (–)-HR-ESIMS spectrum of **4**.

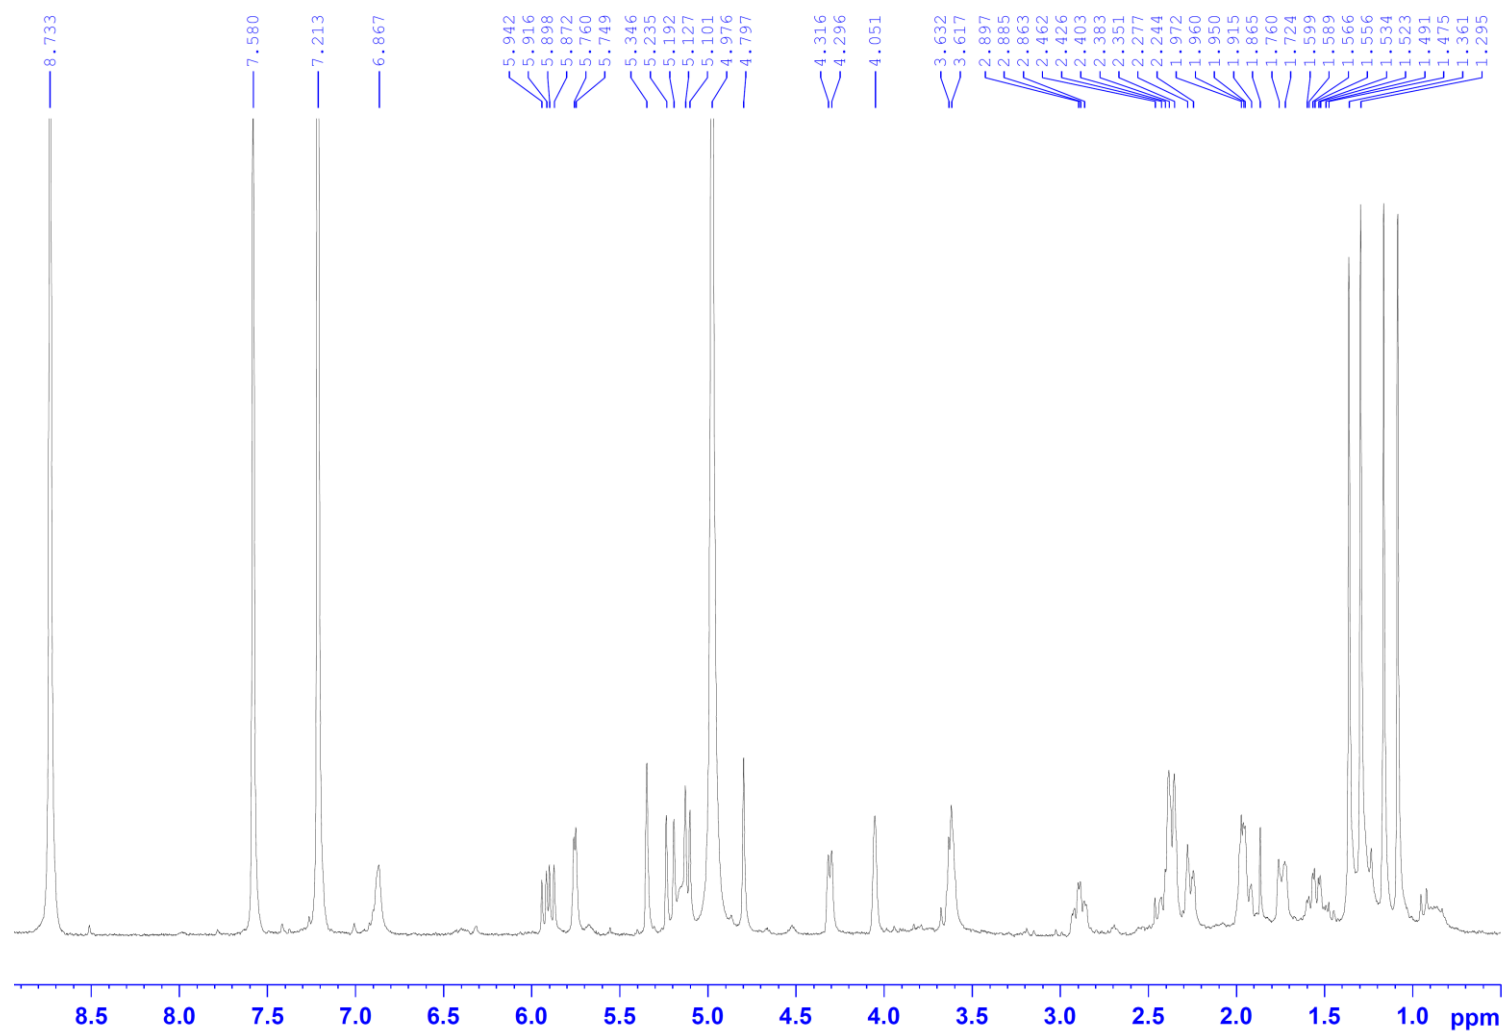

Figure S25. <sup>1</sup>H NMR spectrum of 4.

C13 spectrum of sample in solvent at Av400 DUAL, CMC

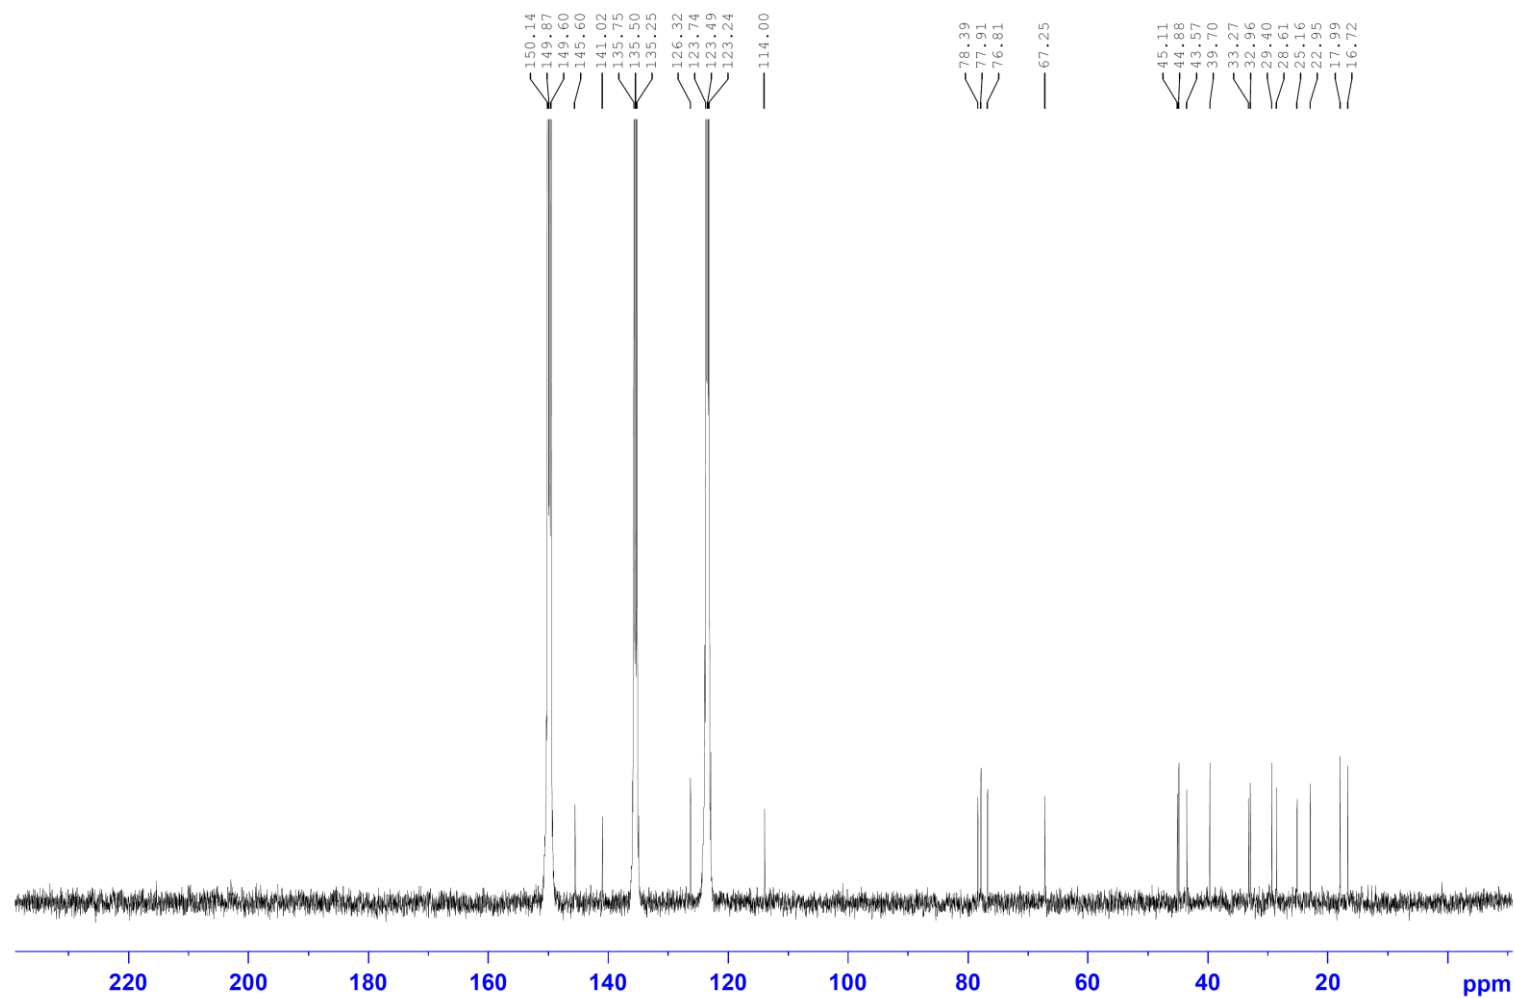

Figure S26.  $^{13}\text{C}$  NMR spectrum of **4**.

DEPT-135 spectrum of sample in solvent at Av400 DUAL, CMC

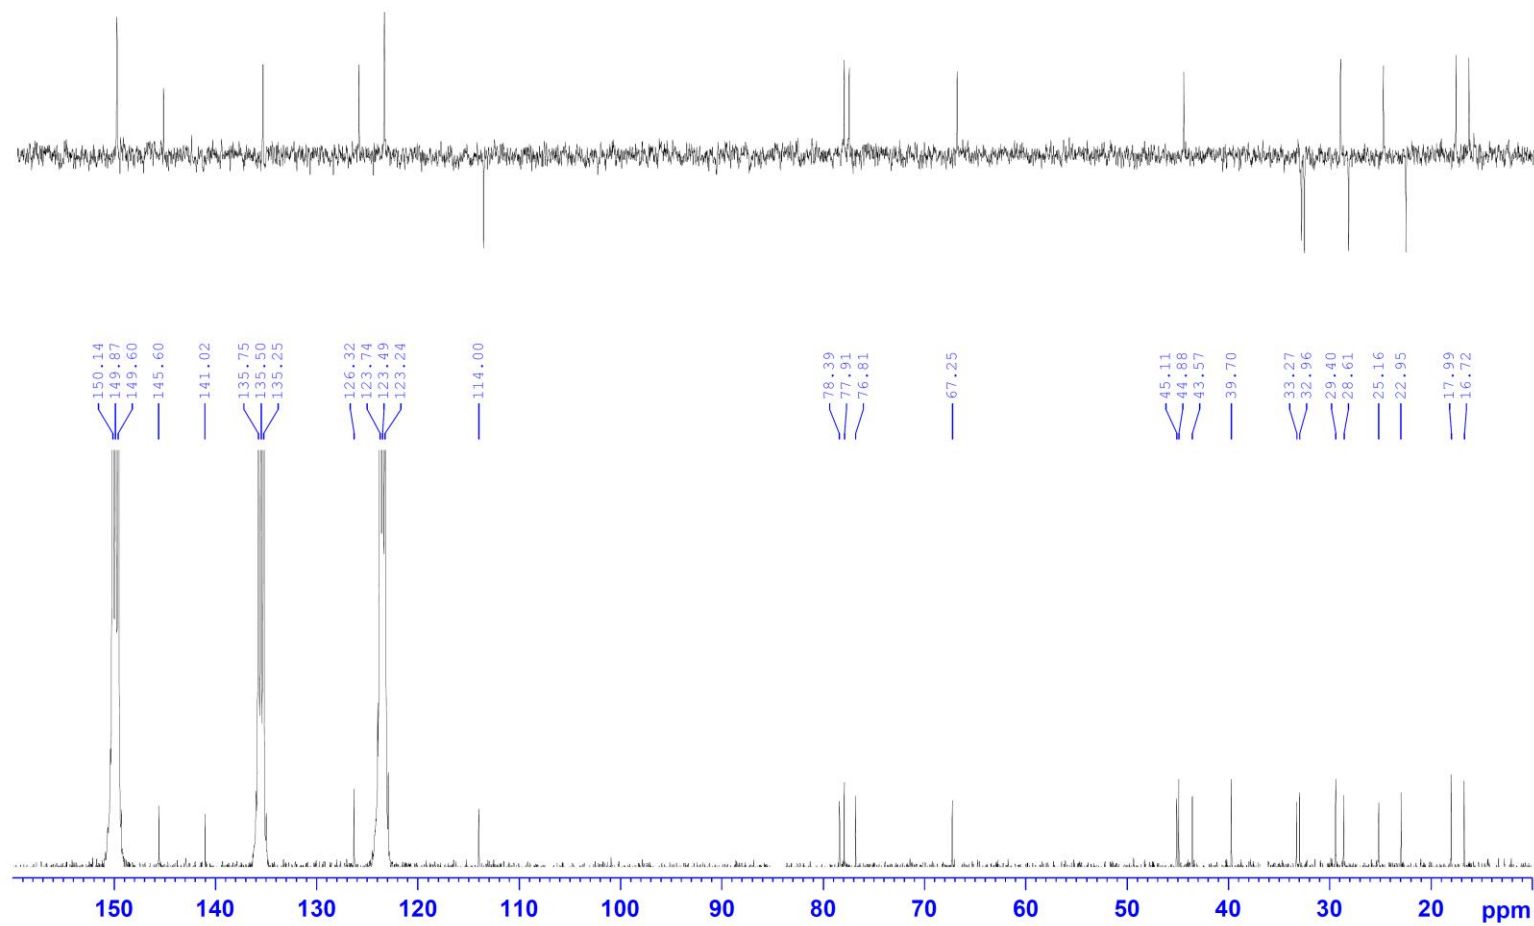

Figure S27. DEPT spectrum of 4.

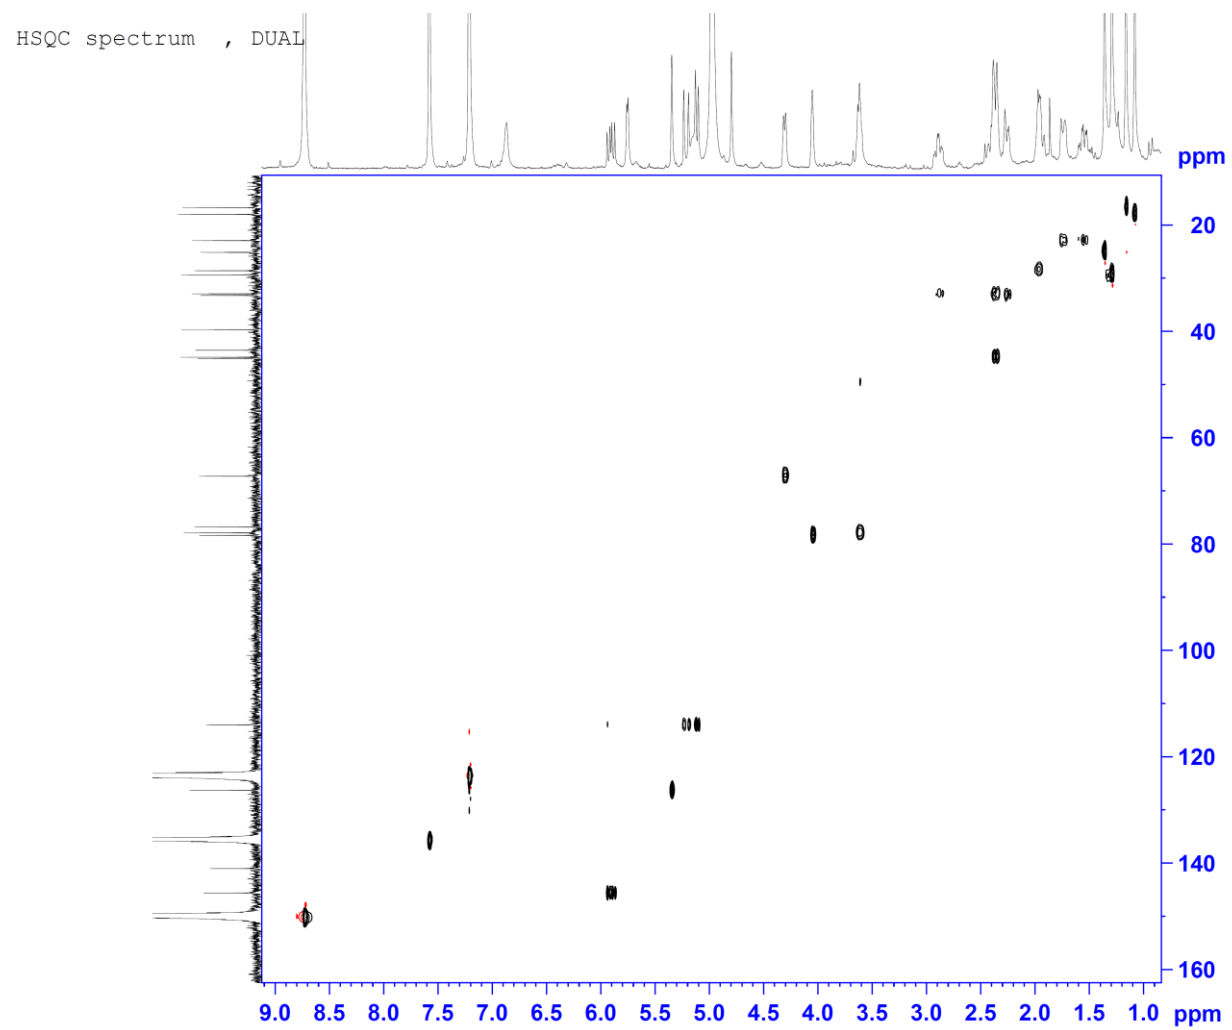

Figure S28. HSQC spectrum of 4.

HMBC spectrum of sample in solvent at Av400 DUAL, CMC

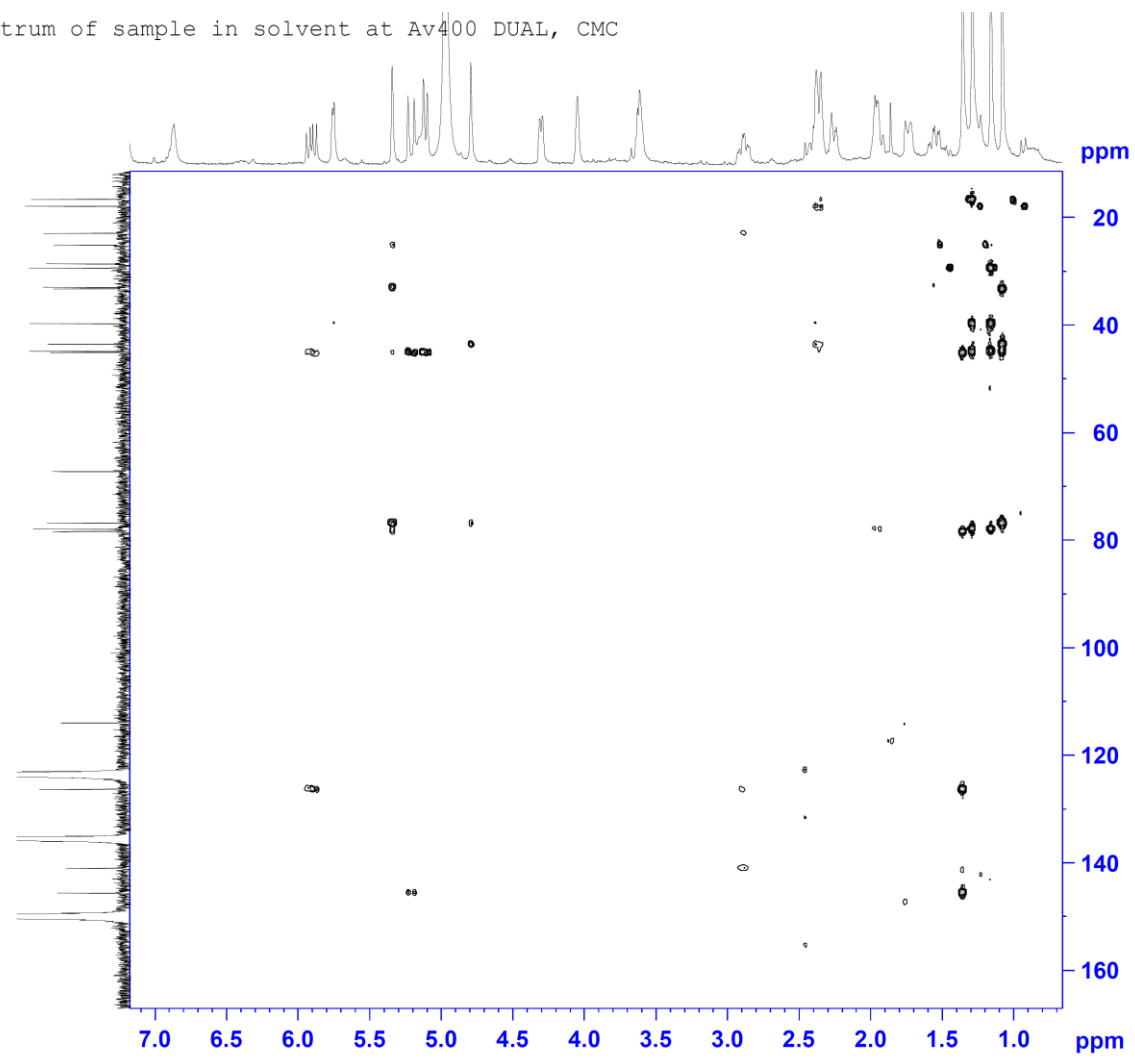

Figure S29. HMBC spectrum of 4.



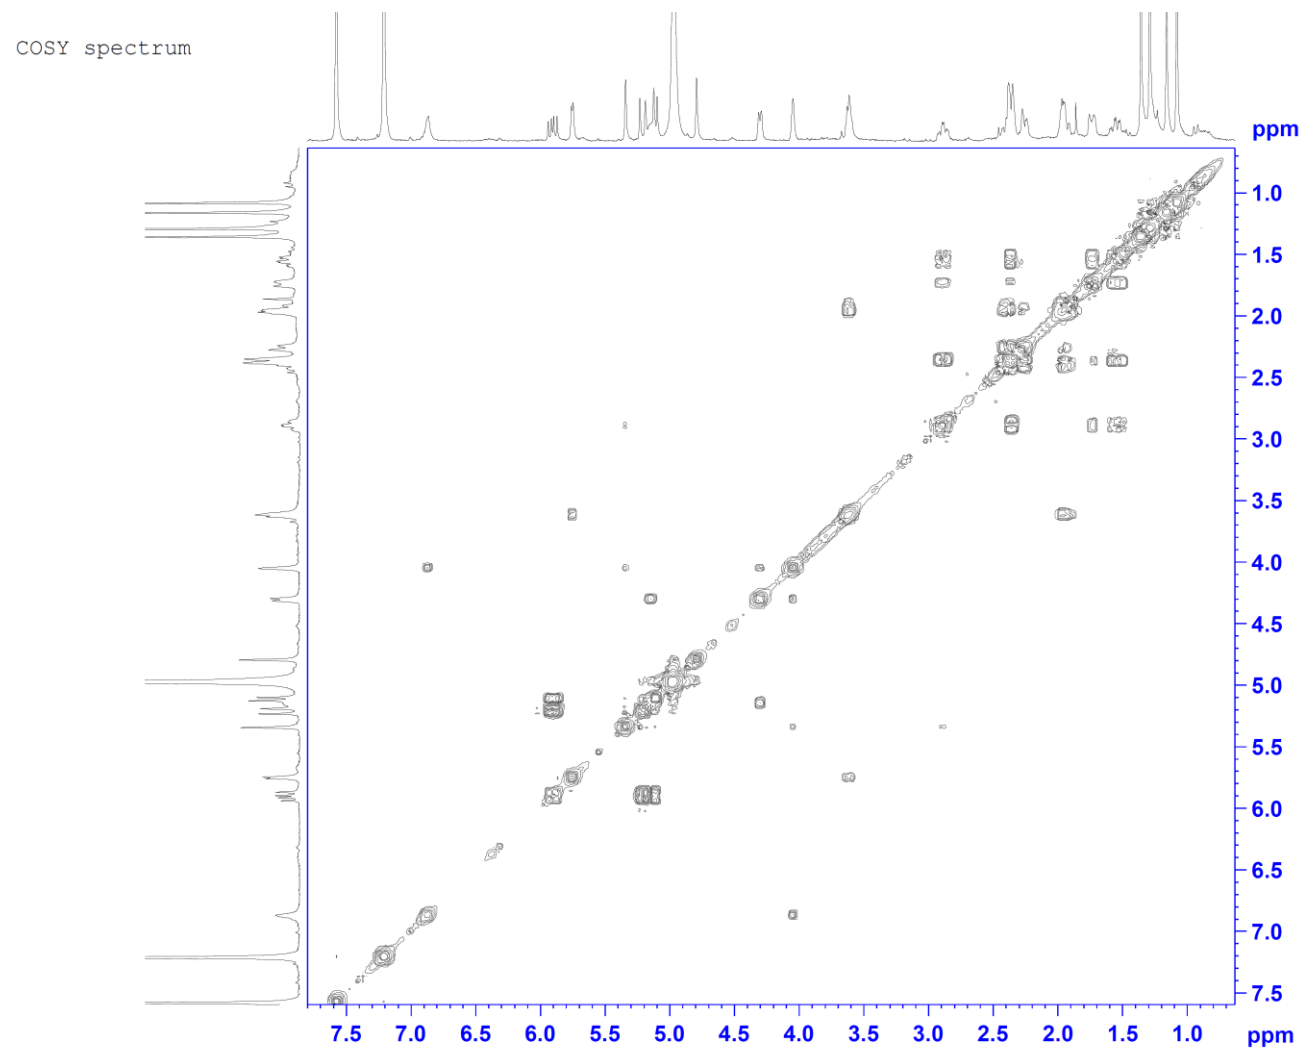

**Figure S30.** COSY spectrum of **4**.

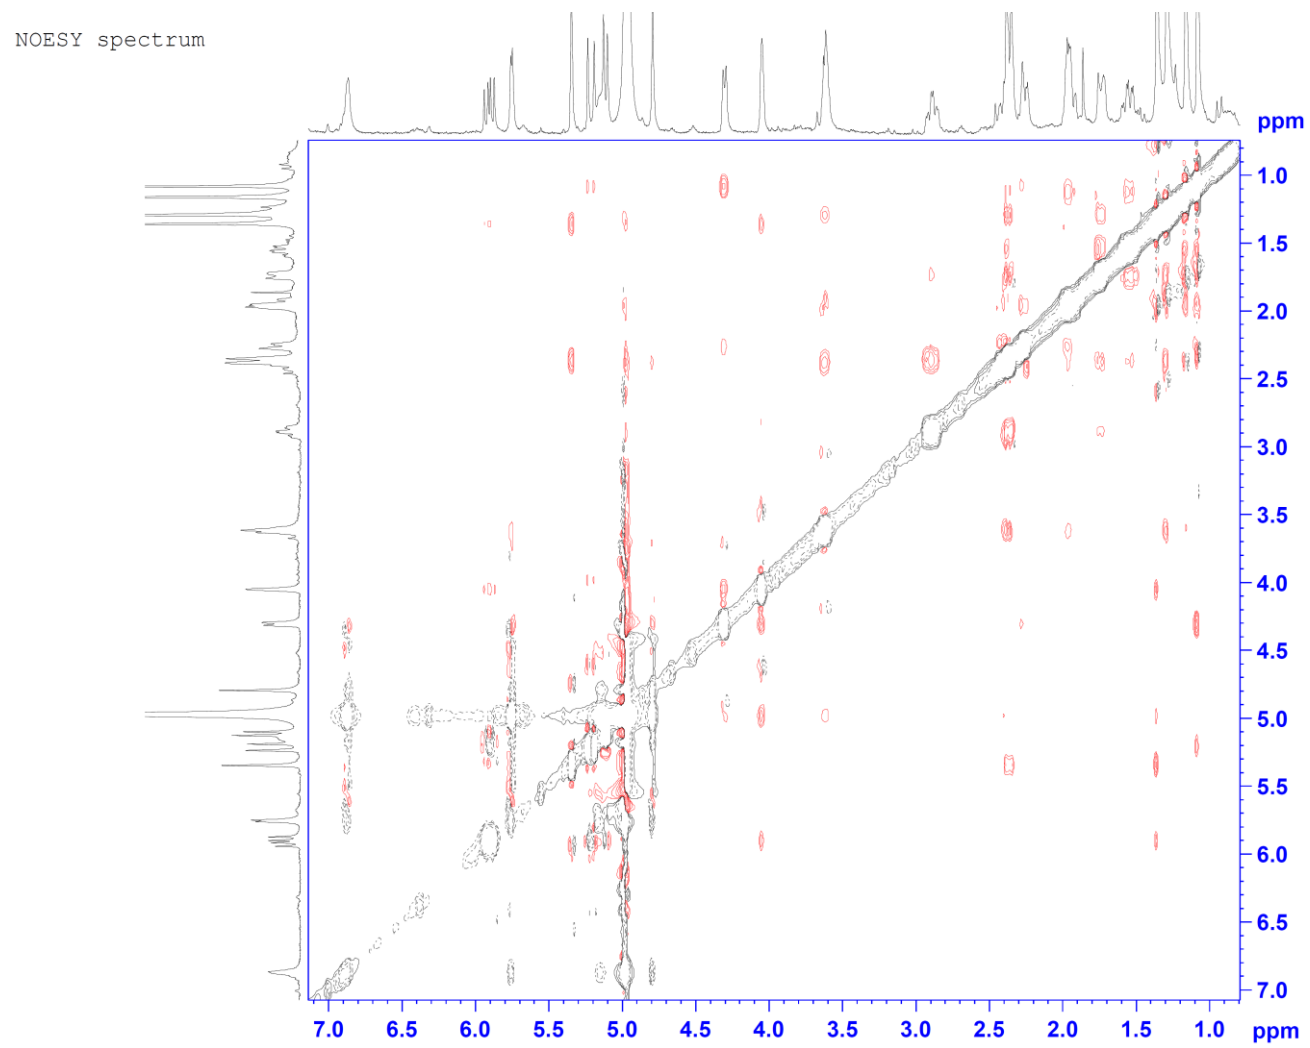

**Figure S31.** NOESY spectrum of **4**.

F:\Exp\_data\...\30-FV-CI-17J3C-APCI-H

2017/9/12 上午 11:28:26

30-FV-CI-17J3C-APCI-H#1-20 RT: 0.00-0.52 AV: 20

T: FTMS - p APCI corona Full ms [300.00-340.00]

m/z= 317.1727-317.1781

Isotope Min Max

O-16 0 4

C-12 0 19

H-1 0 27

Charge 1

Mass tolerance 1000.00 ppm

Nitrogen rule not used

RDB equiv -1.00-100.00

max results 1

| m/z      | Intensity | Relative | Theo.<br>Mass | Delta<br>(ppm) | Composition                                    |
|----------|-----------|----------|---------------|----------------|------------------------------------------------|
| 317.1752 | 329827.7  | 100.00   | 317.1747      | 1.46           | C <sub>19</sub> H <sub>25</sub> O <sub>4</sub> |

**Figure S32.** (-)-HR-APCIMS spectrum of **5**.

FV-C1-17J3C in CDCl<sub>3</sub> 500 MHz NMR

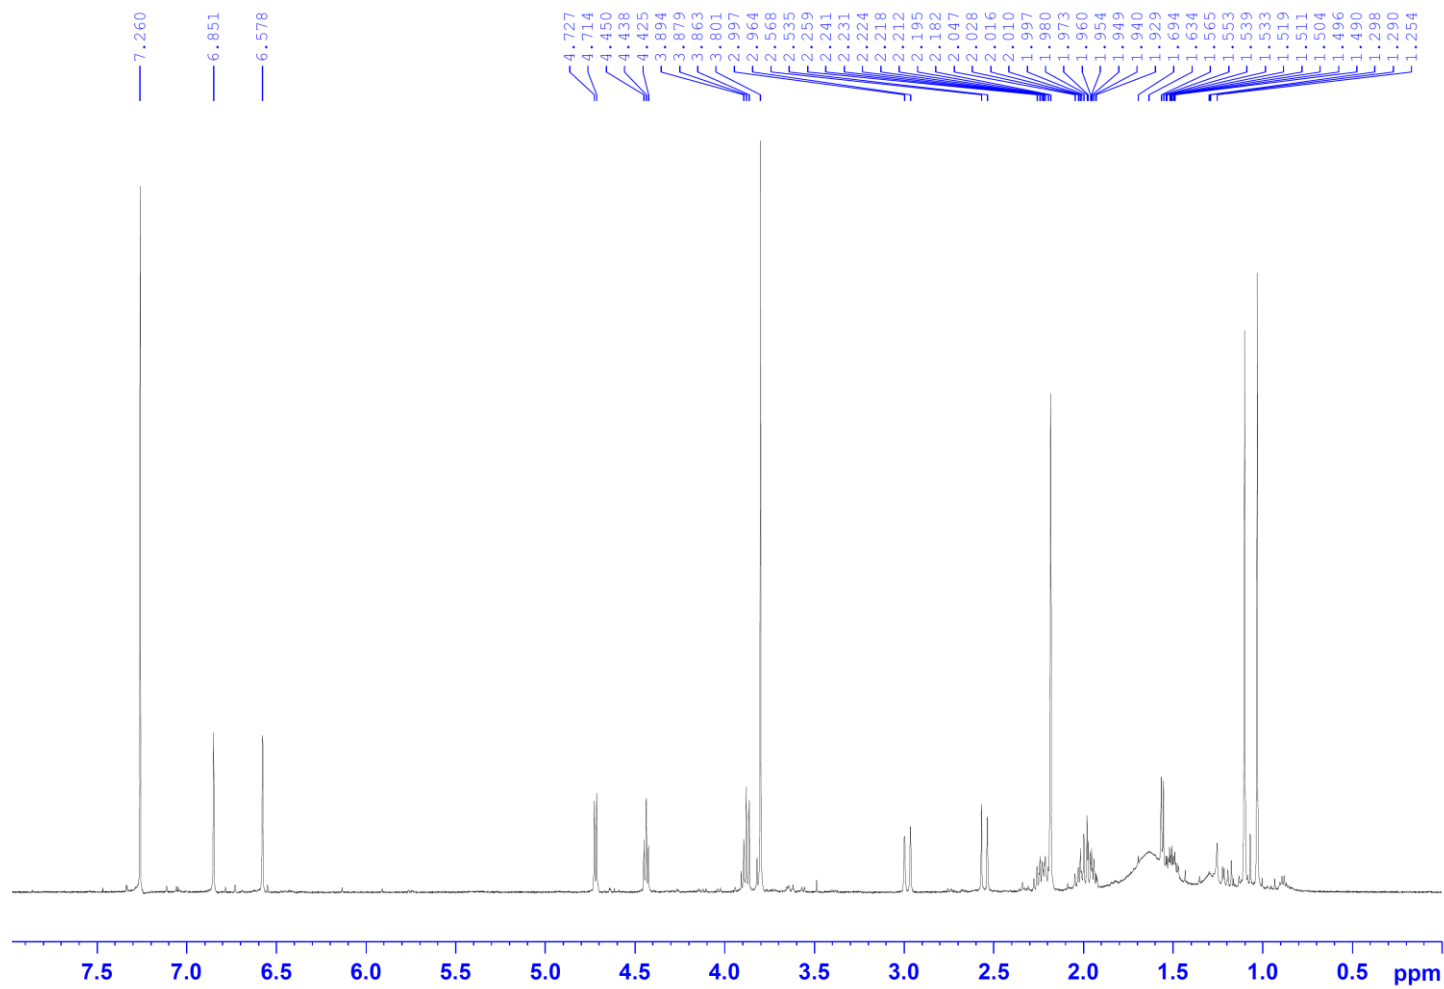

Figure S33. <sup>1</sup>H NMR spectrum of **5**.

$^{13}\text{C}$

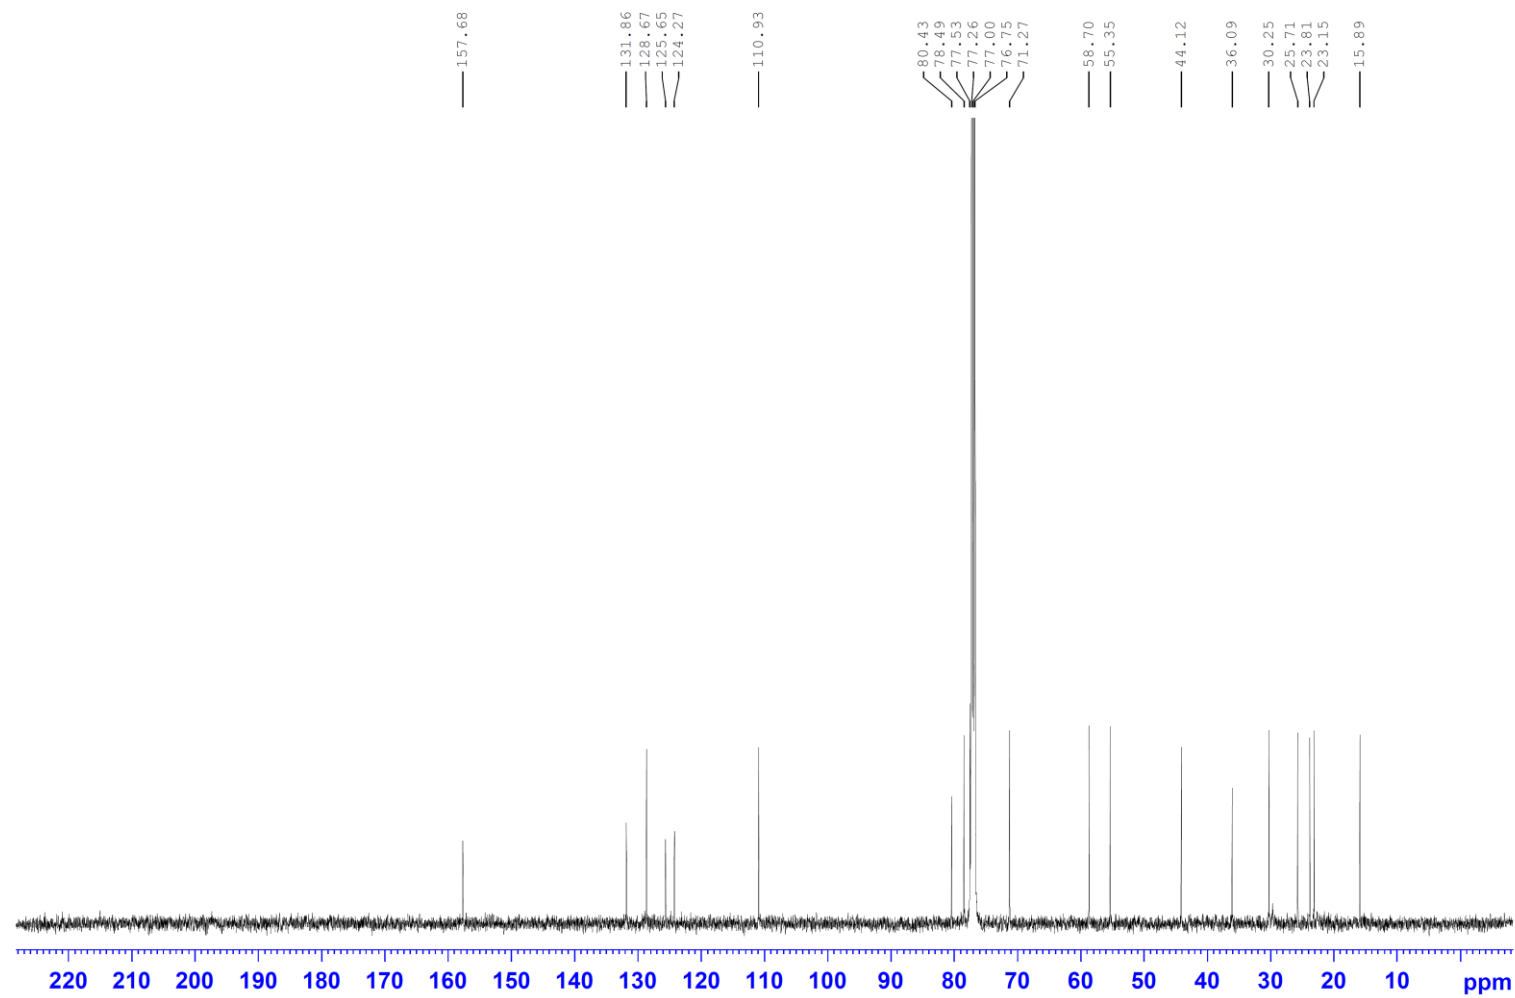

Figure S34.  $^{13}\text{C}$  NMR spectrum of 5.

Dept

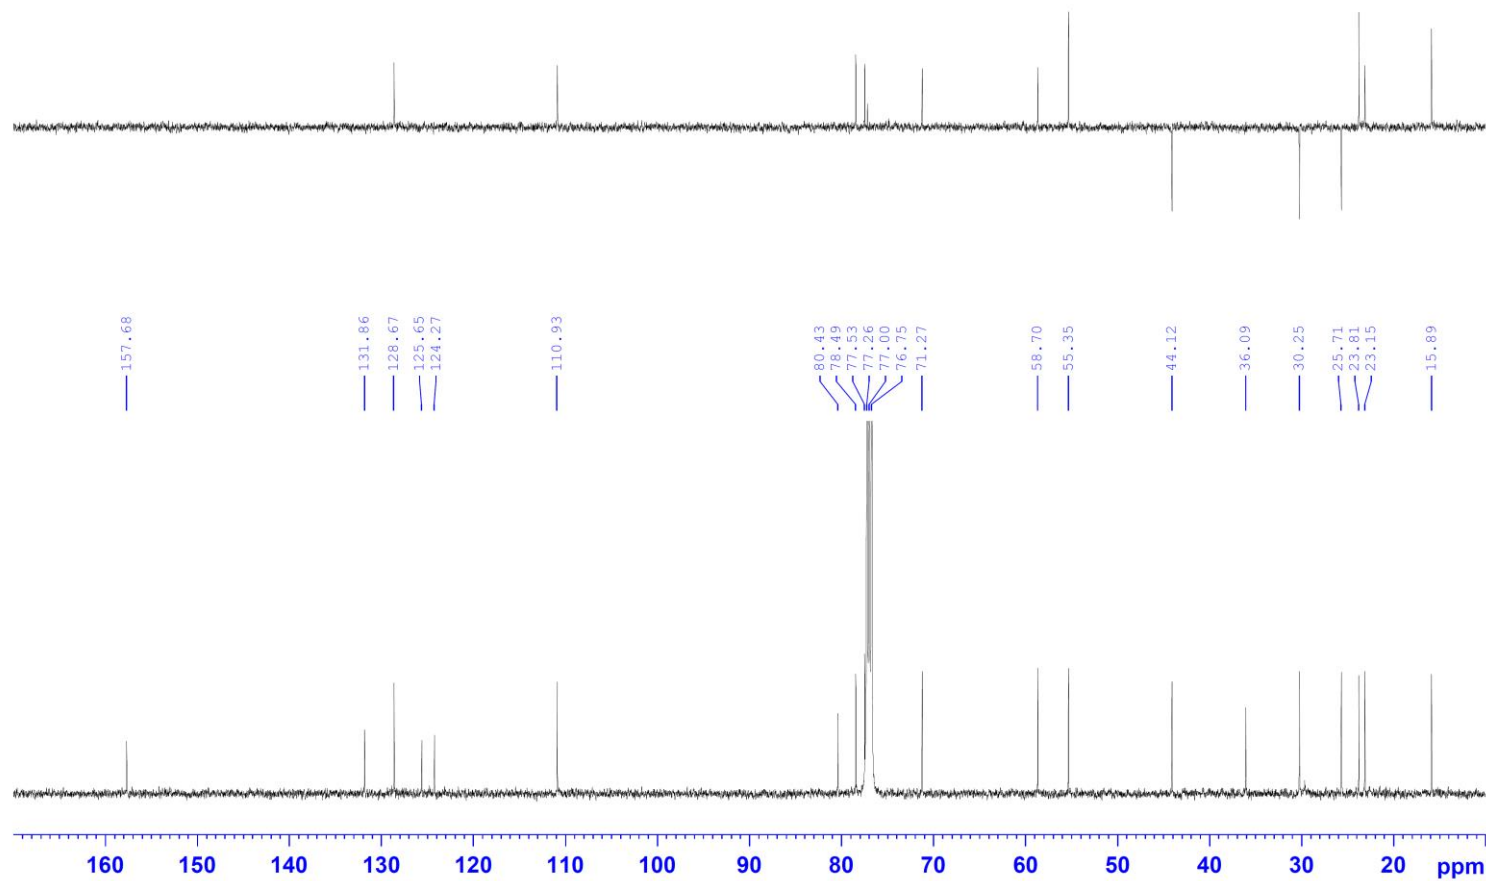

Figure S35. DEPT spectrum of 5.

HSQC

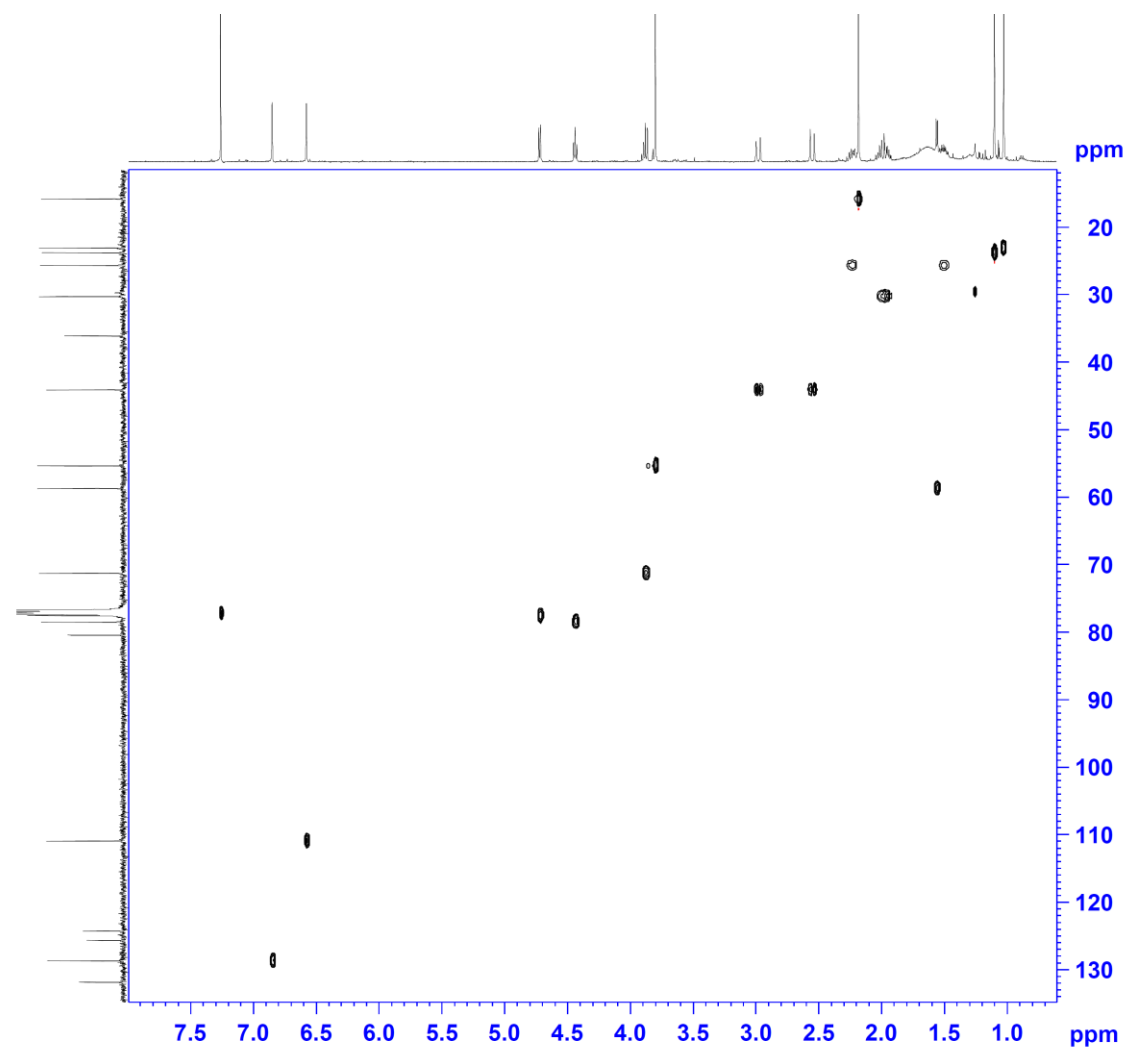

Figure S36. HSQC spectrum of **5**.

HMBC

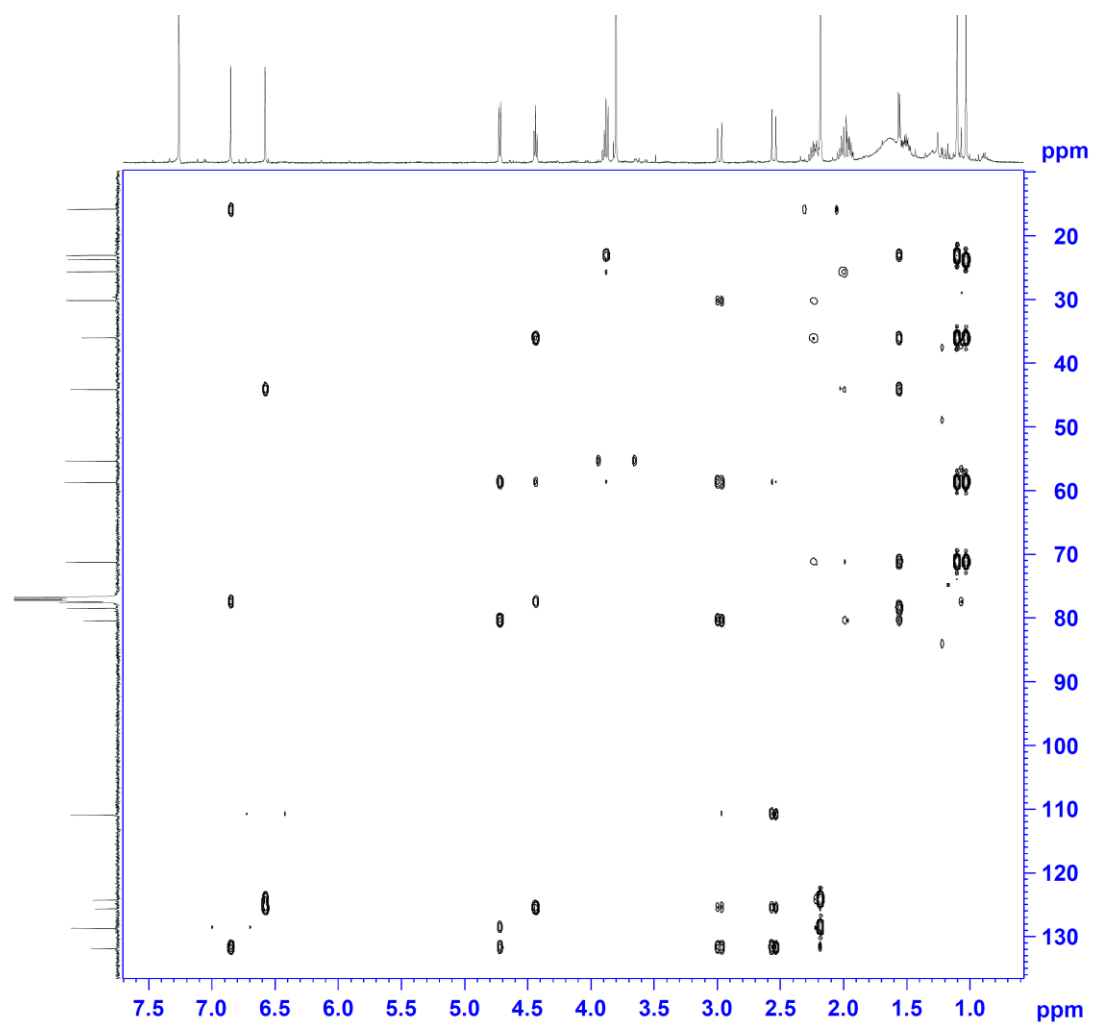

Figure S37. HMBC spectrum of **5**.



COSY

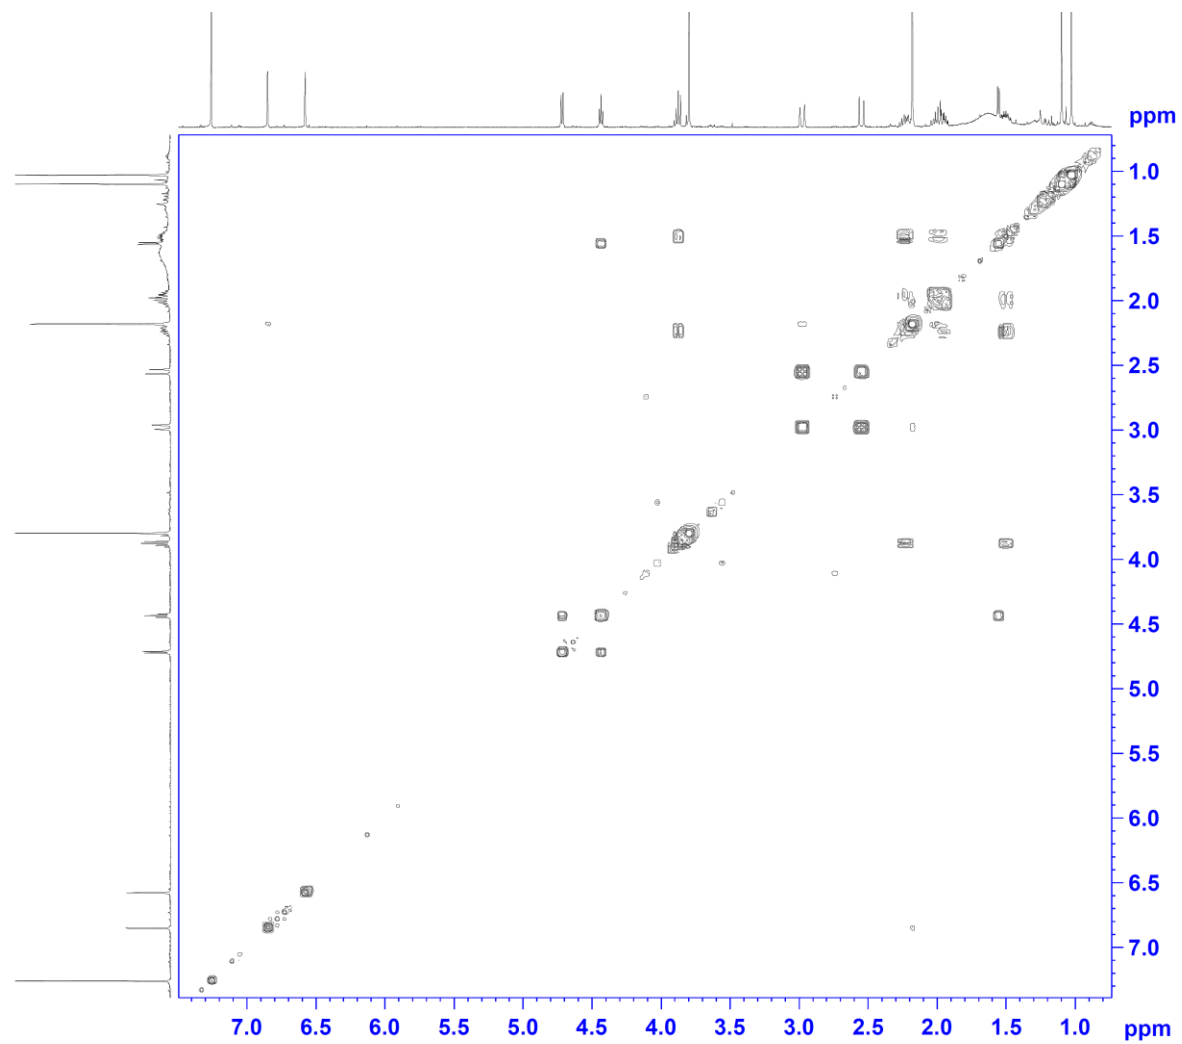

**Figure S38.** COSY spectrum of **5**.

NOESY

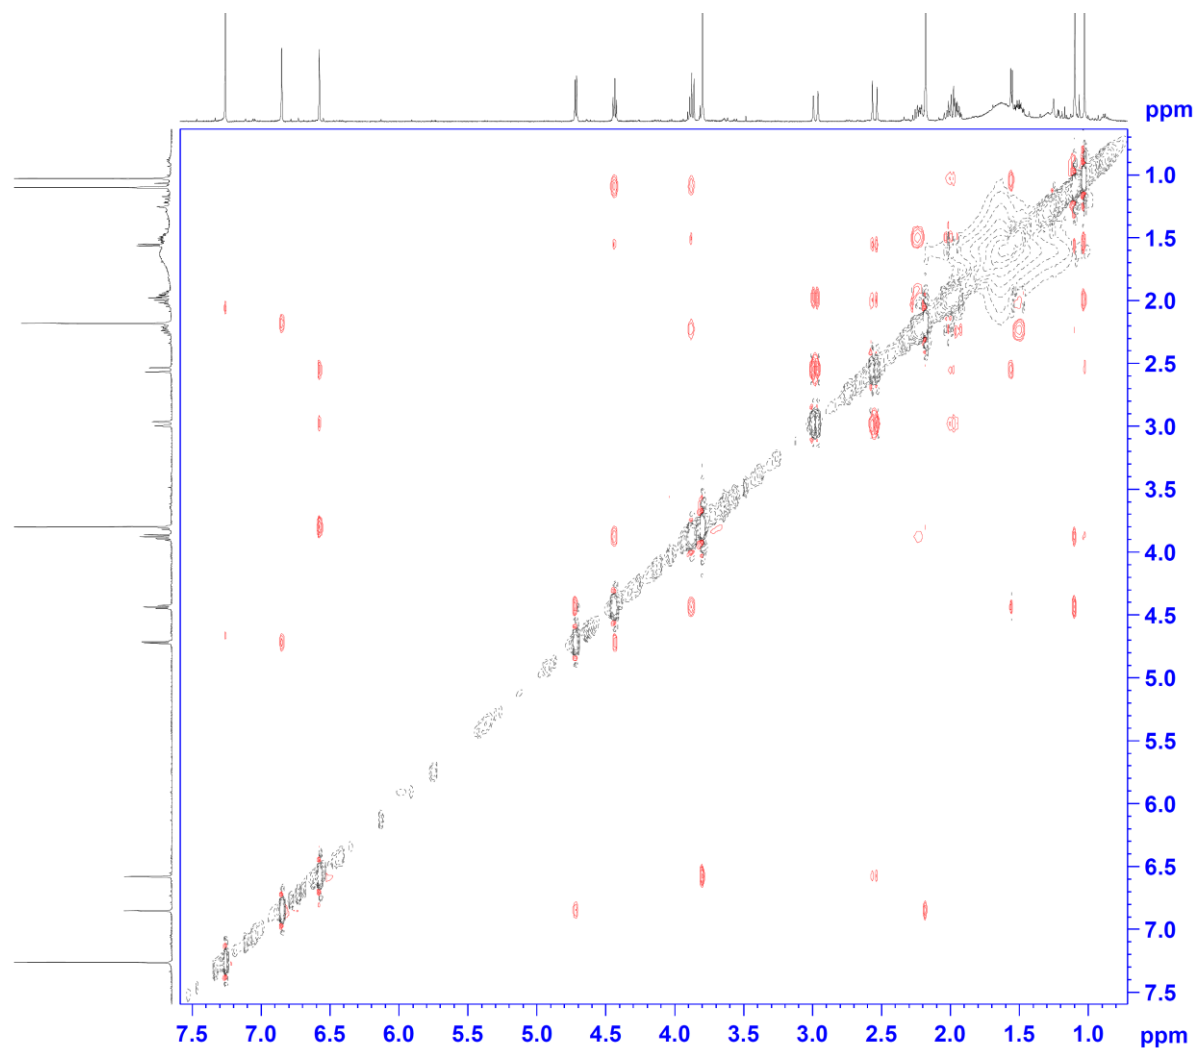

**Figure S39.** NOESY spectrum of **5**.

F:\Exp\_data\...\07-FV-Cl-17J6C-H

2017/9/14 下午 02:11:36

07-FV-Cl-17J6C-H#1-20 RT: 0.01-0.28 AV: 20

T: FTMS + p ESI Full ms [150.00-500.00]

m/z= 341.1300-341.1982

Isotope Min Max

O-16 0 4

C-12 0 19

H-1 0 27

Na-23 0 1

Charge 1

Mass tolerance 1000.00 ppm

Nitrogen rule not used

RDB equiv -1.00-100.00

max results 1

| m/z      | Intensity | Relative | Theo.<br>Mass | Delta<br>(ppm) | Composition                                       |
|----------|-----------|----------|---------------|----------------|---------------------------------------------------|
| 341.1720 | 2807975.5 | 100.00   | 341.1723      | -0.83          | C <sub>19</sub> H <sub>26</sub> O <sub>4</sub> Na |

**Figure S40.** (+)-HR-ESIMS spectra of **6**.

<sup>1</sup>H NMR spectrum (CDCl<sub>3</sub>) of compound 10a. The x-axis represents the chemical shift in ppm, ranging from 0.5 to 7.5. The spectrum shows several peaks corresponding to the structure of 10a. The integration values are provided above the peaks.

| Chemical Shift (ppm) | Integration |
|----------------------|-------------|
| 7.260                | 7.260       |
| 6.960                | 6.960       |
| 6.630                | 6.630       |
| 6.624                | 6.624       |
| 6.600                | 6.600       |
| 6.594                | 6.594       |
| 6.579                | 6.579       |
| 5.873                | 5.873       |
| 5.863                | 5.863       |
| 5.843                | 5.843       |
| 5.831                | 5.831       |
| 3.999                | 3.999       |
| 3.991                | 3.991       |
| 3.837                | 3.837       |
| 3.636                | 3.636       |
| 3.629                | 3.629       |
| 2.963                | 2.963       |
| 2.928                | 2.928       |
| 2.699                | 2.699       |
| 2.664                | 2.664       |
| 2.396                | 2.396       |
| 2.390                | 2.390       |
| 2.386                | 2.386       |
| 2.380                | 2.380       |
| 2.272                | 2.272       |
| 2.263                | 2.263       |
| 2.236                | 2.236       |
| 2.227                | 2.227       |
| 2.178                | 2.178       |
| 1.968                | 1.968       |
| 1.932                | 1.932       |
| 1.246                | 1.246       |
| 1.030                | 1.030       |

**Figure S41.**  $^1\text{H}$  NMR spectrum of **6**.

FV-C1-17J6C in CDCl<sub>3</sub> 400 MHz NMR

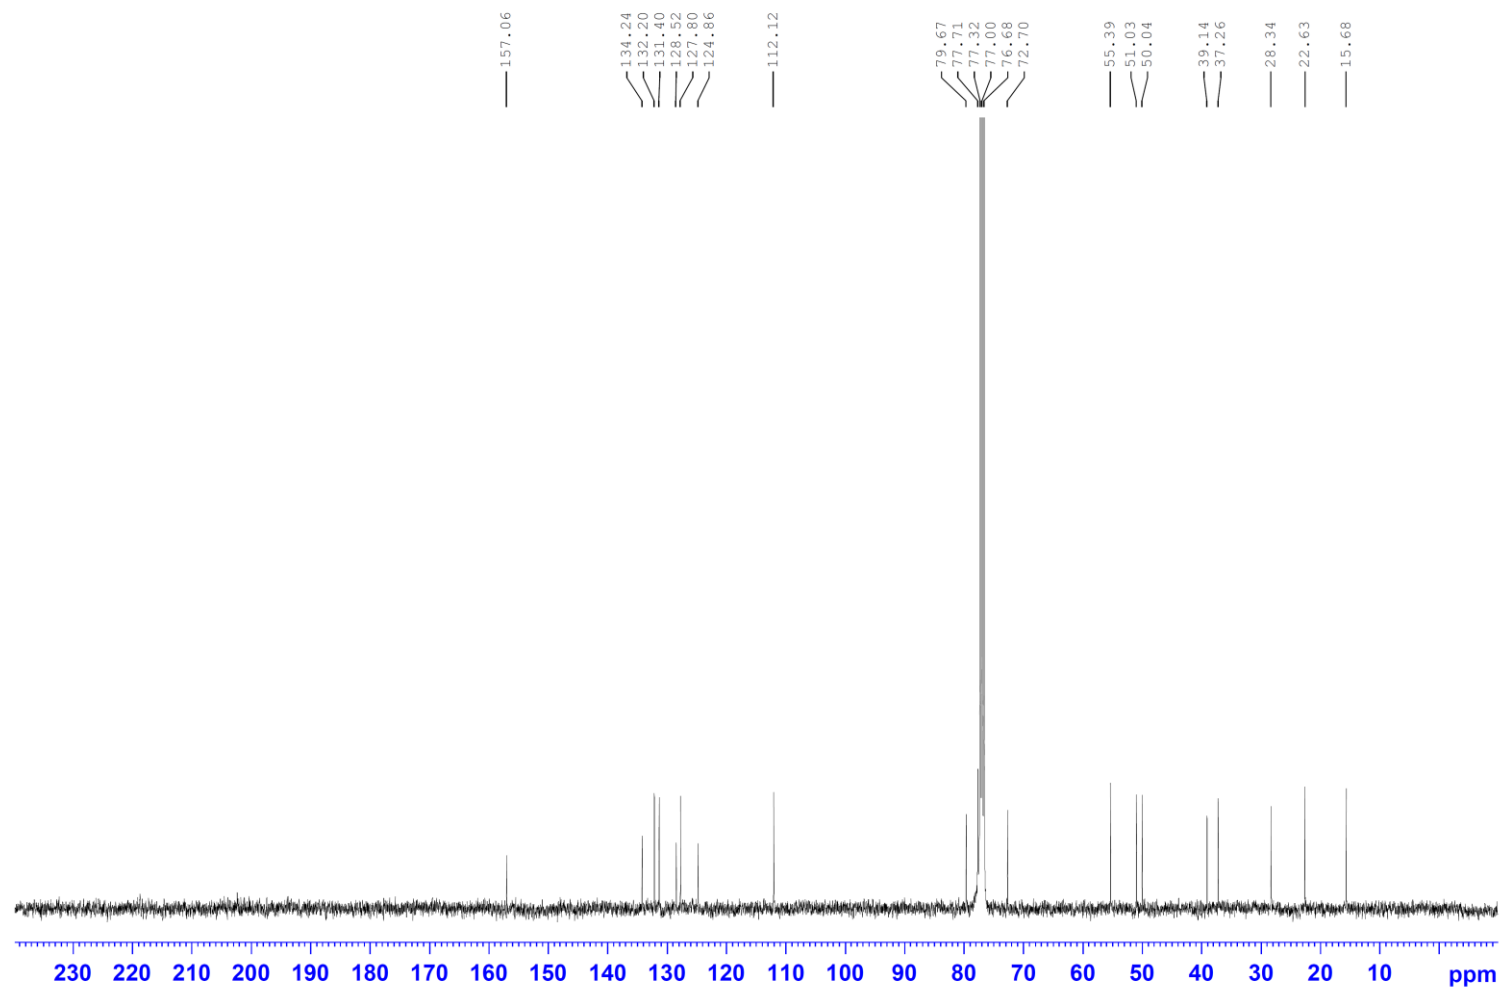

Figure S42. <sup>13</sup>C NMR spectrum of 6.

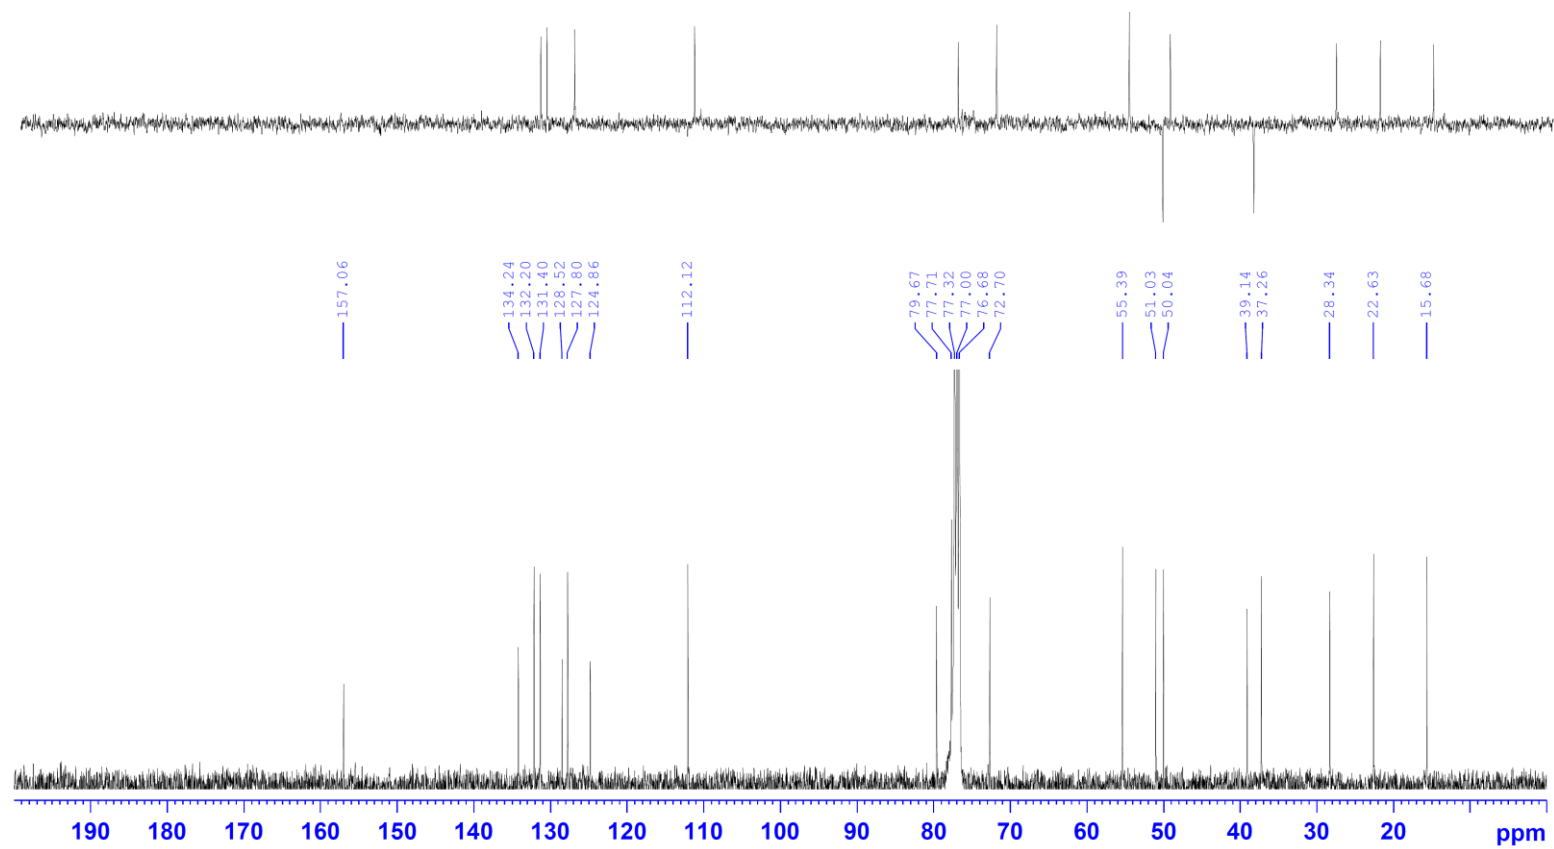

Figure S43. DEPT spectrum of 6.

HSQC

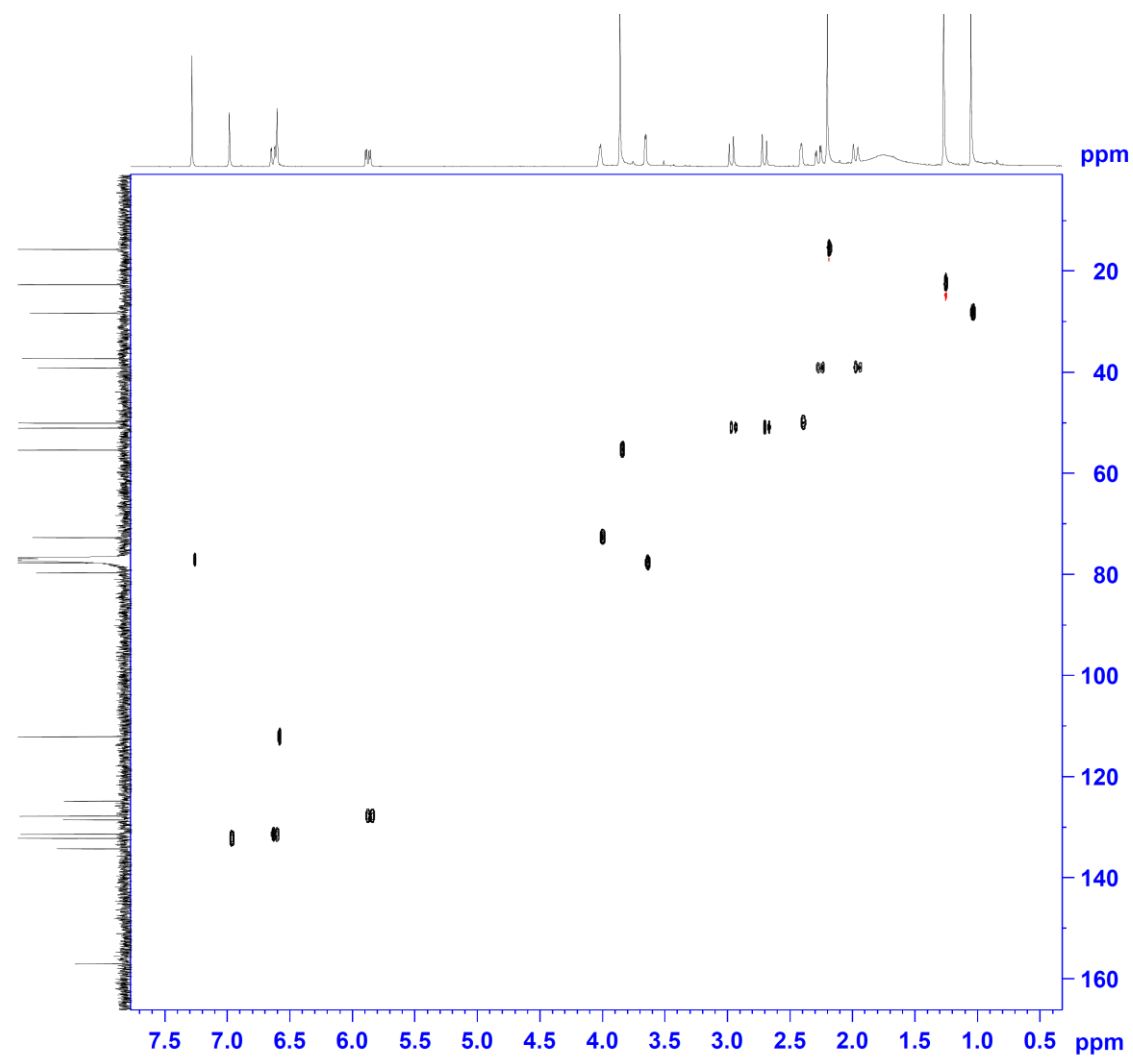

Figure S44. HSQC spectrum of 6.

HMBC

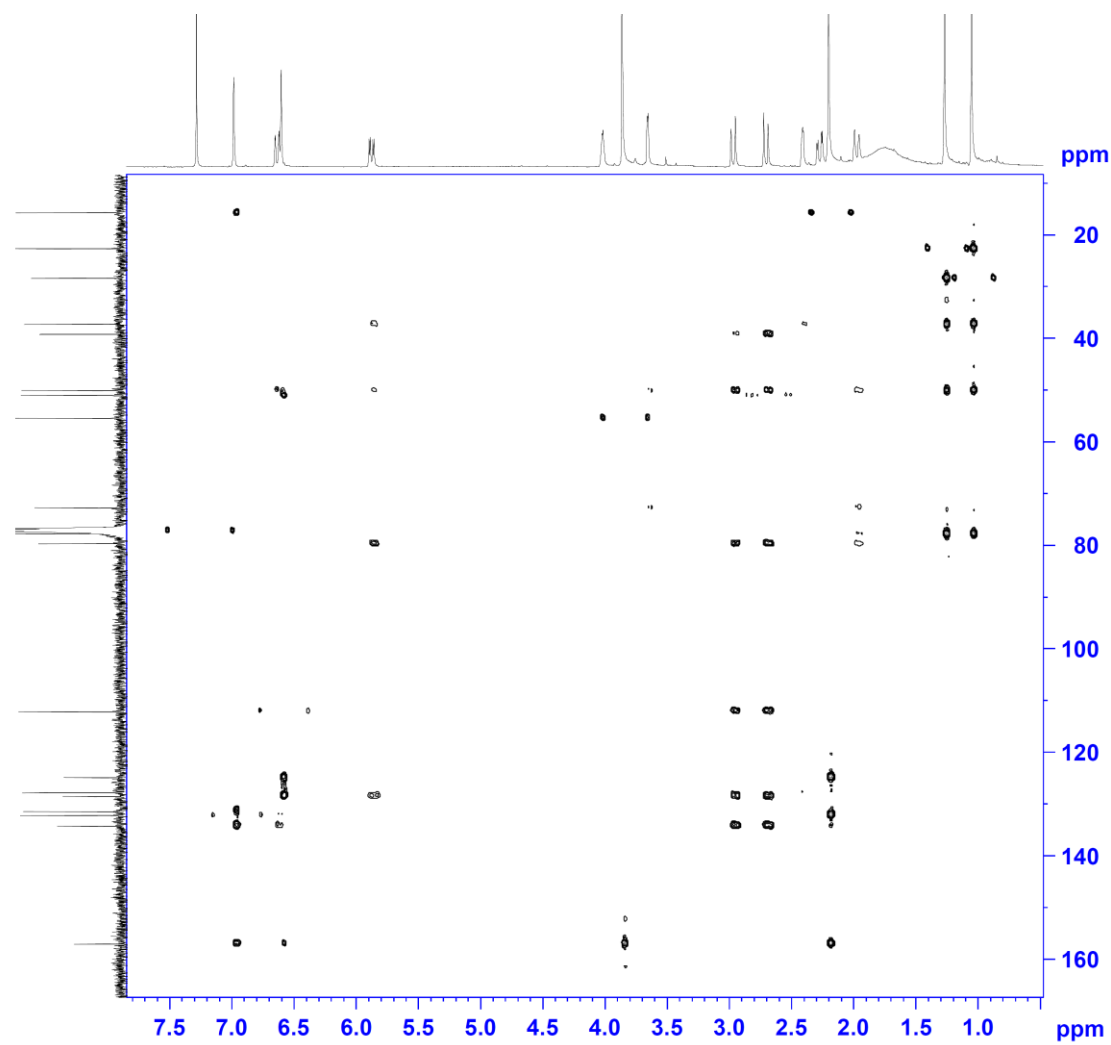

Figure S45. HMBC spectrum of **6**.



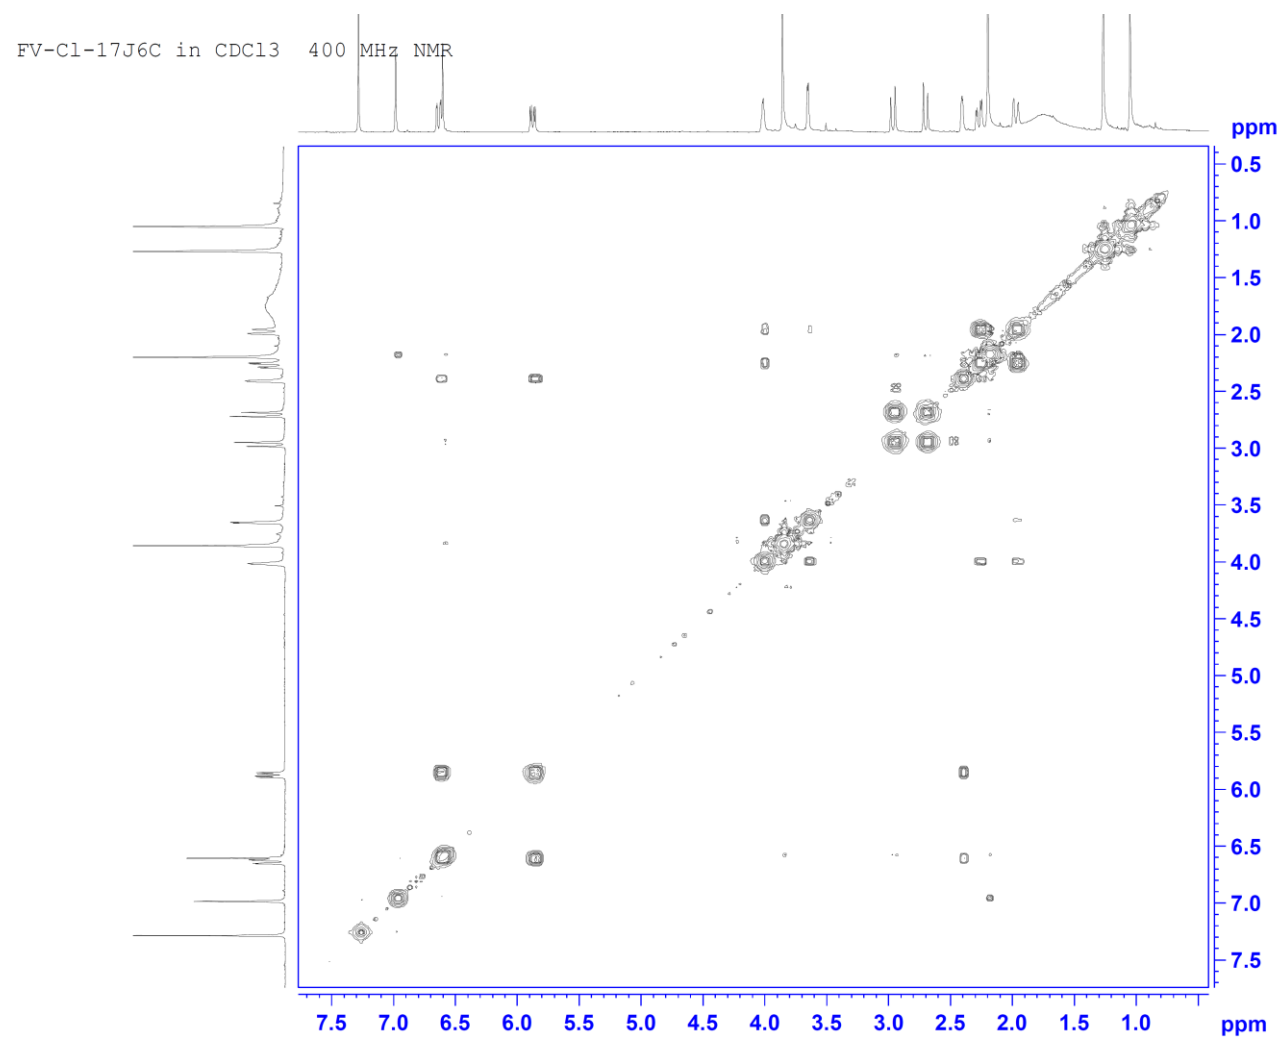

**Figure S46.** COSY spectrum of **6**.

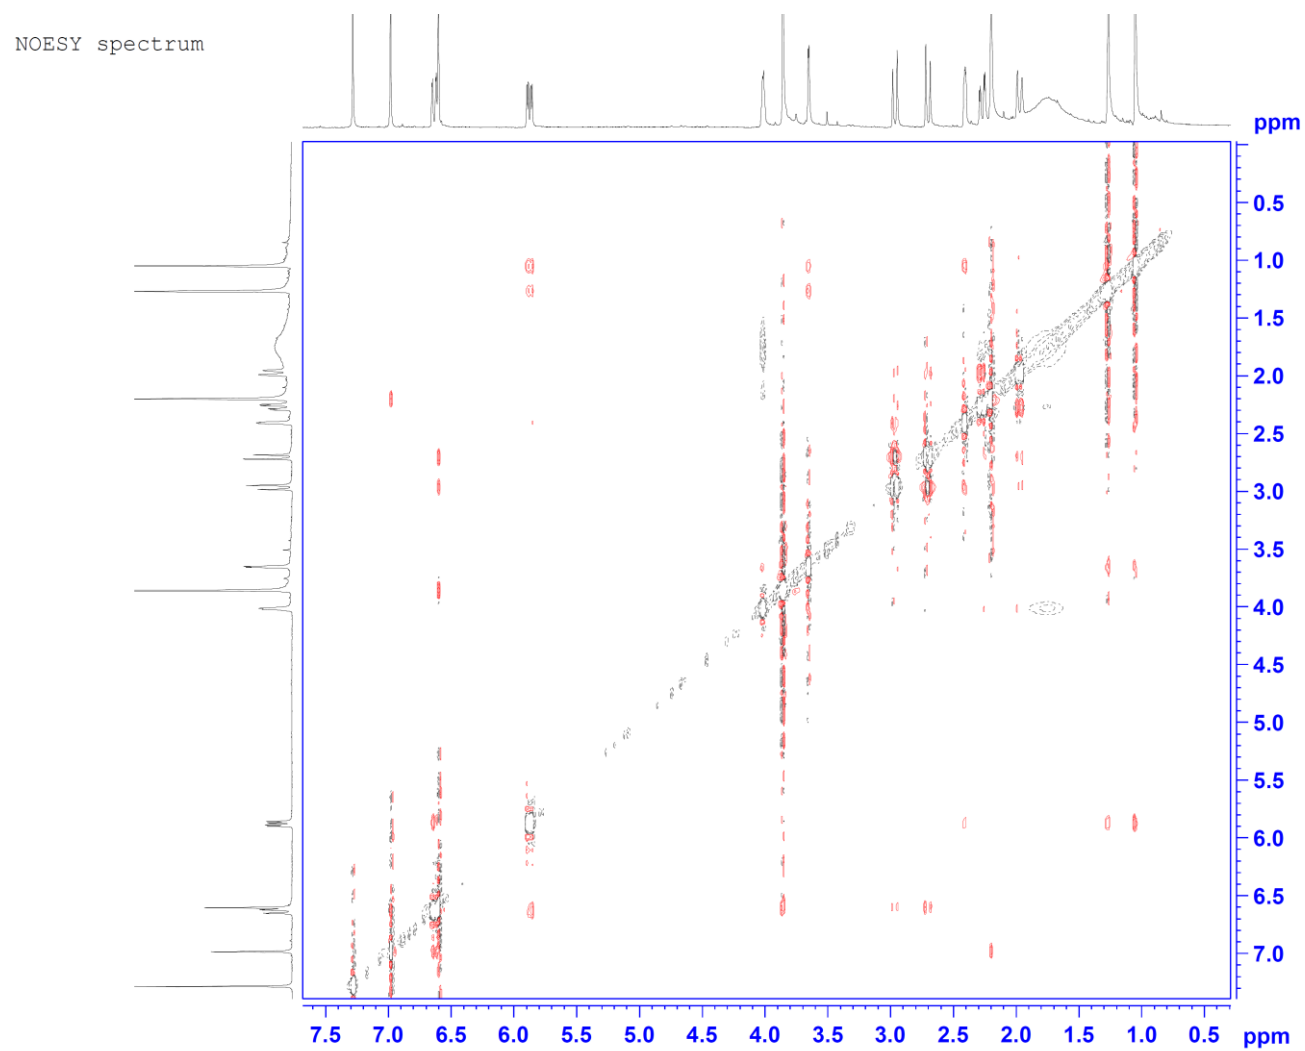

Figure S47. NOESY spectrum of **6**.

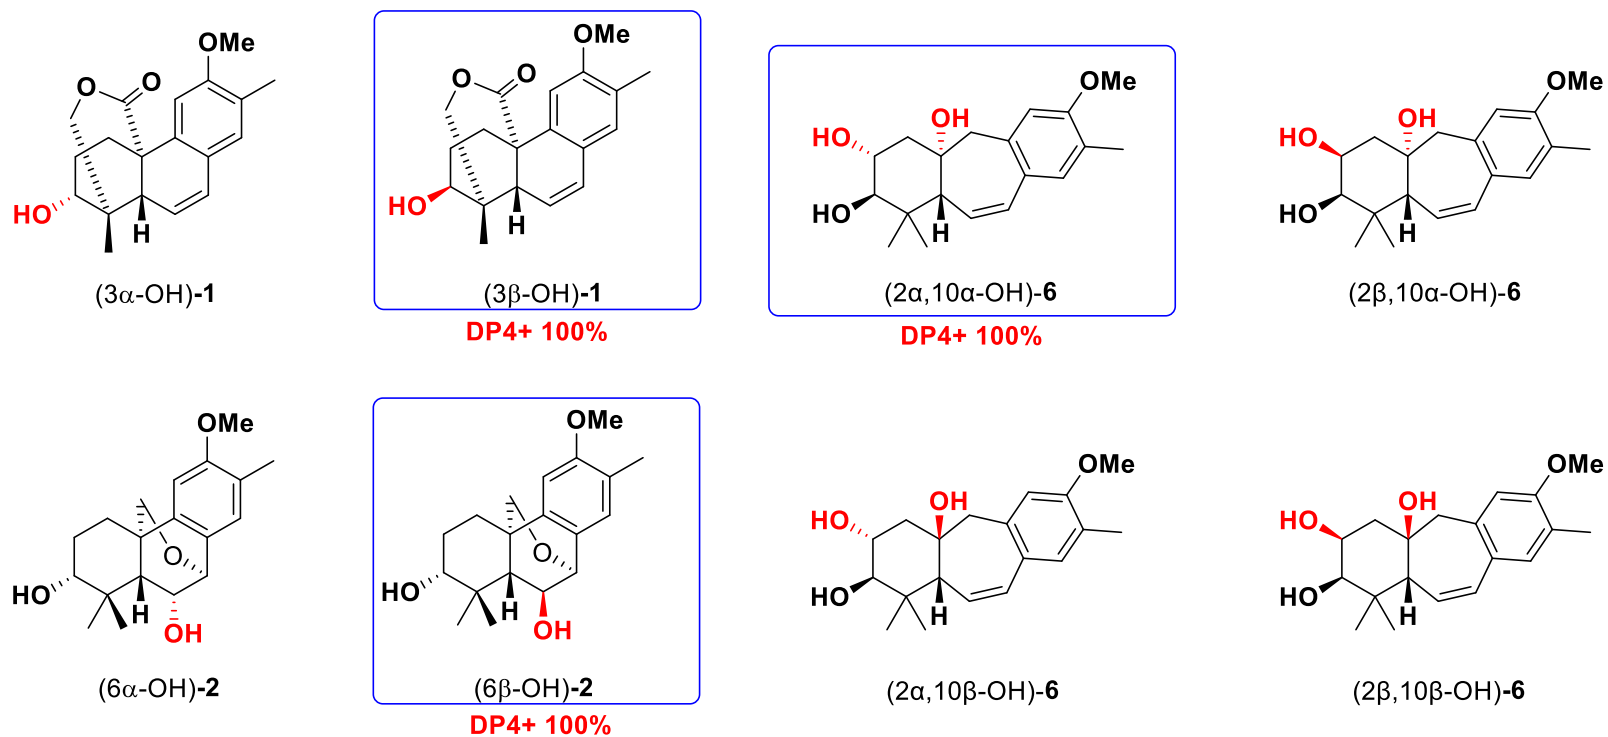

**Figure S48.** Possible candidates of compounds **1**, **2**, and **6** for DP4+ probability analysis.

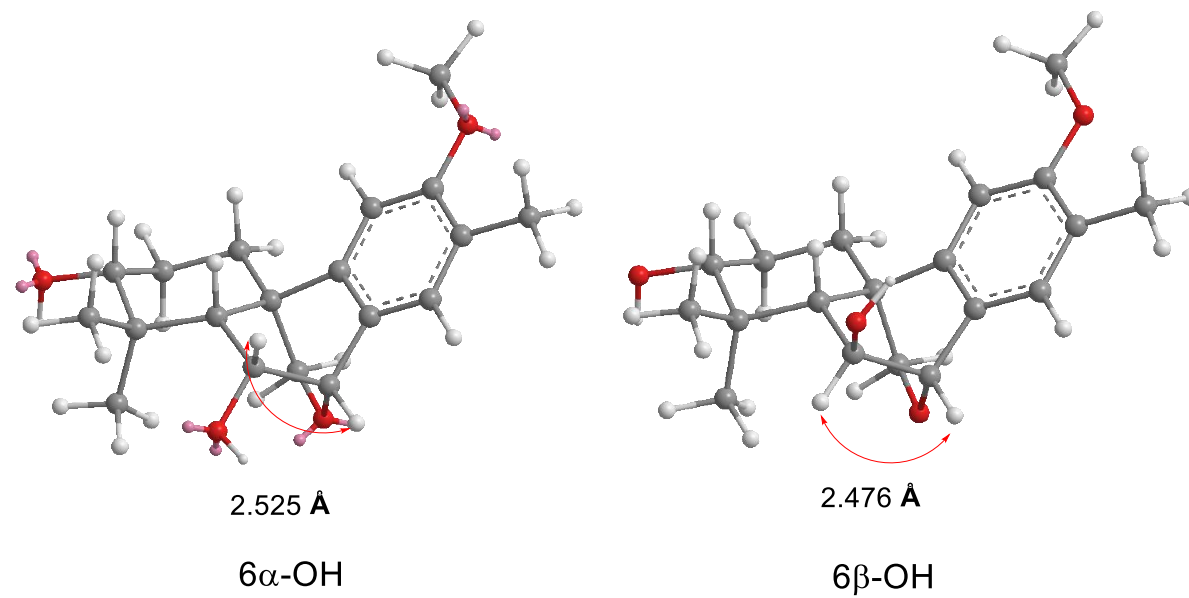

**Figure S49.** H-6/H-7 distance of 6 $\alpha$ -OH and 6 $\beta$ -OH possible candidates of compound **2**. Conformers were generated by MM2 energy minimizations.

**Table S1.** DP4+ analysis table for compound **1** (isomer **1**: 3 $\beta$ -OH; isomer **2**: 3 $\alpha$ -OH).

| Functional            |      | Solvent? |             | Basis Set   |   |
|-----------------------|------|----------|-------------|-------------|---|
| mPW1PW91              |      | PCM      |             | 6-31+G(d,p) |   |
|                       |      |          |             |             |   |
| Isomer N <sup>o</sup> |      |          | 1           | 2           | 3 |
| DP4+ (%)              |      | H data   | 100.00%     | 0.00%       | - |
|                       |      | C data   | 100.00%     | 0.00%       | - |
|                       |      | All data | 100.00%     | 0.00%       | - |
| Type                  | sp2? | Exp      | 1           | 2           | 3 |
| C                     | x    | 108.1    | 89.59574001 | 89.2967897  |   |
| C                     | x    | 134.8    | 61.9701478  | 62.489968   |   |
| C                     | x    | 125.2    | 72.23589959 | 72.5038408  |   |
| C                     | x    | 129      | 69.60684022 | 69.4925838  |   |
| C                     | x    | 125.9    | 71.8181605  | 71.6585755  |   |
| C                     | x    | 157.4    | 41.8256481  | 41.7256232  |   |
| C                     |      | 47.5     | 143.8645873 | 144.333204  |   |
| C                     |      | 39       | 153.4398502 | 147.823136  |   |
| C                     | x    | 122.8    | 73.78434471 | 74.8083597  |   |
| C                     | x    | 131.2    | 66.20999243 | 66.4814807  |   |
| C                     |      | 15.8     | 177.347593  | 177.423368  |   |
| C                     |      | 27.9     | 163.9664729 | 160.691371  |   |
| C                     |      | 28.9     | 164.7070977 | 163.300495  |   |
| C                     |      | 74.5     | 119.3974051 | 120.03775   |   |
| C                     |      | 36.6     | 155.7825877 | 155.226002  |   |
| C                     |      | 19.3     | 176.4108609 | 176.814747  |   |
| C                     | x    | 174.5    | 24.27630265 | 24.4480983  |   |
| C                     |      | 75.4     | 121.5269572 | 124.880552  |   |
| C                     |      | 55.4     | 142.015428  | 142.109266  |   |
|                       |      |          |             |             |   |
| H                     | x    | 6.93     | 24.51803458 | 24.5233053  |   |
| H                     | x    | 6.89     | 24.39986759 | 24.42251    |   |
| H                     |      | 2.94     | 28.42534812 | 29.0671563  |   |
| H                     | x    | 5.9      | 25.34491231 | 25.2815031  |   |
| H                     | x    | 6.6      | 24.54488507 | 24.6163656  |   |
| H                     |      | 2.18     | 29.33899984 | 29.3323841  |   |
| H                     |      | 2.42     | 29.32183365 | 29.0578319  |   |
| H                     |      | 2.28     | 29.33693171 | 29.660755   |   |
| H                     |      | 2.1      | 29.66138839 | 29.5900136  |   |
| H                     |      | 2.05     | 29.47941688 | 29.7443486  |   |
| H                     |      | 3.81     | 27.72538307 | 27.8833957  |   |
| H                     |      | 1.19     | 30.47799693 | 30.3829288  |   |
| H                     |      | 4.04     | 27.52986444 | 26.8409481  |   |
| H                     |      | 4.37     | 27.11379826 | 27.3127916  |   |
| H                     |      | 3.88     | 27.62024425 | 27.6388816  |   |

**Table S2.** Conformers and Boltzmann populations of 3 $\alpha$ -OH isomer of **1**.

| <b>3<math>\alpha</math>1 (69.69%)</b> | <b>3<math>\alpha</math>2 (30.31%)</b> |
|---------------------------------------|---------------------------------------|
| C 1. 99573 -0. 7934 -0. 17558         | C 1. 996059 -0. 78716 -0. 18317       |
| C 0. 972396 0. 154266 -0. 09847       | C 0. 972865 0. 160853 -0. 10569       |
| C 1. 314187 1. 519463 -0. 05034       | C 1. 315497 1. 525083 -0. 04084       |
| C 2. 667677 1. 889923 -0. 08531       | C 2. 669846 1. 894231 -0. 0618        |
| C 3. 697269 0. 960313 -0. 17587       | C 3. 69915 0. 964633 -0. 15348        |
| C 3. 337629 -0. 40112 -0. 21977       | C 3. 338642 -0. 39609 -0. 21317       |
| C -0. 50657 -0. 23837 0. 025388       | C -0. 50676 -0. 23444 0. 003024       |
| C -1. 42088 0. 831768 -0. 63714       | C -1. 42406 0. 848296 -0. 63578       |
| C -1. 0211 2. 229962 -0. 21788        | C -1. 01765 2. 243124 -0. 21326       |
| C 0. 261177 2. 527135 0. 035394       | C 0. 264722 2. 535009 0. 045192       |
| C 5. 147789 1. 366235 -0. 21767       | C 5. 150315 1. 369428 -0. 18045       |
| C -0. 81086 -1. 61655 -0. 62888       | C -0. 81206 -1. 59208 -0. 69457       |
| C -2. 28814 -2. 0092 -0. 50429        | C -2. 28579 -1. 99869 -0. 57227       |
| C -3. 2263 -0. 89451 -0. 97142        | C -3. 24888 -0. 87673 -0. 96675       |
| C -2. 90694 0. 491353 -0. 35109       | C -2. 90762 0. 509558 -0. 33479       |
| O -4. 58612 -1. 20387 -0. 66161       | O -4. 60244 -1. 26046 -0. 7234        |
| C -3. 87369 1. 515003 -0. 9813        | C -3. 88071 1. 539038 -0. 94214       |
| C -0. 83933 -0. 41502 1. 529567       | C -0. 83989 -0. 46484 1. 500359       |
| O -0. 04477 -0. 86407 2. 320824       | O -0. 05291 -0. 95579 2. 272872       |
| O -2. 11163 -0. 19585 1. 943429       | O -2. 1139 -0. 25306 1. 926113        |
| C -3. 10804 0. 507705 1. 16877        | C -3. 07906 0. 522849 1. 185637       |
| O 4. 38523 -1. 27694 -0. 30092        | O 4. 385806 -1. 27191 -0. 29407       |
| C 4. 11272 -2. 66862 -0. 28801        | C 4. 112096 -2. 66366 -0. 30147       |
| H 1. 753506 -1. 8468 -0. 18163        | H 1. 752946 -1. 84018 -0. 19978       |
| H 2. 920438 2. 947843 -0. 04472       | H 2. 923283 2. 951438 -0. 00925       |
| H -1. 26557 0. 755542 -1. 72889       | H -1. 28388 0. 779997 -1. 73017       |
| H -1. 77464 3. 010331 -0. 19007       | H -1. 76876 3. 026315 -0. 18988       |
| H 0. 554095 3. 546309 0. 280149       | H 0. 560452 3. 552757 0. 292573       |
| H 5. 249113 2. 454567 -0. 16581       | H 5. 252283 2. 457208 -0. 1193        |
| H 5. 708023 0. 927018 0. 616215       | H 5. 703421 0. 923052 0. 654381       |
| H 5. 634288 1. 017913 -1. 13669       | H 5. 643603 1. 027651 -1. 09826       |
| H -0. 19982 -2. 3958 -0. 16531        | H -0. 19372 -2. 38481 -0. 26511       |
| H -0. 51791 -1. 55806 -1. 68543       | H -0. 52986 -1. 49527 -1. 75092       |
| H -2. 47525 -2. 91475 -1. 09911       | H -2. 48791 -2. 87497 -1. 19907       |
| H -2. 53162 -2. 25966 0. 534101       | H -2. 4958 -2. 30144 0. 463059        |
| H -3. 1148 -0. 77738 -2. 06427        | H -3. 19515 -0. 73582 -2. 05473       |

|                              |                              |
|------------------------------|------------------------------|
| H -4.76492 -2.10186 -0.98033 | H -4.63327 -1.70469 0.138719 |
| H -3.67739 1.611664 -2.05582 | H -3.66687 1.683793 -2.00782 |
| H -4.90696 1.181262 -0.85761 | H -4.90772 1.174645 -0.85288 |
| H -3.78222 2.508334 -0.53301 | H -3.82198 2.516018 -0.45313 |
| H -4.05924 0.04338 1.437047  | H -4.05418 0.121034 1.478199 |
| H -3.11053 1.542355 1.529789 | H -3.01852 1.551593 1.558526 |
| H 3.595822 -2.9698 0.632308  | H 3.588017 -2.9763 0.610889  |
| H 3.510865 -2.97114 -1.15559 | H 3.516766 -2.95403 -1.17756 |
| H 5.08464 -3.1636 -0.33568   | H 5.084028 -3.15862 -0.34813 |

**Table S3.** Conformers and Boltzmann populations of 3 $\beta$ -OH isomer of **1**.

| <b>3<math>\beta</math>1 (46.15%)</b> | <b>3<math>\beta</math>2 (45.62%)</b> | <b>3<math>\beta</math>3 (8.23%)</b> |
|--------------------------------------|--------------------------------------|-------------------------------------|
| C 1.941671 -0.77581 -0.09939         | C 1.943799 -0.77349 -0.10511         | C 1.94132 -0.77485 -0.09879         |
| C 0.898418 0.151465 -0.04939         | C 0.900018 0.152633 -0.04962         | C 0.89835 0.152885 -0.04836         |
| C 1.206661 1.524348 -0.10651         | C 1.207574 1.526065 -0.09838         | C 1.206942 1.525684 -0.10544        |
| C 2.548512 1.922298 -0.21176         | C 2.549227 1.925754 -0.201           | C 2.54882 1.923428 -0.21295         |
| C 3.597651 1.01218 -0.27457          | C 3.598835 1.016753 -0.26925         | C 3.597501 1.013185 -0.27731        |
| C 3.27111 -0.35682 -0.21643          | C 3.272982 -0.35295 -0.21967         | C 3.270869 -0.3561 -0.21737         |
| C -0.56615 -0.26144 0.153777         | C -0.56344 -0.26564 0.150659         | C -0.56585 -0.26068 0.154867        |
| C -1.52124 0.730938 -0.57301         | C -1.52135 0.73383 -0.56113          | C -1.52279 0.735734 -0.56441        |
| C -1.14912 2.164769 -0.26346         | C -1.14869 2.166619 -0.24786         | C -1.1491 2.168692 -0.25207         |
| C 0.130542 2.510609 -0.06223         | C 0.131478 2.511696 -0.04819         | C 0.131741 2.512103 -0.0546         |
| C 5.035418 1.447565 -0.39323         | C 5.036374 1.45346 -0.38529          | C 5.035155 1.447937 -0.39805        |
| C -0.85677 -1.70205 -0.35921         | C -0.85498 -1.69824 -0.3852          | C -0.85537 -1.70101 -0.35971        |
| C -2.31906 -2.11517 -0.1477          | C -2.3166 -2.11923 -0.18235          | C -2.32071 -2.11916 -0.16265        |
| C -3.29522 -1.07577 -0.70594         | C -3.29736 -1.07618 -0.71279         | C -3.29883 -1.0799 -0.71844         |
| C -2.99023 0.369242 -0.22687         | C -2.98649 0.368661 -0.21093         | C -2.9918 0.369626 -0.2251          |
| O -3.24113 -1.04877 -2.13684         | O -3.22825 -1.15894 -2.13945         | O -3.35788 -1.14251 -2.1468         |
| C -4.01287 1.312666 -0.89185         | C -4.00354 1.329829 -0.86012         | C -4.01595 1.313017 -0.88415        |
| C -0.84932 -0.30648 1.675857         | C -0.84317 -0.3329 1.671945          | C -0.85027 -0.31128 1.677631        |
| O -0.02256 -0.64194 2.488654         | O -0.01494 -0.67804 2.478795         | O -0.02101 -0.65221 2.485601        |
| O -2.1263 -0.10631 2.101864          | O -2.12034 -0.14118 2.104835         | O -2.1233 -0.10603 2.104801         |
| C -3.15377 0.4991 1.292522           | C -3.14767 0.479799 1.310766         | C -3.15578 0.492817 1.295331        |
| O 4.337394 -1.21223 -0.2766          | O 4.339362 -1.20707 -0.28541         | O 4.336336 -1.21098 -0.27778        |
| C 4.099361 -2.60592 -0.17094         | C 4.101731 -2.60218 -0.19172         | C 4.100397 -2.60496 -0.16352        |
| H 1.725293 -1.83264 -0.0298          | H 1.727327 -1.83065 -0.04251         | H 1.725633 -1.83167 -0.02674        |
| H 2.776005 2.985946 -0.25233         | H 2.776041 2.989812 -0.23509         | H 2.776402 2.987016 -0.2532         |

|                                 |                                 |                                 |
|---------------------------------|---------------------------------|---------------------------------|
| H -1. 39384 0. 572838 -1. 65526 | H -1. 40206 0. 577778 -1. 64553 | H -1. 38347 0. 593969 -1. 65159 |
| H -1. 92028 2. 928655 -0. 27703 | H -1. 91988 2. 931028 -0. 25474 | H -1. 92137 2. 931052 -0. 25664 |
| H 0. 403323 3. 551522 0. 100598 | H 0. 404354 3. 551912 0. 119175 | H 0. 405232 3. 55189 0. 11379   |
| H 5. 110735 2. 538997 -0. 41783 | H 5. 11131 2. 545042 -0. 40389  | H 5. 111052 2. 539233 -0. 4233  |
| H 5. 633844 1. 079037 0. 448357 | H 5. 634774 1. 080499 0. 454363 | H 5. 634121 1. 079303 0. 443031 |
| H 5. 50023 1. 049293 -1. 30315  | H 5. 501429 1. 060208 -1. 29726 | H 5. 498478 1. 048698 -1. 30826 |
| H -0. 2094 -2. 41889 0. 153877  | H -0. 20882 -2. 42245 0. 119207 | H -0. 21292 -2. 41867 0. 157816 |
| H -0. 60911 -1. 73428 -1. 42638 | H -0. 6052 -1. 71659 -1. 4519   | H -0. 57429 -1. 74121 -1. 42204 |
| H -2. 50564 -3. 08265 -0. 63607 | H -2. 50731 -3. 06276 -0. 70514 | H -2. 50946 -3. 07614 -0. 66267 |
| H -2. 52271 -2. 27173 0. 917524 | H -2. 51749 -2. 29457 0. 879799 | H -2. 51848 -2. 27497 0. 903345 |
| H -4. 3198 -1. 32696 -0. 38199  | H -4. 31606 -1. 33571 -0. 37775 | H -4. 31774 -1. 33225 -0. 40038 |
| H -3. 4011 -1. 95113 -2. 45354  | H -3. 95498 -0. 63657 -2. 51024 | H -2. 45047 -1. 12911 -2. 48862 |
| H -3. 88984 1. 306827 -1. 97684 | H -3. 82111 1. 429784 -1. 93576 | H -3. 92503 1. 273501 -1. 97181 |
| H -5. 03456 0. 978916 -0. 67144 | H -5. 02896 0. 964074 -0. 71652 | H -5. 03586 0. 998459 -0. 63009 |
| H -3. 92175 2. 341982 -0. 53326 | H -3. 96054 2. 335429 -0. 43274 | H -3. 90306 2. 350381 -0. 55678 |
| H -4. 08943 0. 041442 1. 632556 | H -4. 08414 0. 019279 1. 645994 | H -4. 08714 0. 023131 1. 630603 |
| H -3. 18299 1. 56054 1. 563956  | H -3. 17344 1. 53699 1. 600037  | H -3. 19611 1. 551683 1. 575355 |
| H 5. 080792 -3. 08142 -0. 22325 | H 5. 083424 -3. 07659 -0. 24786 | H 5. 082531 -3. 07893 -0. 21359 |
| H 3. 621604 -2. 86261 0. 783502 | H 3. 62394 -2. 86684 0. 760435  | H 3. 623671 -2. 85603 0. 792783 |
| H 3. 475737 -2. 97385 -0. 99689 | H 3. 478359 -2. 96287 -1. 02086 | H 3. 47712 -2. 97855 -0. 98709  |



**Table S4.** DP4+ analysis table for compound **2** (isomer **1**: 6 $\alpha$ -OH; isomer **2**: 6 $\beta$ -OH).

| Functional            |      | Solvent? |             | Basis Set   |   |
|-----------------------|------|----------|-------------|-------------|---|
| mPW1PW91              |      | PCM      |             | 6-31+G(d,p) |   |
|                       |      |          |             |             |   |
| Isomer N <sup>o</sup> |      |          | 1           | 2           | 3 |
| DP4+ (%)              |      | H data   | 0.00%       | 100.00%     | - |
|                       |      | C data   | 0.00%       | 100.00%     | - |
|                       |      | All data | 0.00%       | 100.00%     | - |
| Type                  | sp2? | Exp      | 1           | 2           | 3 |
| C                     |      | 27       | 166.9032247 | 166.529575  |   |
| C                     |      | 78.5     | 116.7934818 | 116.806488  |   |
| C                     |      | 39.1     | 151.6956414 | 152.89649   |   |
| c                     |      | 56.8     | 148.2454013 | 137.615652  |   |
| c                     |      | 39.2     | 153.5290984 | 152.479861  |   |
| c                     |      | 25.9     | 167.5768392 | 167.609611  |   |
| c                     |      | 68.9     | 122.6160673 | 125.022165  |   |
| c                     |      | 72.9     | 118.1037707 | 120.823519  |   |
| c                     | x    | 125.9    | 70.7826572  | 72.0894995  |   |
| c                     | x    | 145.1    | 51.37148232 | 51.1426929  |   |
| c                     | x    | 129      | 71.24476556 | 69.4267738  |   |
| c                     | x    | 124.6    | 73.08509916 | 73.0708289  |   |
| c                     | x    | 158.3    | 40.89726929 | 40.6921424  |   |
| c                     | x    | 101.6    | 97.17987369 | 97.5057014  |   |
| c                     |      | 15.9     | 177.3707034 | 177.330815  |   |
| c                     |      | 65.8     | 127.5627827 | 129.543047  |   |
| c                     |      | 28.7     | 169.6653998 | 167.531664  |   |
| c                     |      | 15.4     | 179.5177543 | 179.92844   |   |
| c                     |      | 55.5     | 142.1017936 | 142.192915  |   |
|                       |      |          |             |             |   |
| H                     |      | 0.91     | 30.43274742 | 30.818264   |   |
| H                     |      | 1.88     | 29.95801379 | 29.8915114  |   |
| H                     |      | 1.73     | 29.79565981 | 29.8576739  |   |
| H                     |      | 3.4      | 28.22982641 | 28.148608   |   |
| H                     |      | 2.16     | 29.36782698 | 29.4270667  |   |
| H                     |      | 1.88     | 29.85722374 | 29.7747043  |   |
| H                     |      | 4.21     | 27.6502101  | 27.4409883  |   |
| H                     |      | 4.72     | 27.04143838 | 26.960035   |   |
| H                     | x    | 7.12     | 24.21051712 | 24.2096163  |   |
| H                     | x    | 6.67     | 24.76929582 | 24.7275913  |   |
| H                     |      | 2.22     | 29.3598753  | 29.338014   |   |
| H                     |      | 4.07     | 27.09451381 | 27.3561901  |   |
| H                     |      | 2.72     | 28.73106972 | 28.8548811  |   |
| H                     |      | 1.14     | 30.42756119 | 30.4905711  |   |
| H                     |      | 1.14     | 30.1676364  | 30.4267473  |   |
| H                     |      | 3.86     | 27.64320049 | 27.6226388  |   |

**Table S5.** Conformers and Boltzmann populations of 6 $\alpha$ -OH isomer of **2**.

| <b>6<math>\alpha</math>1 (52.98%)</b> | <b>6<math>\alpha</math>2 (26.20%)</b> | <b>6<math>\alpha</math>3 (20.82%)</b> |
|---------------------------------------|---------------------------------------|---------------------------------------|
| C 2. 237828 2. 146824 0. 890175       | C 2. 237042 2. 140624 0. 88706        | C 2. 22783 2. 158625 0. 871023        |
| C 2. 856339 1. 689916 -0. 42712       | C 2. 859168 1. 681081 -0. 43441       | C 2. 863252 1. 691807 -0. 44127       |
| C 2. 816024 0. 136741 -0. 58713       | C 2. 81804 0. 136438 -0. 598          | C 2. 818721 0. 13874 -0. 60201        |
| C 1. 301176 -0. 27778 -0. 52899       | C 1. 302602 -0. 2805 -0. 52861        | C 1. 304456 -0. 28401 -0. 52761       |
| C 0. 438756 0. 315256 0. 658973       | C 0. 439726 0. 311833 0. 659733       | C 0. 440835 0. 308818 0. 658602       |
| C 0. 746981 1. 799189 0. 919802       | C 0. 745373 1. 796186 0. 918351       | C 0. 74111 1. 795464 0. 911254        |
| C 0. 991022 -1. 823 -0. 66865         | C 0. 993017 -1. 82643 -0. 66589       | C 0. 993033 -1. 83052 -0. 66538       |
| C -0. 12728 -2. 16752 0. 333819       | C -0. 12959 -2. 16869 0. 333004       | C -0. 1341 -2. 17064 0. 32893         |
| C -1. 32062 -1. 28824 0. 132754       | C -1. 32166 -1. 28842 0. 131514       | C -1. 324 -1. 28911 0. 128275         |
| C -1. 02416 0. 069076 0. 285914       | C -1. 02395 0. 068066 0. 287915       | C -1. 02408 0. 065981 0. 288503       |
| C -2. 61596 -1. 6998 -0. 17982        | C -2. 61715 -1. 6982 -0. 18252        | C -2. 62005 -1. 69739 -0. 18575       |
| C -3. 64512 -0. 7735 -0. 34821        | C -3. 64558 -0. 77081 -0. 34933       | C -3. 64753 -0. 76871 -0. 34927       |
| C -3. 33689 0. 59349 -0. 17972        | C -3. 33631 0. 595374 -0. 1774        | C -3. 33656 0. 596812 -0. 1737        |
| C -2. 04041 1. 016874 0. 141235       | C -2. 03968 1. 016942 0. 145191       | C -2. 03937 1. 016162 0. 149296       |
| C -5. 05177 -1. 19391 -0. 69062       | C -5. 05228 -1. 1894 -0. 69385        | C -5. 05485 -1. 18469 -0. 6941        |
| C 0. 631295 -0. 54932 1. 934856       | C 0. 635324 -0. 55288 1. 934897       | C 0. 642785 -0. 55751 1. 931228       |
| O 4. 176536 2. 228559 -0. 47532       | O 4. 216301 2. 110112 -0. 55325       | O 4. 173953 2. 233548 -0. 60622       |
| H 0. 867368 0. 189651 -1. 42325       | H 0. 865306 0. 183309 -1. 42258       | H 0. 867849 0. 178764 -1. 42239       |
| C 3. 347521 -0. 22921 -1. 99185       | C 3. 344423 -0. 21778 -2. 00674       | C 3. 343083 -0. 21857 -2. 00958       |
| C 3. 771431 -0. 50007 0. 45208        | C 3. 778731 -0. 5042 0. 436002        | C 3. 780947 -0. 50273 0. 42714        |
| O 0. 470742 -1. 9467 1. 642556        | O 0. 463888 -1. 94909 1. 64446        | O 0. 457786 -1. 95348 1. 64258        |
| O 2. 079651 -2. 70322 -0. 42899       | O 2. 076061 -2. 71118 -0. 42033       | O 2. 071588 -2. 71986 -0. 40854       |
| O -4. 39395 1. 446435 -0. 34984       | O -4. 39286 1. 449753 -0. 34602       | O -4. 39193 1. 452521 -0. 33933       |
| C -4. 1778 2. 838642 -0. 19324        | C -4. 17541 2. 841249 -0. 18768       | C -4. 17223 2. 844122 -0. 1821        |
| H 2. 369755 3. 230734 0. 983621       | H 2. 356336 3. 229129 0. 989745       | H 2. 344893 3. 245838 0. 950821       |
| H 2. 778091 1. 694046 1. 729535       | H 2. 779099 1. 690352 1. 726297       | H 2. 764613 1. 722585 1. 725111       |
| H 2. 260047 2. 122926 -1. 25122       | H 2. 268263 2. 117764 -1. 26042       | H 2. 293654 2. 128716 -1. 27304       |
| H 0. 255501 2. 394976 0. 139535       | H 0. 255571 2. 388929 0. 134549       | H 0. 245143 2. 38178 0. 12704         |
| H 0. 295581 2. 109902 1. 871935       | H 0. 292331 2. 110624 1. 868457       | H 0. 288976 2. 110888 1. 861585       |
| H 0. 664227 -2. 04001 -1. 68997       | H 0. 670378 -2. 04349 -1. 68837       | H 0. 677026 -2. 04791 -1. 68979       |
| H -0. 3574 -3. 23495 0. 294884        | H -0. 36076 -3. 23581 0. 293573       | H -0. 36694 -3. 23743 0. 28894        |
| H -2. 83508 -2. 75967 -0. 29488       | H -2. 83687 -2. 75765 -0. 30014       | H -2. 84053 -2. 75635 -0. 3061        |
| H -1. 83351 2. 070487 0. 279556       | H -1. 83273 2. 070252 0. 285898       | H -1. 83204 2. 068939 0. 292486       |
| H -5. 12089 -2. 28225 -0. 78059       | H -5. 12241 -2. 27761 -0. 78458       | H -5. 12586 -2. 2724 -0. 7901         |
| H -5. 76491 -0. 86535 0. 074742       | H -5. 76613 -0. 86049 0. 070692       | H -5. 7675 -0. 85905 0. 072957        |
| H -5. 38381 -0. 74821 -1. 63592       | H -5. 38247 -0. 74289 -1. 63943       | H -5. 38578 -0. 73316 -1. 63697       |

|                                 |                                 |                                 |
|---------------------------------|---------------------------------|---------------------------------|
| H 1. 623932 -0. 42253 2. 375108 | H 1. 632633 -0. 43191 2. 366634 | H 1. 646614 -0. 4445 2. 351181  |
| H -0. 11085 -0. 24874 2. 688096 | H -0. 09944 -0. 24792 2. 693786 | H -0. 08058 -0. 24904 2. 699262 |
| H 4. 548758 2. 024453 -1. 34685 | H 4. 223864 3. 076049 -0. 47319 | H 4. 679446 2. 030252 0. 196037 |
| H 3. 273672 -1. 30638 -2. 16155 | H 3. 314176 -1. 29903 -2. 16639 | H 3. 356845 -1. 3024 -2. 15522  |
| H 4. 407785 0. 036494 -2. 09545 | H 4. 377469 0. 122655 -2. 12098 | H 4. 358506 0. 166742 -2. 1418  |
| H 2. 788065 0. 287205 -2. 78339 | H 2. 744341 0. 266689 -2. 78831 | H 2. 715587 0. 228823 -2. 79126 |
| H 3. 365632 -0. 52267 1. 466224 | H 3. 396035 -0. 4894 1. 460148  | H 3. 463887 -0. 38389 1. 467251 |
| H 4. 027222 -1. 52136 0. 170264 | H 3. 991065 -1. 53921 0. 170864 | H 3. 904999 -1. 56546 0. 228004 |
| H 4. 691567 0. 091542 0. 486195 | H 4. 719979 0. 052108 0. 431787 | H 4. 771944 -0. 04283 0. 330378 |
| H 2. 163661 -2. 73925 0. 541295 | H 2. 155977 -2. 74664 0. 550254 | H 2. 117565 -2. 77902 0. 563563 |
| H -5. 14371 3. 313704 -0. 37526 | H -5. 14073 3. 317665 -0. 36944 | H -5. 13696 3. 321647 -0. 36388 |
| H -3. 83954 3. 084094 0. 822279 | H -3. 83727 3. 085317 0. 828308 | H -3. 83353 3. 088306 0. 833615 |
| H -3. 44521 3. 218609 -0. 91777 | H -3. 44216 3. 221474 -0. 9115  | H -3. 43873 3. 222435 -0. 90651 |

**Table S6.** Conformers and Boltzmann populations of 6 $\beta$ -OH isomer of **2**.

| <b>6<math>\beta</math>1 (26.78%)</b> | <b>6<math>\beta</math>2 (23.81%)</b> | <b>6<math>\beta</math>3 (30.93%)</b> |
|--------------------------------------|--------------------------------------|--------------------------------------|
| C 2. 41495 2. 122268 0. 732579       | C 2. 409895 2. 128151 0. 703814      | C 2. 403378 2. 151761 0. 665434      |
| C 3. 062606 1. 470365 -0. 4864       | C 3. 078819 1. 451477 -0. 49812      | C 3. 099936 1. 450906 -0. 50734      |
| C 2. 879224 -0. 07758 -0. 5172       | C 2. 886717 -0. 08757 -0. 51506      | C 2. 889132 -0. 0932 -0. 51047       |
| C 1. 341606 -0. 37033 -0. 43396      | C 1. 344788 -0. 36853 -0. 4431       | C 1. 345518 -0. 3649 -0. 45634       |
| C 0. 519659 0. 395444 0. 676883      | C 0. 520027 0. 39994 0. 661932       | C 0. 52012 0. 408768 0. 641595       |
| C 0. 900373 1. 882055 0. 73384       | C 0. 895054 1. 888075 0. 701283      | C 0. 890448 1. 898443 0. 660869      |
| C 0. 971197 -1. 887 -0. 39181        | C 0. 963323 -1. 88253 -0. 40824      | C 0. 952438 -1. 87661 -0. 43024      |
| C -0. 09996 -2. 0937 0. 699515       | C -0. 09646 -2. 08879 0. 694772      | C -0. 09046 -2. 08237 0. 689294      |
| C -1. 2832 -1. 21951 0. 383165       | C -1. 2833 -1. 21731 0. 385016       | C -1. 28227 -1. 21455 0. 389771      |
| C -0. 95029 0. 141486 0. 34906       | C -0. 95121 0. 143424 0. 342459      | C -0. 9524 0. 146073 0. 333095       |
| C -2. 59225 -1. 62953 0. 126384      | C -2. 59375 -1. 62916 0. 13878       | C -2. 5945 -1. 63022 0. 159255       |
| C -3. 596 -0. 70381 -0. 16328        | C -3. 60005 -0. 70541 -0. 14827      | C -3. 6045 -0. 71002 -0. 12572       |
| C -3. 24891 0. 664282 -0. 18141      | C -3. 25378 0. 662663 -0. 17523      | C -3. 26013 0. 658356 -0. 168        |
| C -1. 93843 1. 089643 0. 075805      | C -1. 94193 1. 089828 0. 071259      | C -1. 94659 1. 089105 0. 062749      |
| C -5. 01593 -1. 12586 -0. 44355      | C -5. 02146 -1. 12963 -0. 41749      | C -5. 02785 -1. 13802 -0. 37799      |
| C 0. 701502 -0. 29787 2. 05435       | C 0. 711827 -0. 2876 2. 040777       | C 0. 722637 -0. 2716 2. 022158       |
| O 4. 431452 1. 874144 -0. 49419      | O 4. 480329 1. 724563 -0. 53555      | O 4. 47812 1. 818792 -0. 58064       |
| H 0. 933855 0. 00552 -1. 38304       | H 0. 949157 0. 011356 -1. 39533      | H 0. 965076 0. 020122 -1. 41249      |
| C 3. 381466 -0. 60574 -1. 88174      | C 3. 404148 -0. 62828 -1. 86768      | C 3. 424878 -0. 65386 -1. 84637      |
| C 3. 738216 -0. 73889 0. 582011      | C 3. 731628 -0. 73934 0. 602921      | C 3. 711117 -0. 73732 0. 630977      |

|                                 |                                 |                                 |
|---------------------------------|---------------------------------|---------------------------------|
| O 0. 502639 -1. 70909 1. 952231 | O 0. 513672 -1. 69933 1. 942546 | O 0. 538306 -1. 68598 1. 92648  |
| O 0. 550747 -2. 39549 -1. 654   | O 0. 520041 -2. 37804 -1. 66721 | O 0. 485127 -2. 35651 -1. 68586 |
| O -4. 28174 1. 51598 -0. 46451  | O -4. 28913 1. 51266 -0. 45558  | O -4. 29877 1. 504335 -0. 44617 |
| C -4. 02609 2. 910272 -0. 49547 | C -4. 03407 2. 906488 -0. 49639 | C -4. 04563 2. 898247 -0. 50466 |
| H 2. 623677 3. 197651 0. 702464 | H 2. 604082 3. 20976 0. 661782  | H 2. 602537 3. 227161 0. 592031 |
| H 2. 882978 1. 742124 1. 648069 | H 2. 872215 1. 769915 1. 63057  | H 2. 846749 1. 820894 1. 615105 |
| H 2. 559905 1. 872945 -1. 3852  | H 2. 603871 1. 847582 -1. 41466 | H 2. 671859 1. 843328 -1. 43983 |
| H 0. 476461 2. 386612 -0. 14526 | H 0. 474815 2. 376808 -0. 18864 | H 0. 471952 2. 370987 -0. 23835 |
| H 0. 438377 2. 35318 1. 611869  | H 0. 427491 2. 372609 1. 56902  | H 0. 416758 2. 394702 1. 518743 |
| H 1. 836097 -2. 49454 -0. 11934 | H 1. 827077 -2. 49936 -0. 1548  | H 1. 815805 -2. 50339 -0. 19948 |
| H -0. 35842 -3. 15089 0. 794456 | H -0. 35294 -3. 14591 0. 795175 | H -0. 34374 -3. 13937 0. 798545 |
| H -2. 84278 -2. 68831 0. 155747 | H -2. 84306 -2. 68803 0. 173717 | H -2. 84198 -2. 6891 0. 204538  |
| H -1. 69662 2. 145266 0. 066664 | H -1. 70127 2. 145663 0. 055369 | H -1. 7072 2. 144928 0. 035457  |
| H -5. 11586 -2. 21405 -0. 38781 | H -5. 12024 -2. 21762 -0. 35606 | H -5. 12487 -2. 22554 -0. 30649 |
| H -5. 71447 -0. 67861 0. 273587 | H -5. 71579 -0. 67951 0. 301962 | H -5. 71578 -0. 68248 0. 344152 |
| H -5. 34207 -0. 80005 -1. 43854 | H -5. 35409 -0. 80878 -1. 41195 | H -5. 37001 -0. 82579 -1. 37192 |
| H 1. 700117 -0. 13855 2. 46941  | H 1. 714318 -0. 12861 2. 446003 | H 1. 725655 -0. 10437 2. 423186 |
| H -0. 02487 0. 128635 2. 762495 | H -0. 00933 0. 139405 2. 754162 | H 0. 001359 0. 150063 2. 738343 |
| H 4. 827638 1. 563828 -1. 32278 | H 4. 58976 2. 686782 -0. 58003  | H 4. 887142 1. 584623 0. 267464 |
| H 3. 176119 -1. 67389 -1. 99835 | H 3. 278016 -1. 71327 -1. 9381  | H 3. 354568 -1. 74588 -1. 88312 |
| H 4. 466338 -0. 47226 -1. 98387 | H 4. 46527 -0. 39202 -1. 9871   | H 4. 472413 -0. 36681 -1. 97785 |
| H 2. 891192 -0. 08861 -2. 71626 | H 2. 858272 -0. 18139 -2. 70763 | H 2. 856066 -0. 26102 -2. 69736 |
| H 3. 42641 -0. 48133 1. 595676  | H 3. 50124 -0. 36218 1. 601722  | H 3. 573185 -0. 24884 1. 60008  |
| H 3. 722252 -1. 82995 0. 500866 | H 3. 598744 -1. 82488 0. 623668 | H 3. 462695 -1. 79278 0. 769323 |
| H 4. 775614 -0. 41044 0. 471247 | H 4. 789302 -0. 53556 0. 417577 | H 4. 778601 -0. 69173 0. 387187 |
| H -0. 28284 -1. 94655 -1. 87548 | H -0. 31082 -1. 91787 -1. 875   | H -0. 34948 -1. 89392 -1. 87238 |
| H -4. 97969 3. 383773 -0. 73657 | H -4. 98934 3. 378561 -0. 73378 | H -5. 00363 3. 366497 -0. 73836 |
| H -3. 67456 3. 278777 0. 477347 | H -3. 67602 3. 28092 0. 471865  | H -3. 67922 3. 283486 0. 456131 |
| H -3. 28813 3. 169382 -1. 26632 | H -3. 30137 3. 161366 -1. 27375 | H -3. 32047 3. 14509 -1. 29148  |

#### 6β4 (4.42%)

C 2. 397297 2. 12492 0. 749566  
C 3. 038484 1. 489432 -0. 48048  
C 2. 876214 -0. 06061 -0. 51353  
C 1. 341977 -0. 37545 -0. 42504  
C 0. 51017 0. 384762 0. 683905  
C 0. 885383 1. 872422 0. 754031  
C 0. 9999 -1. 88722 -0. 36382

#### 6β5 (3.81%)

C 2. 392497 2. 13196 0. 717998  
C 3. 056073 1. 469135 -0. 49364  
C 2. 884558 -0. 07214 -0. 51008  
C 1. 345306 -0. 37344 -0. 43308  
C 0. 510763 0. 389942 0. 669295  
C 0. 880398 1. 879274 0. 719571  
C 0. 9901 -1. 88233 -0. 38186

#### 6β6 (2.07%)

C 2. 389043 2. 145933 0. 692129  
C 3. 059722 1. 465235 -0. 50605  
C 2. 885895 -0. 07536 -0. 49505  
C 1. 346594 -0. 37255 -0. 43193  
C 0. 509586 0. 396857 0. 663077  
C 0. 877381 1. 887366 0. 699915  
C 0. 982554 -1. 88968 -0. 38414

|                              |                              |                              |
|------------------------------|------------------------------|------------------------------|
| C -0.1138 -2.09666 0.686462  | C -0.11034 -2.09126 0.682831 | C -0.10771 -2.09144 0.682126 |
| C -1.29108 -1.22292 0.366394 | C -1.29132 -1.2203 0.369902  | C -1.28873 -1.21913 0.36806  |
| C -0.95799 0.135377 0.345669 | C -0.95887 0.137709 0.339541 | C -0.95953 0.139351 0.334337 |
| C -2.59808 -1.63137 0.108249 | C -2.59974 -1.6308 0.12296   | C -2.59642 -1.63293 0.12321  |
| C -3.60088 -0.70422 -0.17741 | C -3.6051 -0.70585 -0.16074  | C -3.60408 -0.71015 -0.15902 |
| C -3.25327 0.663272 -0.18842 | C -3.25819 0.661577 -0.1819  | C -3.26083 0.658154 -0.18161 |
| C -1.94428 1.0866 0.075886   | C -1.94771 1.086949 0.071183 | C -1.95071 1.086887 0.066938 |
| C -5.02033 -1.1242 -0.46332  | C -5.02617 -1.12826 -0.43484 | C -5.02439 -1.13654 -0.43125 |
| C 0.683696 -0.31538 2.059673 | C 0.693968 -0.30388 2.046772 | C 0.692851 -0.29294 2.041907 |
| O 4.402085 1.911484 -0.50582 | O 4.453579 1.761756 -0.54867 | O 4.457953 1.753555 -0.55812 |
| H 0.91784 -0.02853 -1.37603  | H 0.934365 -0.02041 -1.38731 | H 0.941549 -0.01048 -1.38635 |
| C 3.384065 -0.57755 -1.87997 | C 3.406788 -0.60491 -1.86378 | C 3.426412 -0.6343 -1.83182  |
| C 3.75071 -0.70866 0.582052  | C 3.744971 -0.70926 0.604811 | C 3.73475 -0.69403 0.639277  |
| O 0.472221 -1.72645 1.953514 | O 0.485733 -1.71575 1.943943 | O 0.493232 -1.70486 1.938307 |
| O 0.61366 -2.3032 -1.67424   | O 0.576087 -2.28012 -1.6889  | O 0.478245 -2.38417 -1.62255 |
| O -4.28649 1.517897 -0.46908 | O -4.29398 1.514342 -0.46036 | O -4.29971 1.508726 -0.45786 |
| C -4.02575 2.910229 -0.50371 | C -4.03368 2.906071 -0.50683 | C -4.04363 2.900853 -0.50132 |
| H 2.597412 3.202185 0.728615 | H 2.577499 3.215478 0.682527 | H 2.569415 3.229379 0.636992 |
| H 2.873809 1.738799 1.658261 | H 2.863575 1.770554 1.639163 | H 2.86122 1.803834 1.619878  |
| H 2.518773 1.888358 -1.3708  | H 2.564528 1.860288 -1.40324 | H 2.57356 1.842394 -1.42472  |
| H 0.456071 2.382403 -0.11894 | H 0.454507 2.371965 -0.16513 | H 0.446927 2.371139 -0.18747 |
| H 0.421662 2.331611 1.637366 | H 0.411253 2.353433 1.592068 | H 0.41077 2.369012 1.569573  |
| H 1.865639 -2.46827 -0.02188 | H 1.855656 -2.47579 -0.06286 | H 1.847045 -2.4857 -0.06732  |
| H -0.38016 -3.15495 0.779611 | H -0.37448 -3.14942 0.782252 | H -0.36678 -3.14801 0.778994 |
| H -2.84976 -2.69028 0.128014 | H -2.85032 -2.68981 0.149554 | H -2.84141 -2.69282 0.145914 |
| H -1.70262 2.142236 0.074563 | H -1.70723 2.142847 0.062206 | H -1.71293 2.143445 0.056799 |
| H -5.12156 -2.21256 -0.40999 | H -5.12623 -2.21638 -0.37478 | H -5.12042 -2.225 -0.37258   |
| H -5.72206 -0.67769 0.251313 | H -5.72353 -0.67828 0.281918 | H -5.72198 -0.68964 0.287273 |
| H -5.34174 -0.79705 -1.45945 | H -5.35436 -0.80698 -1.43067 | H -5.35513 -0.81519 -1.42622 |
| H 1.682723 -0.16651 2.478392 | H 1.696195 -0.15398 2.456846 | H 1.693037 -0.13767 2.45544  |
| H -0.04163 0.113305 2.767036 | H -0.0275 0.124209 2.7587    | H -0.03243 0.133653 2.751036 |
| H 4.787846 1.616586 -1.34486 | H 4.548006 2.725621 -0.59079 | H 4.556825 2.717292 -0.59415 |
| H 3.187413 -1.64686 -1.99961 | H 3.29002 -1.69101 -1.93447  | H 3.385845 -1.73104 -1.8508  |
| H 4.467746 -0.43323 -1.98081 | H 4.465678 -0.35889 -1.98362 | H 4.470669 -0.34181 -1.97179 |
| H 2.887224 -0.06373 -2.7123  | H 2.854715 -0.1637 -2.70218  | H 2.853169 -0.25304 -2.68694 |
| H 3.410856 -0.49611 1.59727  | H 3.48405 -0.36835 1.609142  | H 3.503126 -0.28765 1.625738 |
| H 3.789532 -1.79671 0.470822 | H 3.663062 -1.80016 0.597705 | H 3.602539 -1.7784 0.693548  |
| H 4.772209 -0.32723 0.495359 | H 4.794185 -0.45271 0.437643 | H 4.792099 -0.4929 0.448257  |

|                              |                              |                              |
|------------------------------|------------------------------|------------------------------|
| H 0.472913 -3.26345 -1.65103 | H 0.449798 -3.24249 -1.68006 | H 1.186318 -2.30331 -2.27963 |
| H -4.97677 3.387213 -0.74886 | H -4.98639 3.381405 -0.74881 | H -4.99826 3.374438 -0.73934 |
| H -3.67537 3.281432 0.468792 | H -3.67659 3.28453 0.460524  | H -3.68467 3.278054 0.465929 |
| H -3.28438 3.164507 -1.27305 | H -3.29765 3.154957 -1.28313 | H -3.31046 3.154425 -1.27902 |

### 6β7 (1.47%)

C 2.39374 2.142518 0.710214  
C 3.055623 1.477677 -0.49443  
C 2.884014 -0.07226 -0.49257  
C 1.345875 -0.37423 -0.43049  
C 0.510197 0.39433 0.667645  
C 0.882738 1.883379 0.715477  
C 0.981524 -1.89202 -0.38261  
C -0.10938 -2.09395 0.683195  
C -1.28911 -1.21973 0.36833  
C -0.95836 0.138497 0.334983  
C -2.59686 -1.63201 0.121071  
C -3.60279 -0.70788 -0.16293  
C -3.25786 0.660126 -0.18503  
C -1.9476 1.087311 0.065698  
C -5.02324 -1.13239 -0.43734  
C 0.685622 -0.29823 2.046352  
O 4.422377 1.891531 -0.49563  
H 0.938029 -0.01056 -1.38356  
C 3.419445 -0.62848 -1.83295  
C 3.735981 -0.69679 0.633641  
O 0.492901 -1.71062 1.939225  
O 0.474688 -2.38821 -1.61973  
O -4.29503 1.511776 -0.46306  
C -4.03765 2.904022 -0.5037  
H 2.58883 3.219646 0.659918  
H 2.866015 1.786656 1.633072  
H 2.557741 1.860597 -1.40403  
H 0.452101 2.377365 -0.16612  
H 0.417642 2.356848 1.590454  
H 1.846495 -2.48755 -0.06484  
H -0.36966 -3.15048 0.77746  
H -2.84338 -2.69156 0.143495

### 6β8 (4.47%)

C 2.386029 2.155687 0.677909  
C 3.077885 1.467584 -0.50411  
C 2.887635 -0.07929 -0.50457  
C 1.346329 -0.37046 -0.44499  
C 0.51105 0.398239 0.649895  
C 0.876075 1.889241 0.678838  
C 0.978087 -1.87704 -0.40444  
C -0.10541 -2.0851 0.678138  
C -1.29109 -1.2175 0.375723  
C -0.96006 0.140247 0.330936  
C -2.6014 -1.63138 0.14465  
C -3.61002 -0.70966 -0.13755  
C -3.2643 0.657884 -0.17453  
C -1.95193 1.086425 0.063045  
C -5.03326 -1.13534 -0.39464  
C 0.704791 -0.28842 2.029088  
O 4.450476 1.853901 -0.59407  
H 0.950854 -0.01021 -1.40295  
C 3.426808 -0.6339 -1.84139  
C 3.726264 -0.70748 0.633193  
O 0.510501 -1.70298 1.92851  
O 0.53945 -2.25546 -1.70834  
O -4.3029 1.507084 -0.45135  
C -4.04378 2.89862 -0.51613  
H 2.575072 3.233327 0.609458  
H 2.838748 1.822445 1.622449  
H 2.632985 1.854446 -1.43088  
H 0.451255 2.365075 -0.2153  
H 0.401431 2.375831 1.541598  
H 1.843773 -2.48324 -0.10921  
H -0.36637 -3.14314 0.786588  
H -2.8508 -2.69035 0.182411

### 6β9 (2.47%)

C 2.384377 2.164814 0.661537  
C 3.080005 1.465629 -0.51174  
C 2.886535 -0.08027 -0.49504  
C 1.346082 -0.36982 -0.44332  
C 0.50949 0.404635 0.646062  
C 0.874245 1.896089 0.665668  
C 0.972857 -1.88547 -0.40055  
C -0.10364 -2.08536 0.680063  
C -1.28869 -1.21615 0.374145  
C -0.96089 0.142115 0.327221  
C -2.59792 -1.63309 0.143029  
C -3.60834 -0.7133 -0.13861  
C -3.26622 0.65515 -0.17566  
C -1.95457 1.086857 0.059444  
C -5.03042 -1.14272 -0.39625  
C 0.702113 -0.2779 2.026848  
O 4.454178 1.846103 -0.60187  
H 0.9519 -0.00319 -1.40054  
C 3.437324 -0.64981 -1.82169  
C 3.718755 -0.69893 0.65292  
O 0.514124 -1.69209 1.926974  
O 0.449874 -2.36968 -1.63469  
O -4.30746 1.502335 -0.45129  
C -4.05226 2.894322 -0.51205  
H 2.571898 3.241906 0.581627  
H 2.837031 1.842604 1.609855  
H 2.63854 1.84419 -1.44379  
H 0.447276 2.366501 -0.23033  
H 0.401452 2.388201 1.526209  
H 1.838193 -2.48967 -0.10079  
H -0.36017 -3.1417 0.785589  
H -2.84181 -2.69298 0.17566

|                                 |                                 |                                 |
|---------------------------------|---------------------------------|---------------------------------|
| H -1. 70794 2. 143419 0. 056248 | H -1. 71237 2. 142304 0. 042359 | H -1. 71742 2. 143347 0. 03836  |
| H -5. 1209 -2. 22071 -0. 37878  | H -5. 13215 -2. 22293 -0. 32382 | H -5. 12541 -2. 2307 -0. 32787  |
| H -5. 72127 -0. 68449 0. 280118 | H -5. 72415 -0. 67919 0. 324452 | H -5. 72261 -0. 69018 0. 32394  |
| H -5. 35208 -0. 81054 -1. 43277 | H -5. 37072 -0. 82315 -1. 39023 | H -5. 36893 -0. 82964 -1. 39121 |
| H 1. 680495 -0. 13852 2. 470663 | H 1. 707629 -0. 13046 2. 43506  | H 1. 702959 -0. 11512 2. 436584 |
| H -0. 04764 0. 125136 2. 749028 | H -0. 01692 0. 134259 2. 743783 | H -0. 02295 0. 144993 2. 738192 |
| H 4. 814932 1. 630536 -1. 34227 | H 4. 867214 1. 646263 0. 257084 | H 4. 863954 1. 663076 0. 258343 |
| H 3. 32672 -1. 72055 -1. 8795   | H 3. 366483 -1. 72677 -1. 87641 | H 3. 424136 -1. 74739 -1. 82608 |
| H 4. 488358 -0. 41366 -1. 95561 | H 4. 471449 -0. 33741 -1. 97513 | H 4. 472994 -0. 32941 -1. 968   |
| H 2. 886417 -0. 20146 -2. 6925  | H 2. 851204 -0. 24838 -2. 69069 | H 2. 855115 -0. 29436 -2. 68161 |
| H 3. 44438 -0. 36699 1. 631808  | H 3. 553986 -0. 2494 1. 611311  | H 3. 556062 -0. 21452 1. 619493 |
| H 3. 6822 -1. 78943 0. 62114    | H 3. 529518 -1. 77723 0. 742815 | H 3. 501063 -1. 7613 0. 789543  |
| H 4. 781921 -0. 40848 0. 494376 | H 4. 792795 -0. 605 0. 402388   | H 4. 7864 -0. 61928 0. 418313   |
| H 1. 174105 -2. 2963 -2. 28424  | H 0. 392769 -3. 21502 -1. 70657 | H 1. 151958 -2. 29547 -2. 29908 |
| H -4. 99148 3. 378676 -0. 74264 | H -4. 99894 3. 370525 -0. 75493 | H -5. 00893 3. 364717 -0. 74798 |
| H -3. 68012 3. 279077 0. 464828 | H -3. 67836 3. 288161 0. 443634 | H -3. 68625 3. 282095 0. 448302 |
| H -3. 30287 3. 158208 -1. 2796  | H -3. 31493 3. 138736 -1. 30178 | H -3. 32517 3. 139317 -1. 29802 |

**Table S7.** DP4+ analysis table for compound **6** (isomer **1**: 2 $\alpha$ ,10 $\alpha$ -OH; isomer **2**: 2 $\beta$ ,10 $\alpha$ -OH; isomer **3**: 2 $\alpha$ ,10 $\beta$ -OH; isomer **4**: 2 $\beta$ ,10 $\beta$ -OH).

| Functional |      | Solvent? |             | Basis Set   |            |            |
|------------|------|----------|-------------|-------------|------------|------------|
| mPW1PW91   |      | PCM      |             | 6-31+G(d,p) |            |            |
|            |      |          |             |             |            |            |
| Isomer N°  |      |          | 1           | 2           | 3          | 4          |
| DP4+ (%)   |      | H data   | 100.00%     | 0.00%       | 0.00%      | 0.00%      |
|            |      | C data   | 100.00%     | 0.00%       | 0.00%      | 0.00%      |
|            |      | All data | 100.00%     | 0.00%       | 0.00%      | 0.00%      |
| Type       | sp2? | Exp      | 1           | 2           | 3          | 4          |
| C          |      | 72.7     | 120.7953331 | 127.020847  | 126.211219 | 124.442926 |
| C          |      | 77.7     | 116.5362693 | 116.694796  | 114.929367 | 119.014128 |
| C          |      | 37.3     | 153.9252959 | 152.490488  | 155.170259 | 154.171779 |
| C          |      | 50       | 143.3648261 | 142.043119  | 140.297437 | 140.103775 |
| C          |      | 79.7     | 112.4088318 | 123.48581   | 103.278112 | 108.419972 |
| C          |      | 39.1     | 156.0973405 | 152.299242  | 152.504518 | 155.529593 |
| C          | x    | 127.8    | 68.74998702 | 69.7097748  | 64.2909436 | 66.5446592 |
| C          | x    | 131.4    | 65.66996402 | 67.949571   | 66.301696  | 66.5728773 |
| C          | x    | 128.5    | 69.9068492  | 71.40063    | 67.3098119 | 68.9206392 |
| C          | x    | 134.2    | 61.83062617 | 63.0448967  | 60.1248338 | 61.1021805 |
| C          |      | 51       | 143.6634072 | 143.901219  | 144.300485 | 145.487762 |
| C          | x    | 132.2    | 66.47120351 | 64.8270532  | 68.3394601 | 66.909215  |
| C          | x    | 124.9    | 72.13857427 | 72.4637203  | 72.0923715 | 72.0763857 |
| C          | x    | 157.1    | 41.93049285 | 41.8105599  | 42.7036606 | 42.2558289 |
| C          | x    | 112.1    | 88.01266816 | 87.1747742  | 88.9495896 | 87.9801737 |
| C          |      | 15.7     | 177.3512926 | 177.510522  | 177.233878 | 177.381132 |
| C          |      | 22.6     | 173.8083769 | 174.504133  | 169.285563 | 169.615151 |
| C          |      | 28.3     | 168.20238   | 168.965692  | 173.345005 | 169.563666 |
| C          |      | 55.4     | 142.0480025 | 141.99879   | 142.029988 | 142.002335 |
| H          |      | 2.39     | 28.98027259 | 28.7309236  | 29.9403773 | 29.4400876 |
| H          |      | 4        | 27.65355522 | 27.2137399  | 27.5696957 | 27.5766669 |
| H          |      | 3.63     | 27.98681306 | 27.9937538  | 28.0491576 | 28.0410469 |
| H          |      | 2.25     | 29.26460226 | 29.6443504  | 29.9015043 | 29.3582693 |
| H          |      | 1.95     | 29.74291214 | 29.8047291  | 29.5093268 | 29.7069854 |
| H          | x    | 5.85     | 25.35061201 | 25.6049567  | 24.9943284 | 25.2235858 |
| H          | x    | 6.61     | 24.488405   | 24.7195182  | 24.4952257 | 24.5718205 |
| H          |      | 2.95     | 28.65257945 | 28.3044752  | 28.8461367 | 28.9933741 |
| H          |      | 2.68     | 28.88944676 | 28.8944254  | 29.2406099 | 28.6411592 |
| H          | x    | 6.96     | 24.29783461 | 24.3481814  | 24.2194392 | 24.2537939 |
| H          | x    | 6.58     | 24.78408735 | 24.84541    | 24.6651408 | 24.735873  |
| H          |      | 2.18     | 29.36601359 | 29.3816894  | 29.343001  | 29.338541  |
| H          |      | 1.25     | 30.41075391 | 30.5438934  | 30.6497439 | 30.6399623 |
| H          |      | 1.03     | 30.63006629 | 30.423395   | 30.4301909 | 30.4725995 |
| H          |      | 3.84     | 27.63462954 | 27.6419699  | 27.6233845 | 27.6472857 |



**Table S8.** Conformers and Boltzmann populations of 2 $\alpha$ ,10 $\alpha$ -OH isomer of **6**.

| <b>2<math>\alpha</math>10<math>\alpha</math>1 (21.64%)</b> | <b>2<math>\alpha</math>10<math>\alpha</math>2 (36.78%)</b> | <b>2<math>\alpha</math>10<math>\alpha</math>3 (11.89%)</b> |
|------------------------------------------------------------|------------------------------------------------------------|------------------------------------------------------------|
| C -3.16462 -1.77871 0.386831                               | C -3.1668 -1.79014 0.377929                                | C 2.885733 -1.74389 0.546028                               |
| C -3.93889 -0.48279 0.057025                               | C -3.9383 -0.49699 0.049076                                | C 3.042049 -0.44262 1.371303                               |
| C -3.1218 0.833814 0.161924                                | C -3.11862 0.825041 0.171262                               | C 2.72213 0.874681 0.608689                                |
| C -1.75105 0.662447 -0.60737                               | C -1.75089 0.658389 -0.60123                               | C 1.346458 0.709815 -0.12276                               |
| C -0.97302 -0.63909 -0.26787                               | C -0.97167 -0.64403 -0.26553                               | C 1.207388 -0.58222 -0.98163                               |
| C -1.88425 -1.86133 -0.45051                               | C -1.8818 -1.86707 -0.45189                                | C 1.502069 -1.81193 -0.11545                               |
| C -0.922 1.926428 -0.55061                                 | C -0.92381 1.923745 -0.54861                               | C 0.874181 1.950583 -0.85179                               |
| C 0.402445 2.147337 -0.4273                                | C 0.400376 2.146818 -0.4263                                | C -0.42957 2.218508 -1.05778                               |
| C 1.553877 1.241658 -0.31841                               | C 1.552786 1.242668 -0.31789                               | C -1.51851 1.300499 -0.69204                               |
| C 1.526589 -0.12578 -0.65635                               | C 1.526626 -0.12469 -0.65671                               | C -1.38321 -0.09338 -0.86827                               |
| C 0.275419 -0.78658 -1.18568                               | C 0.275838 -0.7867 -1.18538                                | C -0.20315 -0.6524 -1.63402                                |
| C 2.775568 1.789206 0.128073                               | C 2.774011 1.791681 0.12822                                | C -2.71762 1.7978 -0.15059                                 |
| C 3.941039 1.048175 0.270742                               | C 3.940256 1.051869 0.270229                               | C -3.75512 0.973069 0.268851                               |
| C 3.882823 -0.32243 -0.05587                               | C 3.883298 -0.31881 -0.0568                                | C -3.58347 -0.42014 0.122927                               |
| C 2.690275 -0.89053 -0.50915                               | C 2.691246 -0.88808 -0.51004                               | C -2.42 -0.93826 -0.45063                                  |
| C 5.230606 1.660584 0.754187                               | C 5.229382 1.665317 0.753477                               | C -5.02661 1.521445 0.864485                               |
| C -2.94288 1.231586 1.644681                               | C -2.94678 1.219832 1.654966                               | C 3.90318 1.235619 -0.32223                                |
| C -3.96015 1.953611 -0.50361                               | C -3.95445 1.948812 -0.49197                               | C 2.595409 2.021053 1.638647                               |
| H -2.05244 0.536415 -1.65872                               | H -2.05776 0.527741 -1.65087                               | H 0.618234 0.54363 0.682832                                |
| O -0.56329 -0.69389 1.115971                               | O -0.55975 -0.69979 1.117301                               | O 2.171687 -0.6457 -2.06154                                |
| O -4.41597 -0.58005 -1.2953                                | O -4.40574 -0.70428 -1.29402                               | O 2.147647 -0.51551 2.49253                                |
| O -2.92403 -1.94502 1.776737                               | O -2.92859 -1.94312 1.771176                               | O 3.943422 -1.93934 -0.38306                               |
| O 5.051633 -1.01179 0.101615                               | O 5.05264 -1.00684 0.100243                                | O -4.63048 -1.18432 0.558575                               |
| C 5.069524 -2.39759 -0.20263                               | C 5.071801 -2.39301 -0.2033                                | C -4.53553 -2.59448 0.442506                               |
| H -3.82146 -2.61559 0.1006                                 | H -3.8261 -2.61536 0.084454                                | H 2.96848 -2.57636 1.262576                                |
| H -4.78973 -0.40651 0.752055                               | H -4.79328 -0.43323 0.739492                               | H 4.08396 -0.38826 1.723691                                |
| H -2.15192 -1.94327 -1.50937                               | H -2.14539 -1.95343 -1.51151                               | H 0.731799 -1.88154 0.659978                               |
| H -1.3278 -2.764 -0.17173                                  | H -1.32398 -2.76797 -0.16947                               | H 1.442823 -2.71601 -0.7335                                |
| H -1.51778 2.831964 -0.63226                               | H -1.51952 2.82974 -0.62993                                | H 1.609242 2.693654 -1.1533                                |
| H 0.69026 3.198277 -0.38792                                | H 0.686755 3.198195 -0.38761                               | H -0.7136 3.181965 -1.48135                                |
| H 0.031582 -0.3843 -2.1782                                 | H 0.03005 -0.38323 -2.17696                                | H -0.12801 -0.08764 -2.57255                               |
| H 0.48007 -1.85429 -1.32225                                | H 0.481671 -1.85376 -1.32413                               | H -0.39561 -1.6935 -1.9175                                 |
| H 2.80529 2.848277 0.377345                                | H 2.802675 2.85071 0.377864                                | H -2.83187 2.874319 -0.03771                               |
| H 2.650065 -1.94384 -0.76371                               | H 2.652028 -1.94132 -0.76494                               | H -2.31272 -2.00685 -0.6029                                |
| H 6.029827 1.545249 0.012421                               | H 6.028504 1.550814 0.011482                               | H -5.18154 1.151248 1.885008                               |
| H 5.102238 2.727767 0.958881                               | H 5.100147 2.732345 0.95847                                | H -5.00135 2.614913 0.895933                               |

|                                 |                                 |                                 |
|---------------------------------|---------------------------------|---------------------------------|
| H 5. 58475 1. 173849 1. 670732  | H 5. 584155 1. 17864 1. 669801  | H -5. 905 1. 212655 0. 285342   |
| H -2. 49175 0. 448939 2. 250543 | H -2. 48669 0. 43782 2. 254153  | H 4. 151844 0. 45108 -1. 03366  |
| H -2. 31934 2. 129501 1. 72221  | H -2. 33511 2. 125437 1. 740444 | H 3. 695094 2. 156229 -0. 87992 |
| H -3. 91905 1. 468667 2. 084392 | H -3. 92638 1. 439835 2. 096903 | H 4. 798709 1. 426447 0. 280752 |
| H -3. 56175 2. 946225 -0. 26898 | H -3. 56927 2. 943062 -0. 24642 | H 2. 466718 2. 983846 1. 131518 |
| H -4. 01166 1. 841219 -1. 58922 | H -3. 97976 1. 863024 -1. 58395 | H 1. 749798 1. 868565 2. 312422 |
| H -4. 98681 1. 922047 -0. 12069 | H -4. 98722 1. 919365 -0. 1179  | H 3. 504113 2. 085382 2. 249401 |
| H -0. 01437 0. 085224 1. 304508 | H 0. 00332 0. 070126 1. 301837  | H 2. 126478 0. 195645 -2. 54561 |
| H -4. 97273 -1. 37243 -1. 34983 | H -5. 09082 -0. 04529 -1. 47677 | H 2. 382667 -1. 30837 2. 999275 |
| H -2. 04533 -1. 55882 1. 946906 | H -2. 04552 -1. 56837 1. 940693 | H 3. 638103 -1. 55408 -1. 22458 |
| H 6. 087925 -2. 73466 -0. 0007  | H 6. 090552 -2. 72888 -0. 00123 | H -4. 4472 -2. 90877 -0. 60592  |
| H 4. 369123 -2. 95819 0. 430057 | H 4. 371972 -2. 95375 0. 429806 | H -3. 68215 -2. 98936 1. 009399 |
| H 4. 828937 -2. 58186 -1. 25789 | H 4. 831316 -2. 57794 -1. 25842 | H -5. 46209 -2. 99234 0. 860751 |

### 2 $\alpha$ 10 $\alpha$ 4 (24.00%)

C 2. 877282 -1. 75026 0. 560856  
 C 3. 026565 -0. 45009 1. 381388  
 C 2. 719136 0. 8701 0. 603745  
 C 1. 347829 0. 705597 -0. 13225  
 C 1. 209908 -0. 59048 -0. 98547  
 C 1. 500554 -1. 81762 -0. 11383  
 C 0. 877655 1. 944782 -0. 86487  
 C -0. 4258 2. 214339 -1. 07146  
 C -1. 51524 1. 298335 -0. 70264  
 C -1. 37982 -0. 09642 -0. 87343  
 C -0. 20078 -0. 6593 -1. 63815  
 C -2. 71406 1. 79811 -0. 16268  
 C -3. 7508 0. 975079 0. 261838  
 C -3. 57837 -0. 41893 0. 123227  
 C -2. 4157 -0. 93936 -0. 45002  
 C -5. 02215 1. 525627 0. 855758  
 C 3. 909084 1. 228961 -0. 31515  
 C 2. 583913 2. 023026 1. 626314  
 H 0. 618271 0. 538304 0. 672425  
 O 2. 17486 -0. 65658 -2. 06402  
 O 2. 131094 -0. 63608 2. 487842  
 O 3. 943214 -1. 93169 -0. 36356  
 O -4. 62357 -1. 18123 0. 564985

### 2 $\alpha$ 10 $\alpha$ 14 (1.78%)

C 2. 873925 -1. 74938 0. 569382  
 C 3. 032847 -0. 44276 1. 386639  
 C 2. 720967 0. 875234 0. 605483  
 C 1. 350056 0. 708895 -0. 13629  
 C 1. 20852 -0. 5899 -0. 98772  
 C 1. 498864 -1. 81795 -0. 11484  
 C 0. 878525 1. 946457 -0. 871  
 C -0. 4256 2. 214222 -1. 07511  
 C -1. 51398 1. 298425 -0. 70184  
 C -1. 38044 -0. 0965 -0. 87404  
 C -0. 20232 -0. 65898 -1. 64048  
 C -2. 71066 1. 798548 -0. 15697  
 C -3. 74715 0. 976032 0. 269061  
 C -3. 57773 -0. 41826 0. 126457  
 C -2. 41642 -0. 93939 -0. 44948  
 C -5. 01624 1. 527259 0. 867024  
 C 3. 90507 1. 224905 -0. 32576  
 C 2. 593282 2. 03119 1. 623041  
 H 0. 602081 0. 555534 0. 658467  
 O 2. 173716 -0. 65952 -2. 06206  
 O 2. 259569 -0. 56005 2. 589855  
 O 3. 933815 -1. 95189 -0. 35873  
 O -4. 62316 -1. 17927 0. 567907

### 2 $\alpha$ 10 $\alpha$ 15 (1.32%)

C 2. 853166 -1. 74052 0. 594148  
 C 3. 022577 -0. 42171 1. 388017  
 C 2. 722418 0. 881474 0. 59103  
 C 1. 353237 0. 710072 -0. 15062  
 C 1. 204251 -0. 59686 -0. 97373  
 C 1. 466649 -1. 80817 -0. 06445  
 C 0. 886572 1. 937971 -0. 90201  
 C -0. 4153 2. 213897 -1. 09656  
 C -1. 50517 1. 303533 -0. 70709  
 C -1. 37685 -0. 09073 -0. 88166  
 C -0. 19452 -0. 65113 -1. 64441  
 C -2. 69775 1. 802942 -0. 15487  
 C -3. 73515 0. 98083 0. 271902  
 C -3. 56989 -0. 41248 0. 12452  
 C -2. 41161 -0. 93417 -0. 4563  
 C -5. 0003 1. 5336 0. 87706  
 C 3. 911745 1. 223222 -0. 33582  
 C 2. 591045 2. 049054 1. 596822  
 H 0. 623051 0. 559985 0. 656184  
 O 2. 190758 -0. 59475 -2. 04726  
 O 2. 122488 -0. 45911 2. 507153  
 O 3. 903078 -1. 96534 -0. 33699  
 O -4. 61684 -1. 17395 0. 56778

|                                 |                                 |                                 |
|---------------------------------|---------------------------------|---------------------------------|
| C -4. 52497 -2. 59266 0. 462667 | C -4. 53495 -2. 59032 0. 449222 | C -4. 52637 -2. 58374 0. 451238 |
| H 2. 954618 -2. 56919 1. 285333 | H 2. 947853 -2. 56462 1. 298592 | H 2. 93453 -2. 55953 1. 324991  |
| H 4. 065575 -0. 40382 1. 742331 | H 4. 069357 -0. 39702 1. 736441 | H 4. 063378 -0. 37212 1. 743663 |
| H 0. 72493 -1. 8911 0. 655982   | H 0. 703512 -1. 90678 0. 637181 | H 0. 694527 -1. 84444 0. 712249 |
| H 1. 448054 -2. 72186 -0. 73258 | H 1. 451934 -2. 72233 -0. 73311 | H 1. 393095 -2. 73587 -0. 64853 |
| H 1. 614836 2. 683725 -1. 17231 | H 1. 615921 2. 685365 -1. 17595 | H 1. 630734 2. 650583 -1. 24766 |
| H -0. 70851 3. 176275 -1. 49951 | H -0. 70978 3. 175956 -1. 50216 | H -0. 69849 3. 164859 -1. 54761 |
| H -0. 12558 -0. 09746 -2. 57852 | H -0. 12659 -0. 09631 -2. 58007 | H -0. 09385 -0. 07043 -2. 56988 |
| H -0. 39486 -1. 70095 -1. 91796 | H -0. 396 -1. 70046 -1. 92129   | H -0. 40221 -1. 69118 -1. 93196 |
| H -2. 82878 2. 875206 -0. 05528 | H -2. 82384 2. 875491 -0. 0476  | H -2. 80813 2. 879728 -0. 04114 |
| H -2. 30785 -2. 00864 -0. 59635 | H -2. 31184 -2. 00843 -0. 60061 | H -2. 30761 -2. 00352 -0. 60635 |
| H -5. 17657 1. 159706 1. 877904 | H -5. 16902 1. 159202 1. 888594 | H -5. 14946 1. 163052 1. 898327 |
| H -4. 99749 2. 619276 0. 882266 | H -4. 98985 2. 620696 0. 895947 | H -4. 97047 2. 62691 0. 909272  |
| H -5. 90069 1. 213913 0. 278442 | H -5. 89617 1. 217897 0. 290668 | H -5. 88401 1. 228815 0. 303878 |
| H 4. 155949 0. 442683 -1. 02475 | H 4. 154609 0. 431417 -1. 02671 | H 4. 122158 0. 462154 -1. 0835  |
| H 3. 713581 2. 152537 -0. 87309 | H 3. 704763 2. 140681 -0. 89487 | H 3. 729618 2. 165205 -0. 86432 |
| H 4. 802662 1. 409819 0. 294549 | H 4. 797826 1. 41771 0. 280475  | H 4. 817123 1. 3619 0. 267051   |
| H 2. 489294 2. 989043 1. 119603 | H 2. 463473 2. 990608 1. 110063 | H 2. 461752 2. 999556 1. 067623 |
| H 1. 701127 1. 907133 2. 264229 | H 1. 748979 1. 890068 2. 30262  | H 1. 744413 1. 910007 2. 272141 |
| H 3. 475335 2. 080561 2. 266145 | H 3. 499526 2. 097873 2. 235973 | H 3. 498559 2. 128275 2. 207625 |
| H 2. 120834 0. 177918 -2. 55894 | H 2. 128678 0. 176951 -2. 55463 | H 1. 912345 -1. 26749 -2. 69117 |
| H 2. 325912 0. 044589 3. 14802  | H 1. 32003 -0. 57553 2. 349889  | H 2. 354606 -1. 2359 3. 039404  |
| H 3. 63623 -1. 56168 -1. 21057  | H 3. 638842 -1. 56776 -1. 2034  | H 3. 633085 -1. 49826 -1. 14946 |
| H -4. 43857 -2. 91679 -0. 58286 | H -4. 45171 -2. 90267 -0. 60003 | H -4. 44552 -2. 89881 -0. 59774 |
| H -3. 66912 -2. 97916 1. 031345 | H -3. 68165 -2. 98981 1. 012869 | H -3. 67049 -2. 98138 1. 012724 |
| H -5. 44951 -2. 98857 0. 887089 | H -5. 46183 -2. 98422 0. 870128 | H -5. 45125 -2. 97955 0. 87526  |

## 2α10α17 (2.57%)

C 2. 821348 -1. 72873 0. 626719  
 C 3. 029133 -0. 40243 1. 377941  
 C 2. 721045 0. 891384 0. 555836  
 C 1. 344526 0. 715282 -0. 16531  
 C 1. 203173 -0. 60287 -0. 99531  
 C 1. 449246 -1. 79626 -0. 05278  
 C 0. 873422 1. 93978 -0. 91445  
 C -0. 42961 2. 21243 -1. 1063  
 C -1. 51481 1. 300045 -0. 71113  
 C -1. 37927 -0. 09502 -0. 88098

C -0.20254 -0.6628 -1.64593  
C -2.70817 1.799486 -0.16036  
C -3.74347 0.977247 0.271326  
C -3.57324 -0.41577 0.130175  
C -2.41374 -0.93642 -0.44875  
C -5.01067 1.529554 0.872986  
C 3.908322 1.213546 -0.38061  
C 2.607748 2.07643 1.544859  
H 0.623204 0.568942 0.651439  
O 2.100084 -0.67043 -2.10935  
O 2.170826 -0.54675 2.515609  
O 3.895158 -1.87694 -0.3302  
O -4.61852 -1.17917 0.577643  
C -4.52517 -2.5883 0.460611  
H 2.904464 -2.5231 1.379534  
H 4.080946 -0.36372 1.702946  
H 0.678916 -1.8212 0.72617  
H 1.366587 -2.73158 -0.62464  
H 1.613603 2.650138 -1.27454  
H -0.71587 3.159596 -1.56361  
H -0.09894 -0.10105 -2.58143  
H -0.40461 -1.70357 -1.92592  
H -2.82205 2.876878 -0.0536  
H -2.30787 -2.00604 -0.59574  
H -5.16088 1.163815 1.895979  
H -4.98365 2.623249 0.899915  
H -5.89341 1.220491 0.300441  
H 4.153971 0.408457 -1.0693  
H 3.702376 2.109478 -0.97498  
H 4.804384 1.420232 0.218331  
H 2.532151 3.024943 1.004367  
H 1.718523 2.003153 2.181006  
H 3.498575 2.140589 2.185665  
H 2.939404 -1.03087 -1.7702  
H 2.318977 0.212957 3.097042  
H 3.888026 -2.80063 -0.6276  
H -4.44331 -2.90314 -0.58837  
H -3.66833 -2.98483 1.02161

H -5.44922 -2.9865 0.884605

**Table S9.** Conformers and Boltzmann populations of 2 $\beta$ ,10 $\alpha$ -OH isomer of **6**.

| <b>2<math>\beta</math>10<math>\alpha</math>1 (20.69%)</b> | <b>2<math>\beta</math>10<math>\alpha</math>2 (26.62%)</b> | <b>2<math>\beta</math>10<math>\alpha</math>3 (29.01%)</b> |
|-----------------------------------------------------------|-----------------------------------------------------------|-----------------------------------------------------------|
| C 3.188918 1.524535 0.644379                              | C 3.176744 1.535417 0.63175                               | C 3.185267 1.555423 0.637164                              |
| C 3.912973 0.264903 0.161706                              | C 3.903277 0.26186 0.173736                               | C 3.901848 0.278277 0.188516                              |
| C 3.039611 -1.01239 0.221838                              | C 3.030907 -1.01658 0.227927                              | C 3.024975 -1.00248 0.241223                              |
| C 1.677732 -0.73931 -0.52915                              | C 1.676556 -0.74054 -0.53487                              | C 1.67426 -0.73209 -0.52848                               |
| C 0.944596 0.55841 -0.07908                               | C 0.944976 0.559631 -0.08957                              | C 0.941114 0.570092 -0.089                                |
| C 1.906054 1.753262 -0.15194                              | C 1.900463 1.757848 -0.16744                              | C 1.901337 1.76515 -0.17117                               |
| C 0.801932 -1.97127 -0.56507                              | C 0.800005 -1.97175 -0.57857                              | C 0.801465 -1.9663 -0.57522                               |
| C -0.53274 -2.14589 -0.48828                              | C -0.53465 -2.14629 -0.50158                              | C -0.53298 -2.14331 -0.50176                              |
| C -1.65265 -1.20561 -0.34692                              | C -1.65336 -1.20574 -0.3539                               | C -1.65374 -1.20526 -0.3564                               |
| C -1.56516 0.182992 -0.57085                              | C -1.56489 0.182964 -0.57697                              | C -1.5676 0.183642 -0.58012                               |
| C -0.2761 0.839646 -1.00684                               | C -0.27647 0.837721 -1.01703                              | C -0.28003 0.841225 -1.01868                              |
| C -2.9084 -1.73963 0.013394                               | C -2.90836 -1.73886 0.010366                              | C -2.90795 -1.74138 0.00631                               |
| C -4.05213 -0.96948 0.176591                              | C -4.05027 -0.96721 0.179123                              | C -4.05147 -0.97212 0.174222                              |
| C -3.93428 0.419412 -0.03499                              | C -3.93129 0.421925 -0.03092                              | C -3.93491 0.417457 -0.03526                              |
| C -2.70673 0.976175 -0.39978                              | C -2.70458 0.977562 -0.40021                              | C -2.7091 0.97568 -0.40395                                |
| C -5.37897 -1.57021 0.56447                               | C -5.3765 -1.56646 0.571357                               | C -5.37682 -1.57383 0.565579                              |
| C 2.838655 -1.43581 1.692962                              | C 2.817822 -1.43575 1.698572                              | C 2.81165 -1.41609 1.713301                               |
| C 3.833462 -2.13369 -0.48931                              | C 3.829461 -2.1401 -0.47396                               | C 3.821471 -2.13359 -0.45269                              |
| H 1.986565 -0.54464 -1.56764                              | H 1.995082 -0.54672 -1.57068                              | H 1.995823 -0.53743 -1.564                                |
| O 0.521953 0.516075 1.289992                              | O 0.523237 0.518823 1.28044                               | O 0.518078 0.530958 1.279818                              |
| O 4.341986 0.472271 -1.18417                              | O 4.361383 0.464388 -1.16061                              | O 4.35453 0.572934 -1.1504                                |
| O 4.129435 2.594173 0.439491                              | O 4.028104 2.671642 0.377028                              | O 4.063512 2.668883 0.52443                               |
| O -5.08372 1.138075 0.138702                              | O -5.07886 1.141912 0.148729                              | O -5.08354 1.134953 0.14412                               |
| C -5.04207 2.542657 -0.05501                              | C -5.03548 2.547051 -0.04203                              | C -5.04196 2.541218 -0.04123                              |
| H 2.956721 1.435536 1.712004                              | H 2.939322 1.477824 1.699804                              | H 2.935057 1.474948 1.697659                              |
| H 4.793863 0.107683 0.806608                              | H 4.773621 0.098873 0.838504                              | H 4.779496 0.129623 0.835911                              |
| H 2.173239 1.940965 -1.19765                              | H 2.167912 1.941768 -1.21386                              | H 2.164141 1.945095 -1.2208                               |
| H 1.379728 2.638904 0.229336                              | H 1.385787 2.648175 0.208584                              | H 1.388099 2.657816 0.201729                              |
| H 1.362574 -2.89397 -0.69078                              | H 1.360102 -2.89395 -0.7112                               | H 1.362373 -2.8887 -0.70594                               |
| H -0.86159 -3.18483 -0.52452                              | H -0.86419 -3.18483 -0.54393                              | H -0.86019 -3.18259 -0.54456                              |
| H -0.02374 0.524638 -2.02836                              | H -0.02528 0.518004 -2.03742                              | H -0.02682 0.520713 -2.03847                              |
| H -0.43913 1.922666 -1.04582                              | H -0.43821 1.92053 -1.05998                               | H -0.44405 1.92345 -1.06331                               |
| H -2.98416 -2.81335 0.174834                              | H -2.98499 -2.81274 0.170493                              | H -2.98247 -2.81539 0.166594                              |
| H -2.62073 2.044299 -0.56626                              | H -2.61746 2.045726 -0.56556                              | H -2.62393 2.044032 -0.5688                               |

|                                 |                                 |                                 |
|---------------------------------|---------------------------------|---------------------------------|
| H -6. 14569 -1. 36683 -0. 19259 | H -6. 14595 -1. 36062 -0. 18228 | H -6. 14607 -1. 36975 -0. 18874 |
| H -5. 29478 -2. 65433 0. 686453 | H -5. 2936 -2. 65093 0. 691251  | H -5. 29189 -2. 65809 0. 686021 |
| H -5. 75029 -1. 14528 1. 504674 | H -5. 7434 -1. 14246 1. 513726  | H -5. 74522 -1. 15006 1. 507429 |
| H 2. 331209 -0. 67301 2. 28503  | H 2. 314616 -0. 66665 2. 286251 | H 2. 305251 -0. 64316 2. 291989 |
| H 2. 232914 -2. 34782 1. 743254 | H 2. 201957 -2. 34092 1. 747135 | H 2. 198652 -2. 323 1. 766976   |
| H 3. 807276 -1. 65852 2. 157438 | H 3. 781623 -1. 66918 2. 168444 | H 3. 775312 -1. 64098 2. 188072 |
| H 3. 37862 -3. 11681 -0. 33128  | H 3. 372274 -3. 12238 -0. 31735 | H 3. 37948 -3. 11766 -0. 27145  |
| H 3. 92034 -1. 95205 -1. 56359  | H 3. 924499 -1. 9609 -1. 54804  | H 3. 883616 -1. 99057 -1. 53738 |
| H 4. 849775 -2. 18123 -0. 08049 | H 4. 842756 -2. 18826 -0. 05733 | H 4. 843477 -2. 17524 -0. 05122 |
| H -0. 11396 -0. 21281 1. 380281 | H -0. 1232 -0. 20098 1. 368971  | H -0. 1453 -0. 17362 1. 365192  |
| H 4. 709225 1. 373943 -1. 19019 | H 4. 638253 1. 399144 -1. 1843  | H 5. 076496 -0. 03493 -1. 36468 |
| H 3. 663886 3. 43289 0. 580024  | H 4. 737626 2. 660853 1. 039593 | H 4. 474186 2. 57084 -0. 35257  |
| H -6. 05496 2. 901266 0. 137695 | H -6. 04685 2. 906977 0. 156078 | H -6. 0538 2. 898834 0. 158447  |
| H -4. 34673 3. 025789 0. 643912 | H -4. 33604 3. 027233 0. 654734 | H -4. 343 3. 019269 0. 657313   |
| H -4. 75574 2. 799924 -1. 08331 | H -4. 75337 2. 806027 -1. 07103 | H -4. 76043 2. 804327 -1. 06929 |

#### 2β10α4 (20.69%)

C 3. 188844 1. 524588 0. 644413  
 C 3. 912954 0. 264903 0. 161878  
 C 3. 039553 -1. 01238 0. 221933  
 C 1. 677754 -0. 73928 -0. 52925  
 C 0. 944601 0. 558407 -0. 07928  
 C 1. 906038 1. 75327 -0. 15203  
 C 0. 80196 -1. 97123 -0. 56527  
 C -0. 53271 -2. 14588 -0. 48836  
 C -1. 65262 -1. 2056 -0. 347  
 C -1. 56514 0. 182972 -0. 57097  
 C -0. 27609 0. 839557 -1. 00708  
 C -2. 90837 -1. 73964 0. 013367  
 C -4. 05207 -0. 96947 0. 176603  
 C -3. 93423 0. 419439 -0. 03495  
 C -2. 7067 0. 976168 -0. 39985  
 C -5. 37889 -1. 57017 0. 564613  
 C 2. 838423 -1. 43581 1. 693009  
 C 3. 833414 -2. 13371 -0. 48912  
 H 1. 986776 -0. 54464 -1. 56768  
 O 0. 521846 0. 51611 1. 289791  
 O 4. 342216 0. 472227 -1. 18391

#### 2β10α6 (1.50%)

C 3. 186204 1. 554034 0. 644  
 C 3. 910438 0. 275615 0. 1961  
 C 3. 032907 -1. 00567 0. 228523  
 C 1. 672917 -0. 73414 -0. 53076  
 C 0. 939669 0. 569919 -0. 09075  
 C 1. 902264 1. 764505 -0. 16747  
 C 0. 800017 -1. 96933 -0. 57048  
 C -0. 53469 -2. 14235 -0. 49494  
 C -1. 65523 -1. 20365 -0. 35309  
 C -1. 56995 0. 184927 -0. 57866  
 C -0. 28281 0. 843002 -1. 01834  
 C -2. 90935 -1. 73979 0. 010256  
 C -4. 05309 -0. 97079 0. 176852  
 C -3. 93719 0. 418686 -0. 03464  
 C -2. 71141 0. 977 -0. 40411  
 C -5. 37817 -1. 5724 0. 569046  
 C 2. 81181 -1. 4262 1. 698502  
 C 3. 829696 -2. 13334 -0. 4688  
 H 1. 967205 -0. 55173 -1. 58107  
 O 0. 521192 0. 527966 1. 276867  
 O 4. 506308 0. 524436 -1. 09566

#### 2β10α9 (1.51%)

C 3. 186025 1. 55408 0. 644103  
 C 3. 910376 0. 275641 0. 196414  
 C 3. 032762 -1. 00564 0. 228594  
 C 1. 672965 -0. 73406 -0. 53103  
 C 0. 939675 0. 569985 -0. 09102  
 C 1. 902232 1. 764544 -0. 16759  
 C 0. 800069 -1. 96923 -0. 57119  
 C -0. 53462 -2. 14228 -0. 49536  
 C -1. 65511 -1. 20361 -0. 35323  
 C -1. 56992 0. 184949 -0. 57881  
 C -0. 28283 0. 843021 -1. 01859  
 C -2. 9092 -1. 73981 0. 010268  
 C -4. 05294 -0. 97087 0. 177029  
 C -3. 93709 0. 418669 -0. 03446  
 C -2. 7114 0. 976999 -0. 4041  
 C -5. 37791 -1. 57239 0. 569599  
 C 2. 811333 -1. 42625 1. 698524  
 C 3. 829706 -2. 13336 -0. 46851  
 H 1. 967564 -0. 55152 -1. 58123  
 O 0. 521182 0. 527965 1. 276651  
 O 4. 506745 0. 524362 -1. 0951

|                              |                              |                              |
|------------------------------|------------------------------|------------------------------|
| O 4.129374 2.59422 0.439505  | O 4.061935 2.667411 0.525153 | O 4.061671 2.667491 0.525336 |
| O -5.08366 1.138077 0.138907 | O -5.08545 1.135503 0.14347  | O -5.08532 1.135435 0.144    |
| C -5.04213 2.542627 -0.05498 | C -5.04521 2.542174 -0.04195 | C -5.04547 2.541966 -0.04252 |
| H 2.956582 1.435665 1.712023 | H 2.925352 1.477229 1.702743 | H 2.925035 1.477285 1.702827 |
| H 4.793727 0.107686 0.806947 | H 4.777179 0.120558 0.847879 | H 4.776839 0.120574 0.848562 |
| H 2.173323 1.941039 -1.19771 | H 2.158788 1.959235 -1.21924 | H 2.159006 1.959303 -1.21928 |
| H 1.379648 2.638902 0.229179 | H 1.389948 2.659322 0.200347 | H 1.389899 2.659401 0.200132 |
| H 1.362606 -2.89391 -0.69113 | H 1.362052 -2.89123 -0.69492 | H 1.362064 -2.89108 -0.69614 |
| H -0.86153 -3.18482 -0.52466 | H -0.86215 -3.18172 -0.53024 | H -0.86208 -3.18164 -0.53095 |
| H -0.02378 0.524381 -2.02856 | H -0.03347 0.524556 -2.04002 | H -0.03354 0.524405 -2.04024 |
| H -0.4391 1.922574 -1.04626  | H -0.44647 1.925362 -1.06038 | H -0.44648 1.925372 -1.0608  |
| H -2.98416 -2.81335 0.174766 | H -2.98341 -2.81345 0.172452 | H -2.98316 -2.8135 0.17234   |
| H -2.62067 2.044282 -0.56638 | H -2.62699 2.04515 -0.57052  | H -2.62702 2.045163 -0.57046 |
| H -6.14611 -1.3653 -0.19152  | H -6.14699 -1.37049 -0.18622 | H -6.14786 -1.36708 -0.18355 |
| H -5.2951 -2.65452 0.684917  | H -5.29265 -2.65625 0.692174 | H -5.29337 -2.65673 0.689062 |
| H -5.74927 -1.14657 1.505803 | H -5.74704 -1.14636 1.509611 | H -5.74459 -1.14912 1.512312 |
| H 2.331059 -0.67295 2.285076 | H 2.31765 -0.65121 2.28506   | H 2.317074 -0.65125 2.284995 |
| H 2.232597 -2.34776 1.743233 | H 2.187085 -2.32526 1.746035 | H 2.18658 -2.32529 1.745884  |
| H 3.806986 -1.65862 2.15757  | H 3.773658 -1.66752 2.167428 | H 3.773087 -1.66758 2.167608 |
| H 3.37854 -3.11682 -0.3311   | H 3.377224 -3.11524 -0.29916 | H 3.377274 -3.11525 -0.29872 |
| H 3.920345 -1.95211 -1.56341 | H 3.91801 -1.9769 -1.54845   | H 3.918015 -1.97713 -1.5482  |
| H 4.849706 -2.18127 -0.08025 | H 4.847055 -2.17175 -0.06331 | H 4.847055 -2.17162 -0.06301 |
| H -0.11352 -0.21323 1.380178 | H -0.14229 -0.17639 1.364026 | H -0.14277 -0.17597 1.363592 |
| H 4.709552 1.373865 -1.18992 | H 3.79921 0.524536 -1.76041  | H 3.800026 0.523931 -1.76024 |
| H 3.663845 3.432942 0.580112 | H 4.564603 2.49955 -0.2927   | H 4.564652 2.499479 -0.29228 |
| H -6.05502 2.901195 0.13779  | H -6.0573 2.898553 0.158208  | H -6.05767 2.898259 0.157197 |
| H -4.34679 3.025908 0.643834 | H -4.3465 3.020531 0.656503  | H -4.34702 3.021081 0.655673 |
| H -4.75598 2.799802 -1.08335 | H -4.76461 2.805187 -1.07022 | H -4.76477 2.804244 -1.07095 |

**Table S10.** Conformers and Boltzmann populations of 2 $\alpha$ ,10 $\beta$ -OH isomer of **6**.

| <b>2<math>\alpha</math>10<math>\beta</math>1 (28.98%)</b> | <b>2<math>\alpha</math>10<math>\beta</math>2 (23.10%)</b> | <b>2<math>\alpha</math>10<math>\beta</math>3 (15.17%)</b> |
|-----------------------------------------------------------|-----------------------------------------------------------|-----------------------------------------------------------|
| C 3.479124 -1.19501 -0.28603                              | C 3.482507 -1.22152 -0.29927                              | C 3.486109 -1.20517 -0.3245                               |
| C 3.655695 0.300564 -0.0243                               | C 3.650964 0.274401 -0.03216                              | C 3.653679 0.287416 -0.01751                              |
| C 2.512832 0.898151 0.827743                              | C 2.514883 0.879696 0.830686                              | C 2.505862 0.887017 0.834274                              |
| C 1.137269 0.585178 0.128397                              | C 1.137456 0.577145 0.132019                              | C 1.135005 0.573259 0.124874                              |
| C 0.946928 -0.92152 -0.27918                              | C 0.944501 -0.93113 -0.27241                              | C 0.952424 -0.93333 -0.28314                              |
| C 2.172088 -1.46425 -1.02855                              | C 2.16479 -1.48423 -1.01936                               | C 2.170315 -1.46506 -1.04836                              |
| C 0.80218 1.528888 -1.01496                               | C 0.808419 1.523484 -1.01055                              | C 0.810634 1.513913 -1.02308                              |

|                              |                              |                              |
|------------------------------|------------------------------|------------------------------|
| C -0.45754 1.780027 -1.41437 | C -0.45027 1.779631 -1.41025 | C -0.44799 1.765833 -1.4253  |
| C -1.62725 1.049693 -0.90085 | C -1.62223 1.052117 -0.89814 | C -1.61979 1.042523 -0.90592 |
| C -1.55262 -0.34528 -0.70425 | C -1.55166 -0.34357 -0.70317 | C -1.5501 -0.35184 -0.70087  |
| C -0.32286 -1.10355 -1.15415 | C -0.32377 -1.10599 -1.15141 | C -0.3243 -1.11866 -1.1479   |
| C -2.83585 1.707159 -0.61302 | C -2.82912 1.713241 -0.61135 | C -2.82564 1.706479 -0.62157 |
| C -3.94482 1.049266 -0.09108 | C -3.94065 1.05843 -0.09113  | C -3.93703 1.056161 -0.09527 |
| C -3.83676 -0.33923 0.138022 | C -3.83703 -0.33067 0.136816 | C -3.83451 -0.33149 0.141585 |
| C -2.65981 -1.02415 -0.17627 | C -2.66181 -1.01902 -0.17708 | C -2.66017 -1.0229 -0.16898  |
| C -5.22911 1.771144 0.228448 | C -5.22329 1.783763 0.227153 | C -5.21855 1.784809 0.219833 |
| C 2.732752 2.422377 0.958592 | C 2.73604 2.404233 0.967992  | C 2.719269 2.410311 0.976531 |
| C 2.540165 0.3293 2.266511   | C 2.544031 0.304476 2.266025 | C 2.510053 0.309817 2.271529 |
| H 0.36143 0.762931 0.889264  | H 0.362539 0.758853 0.892826 | H 0.352456 0.752065 0.878323 |
| O 0.814009 -1.74828 0.888993 | O 0.796688 -1.74712 0.90069  | O 0.830712 -1.75462 0.890416 |
| O 4.904454 0.543379 0.608949 | O 4.950663 0.416332 0.564033 | O 4.960774 0.511667 0.536702 |
| O 4.623145 -1.57642 -1.07201 | O 4.537177 -1.68519 -1.13617 | O 4.549942 -1.64164 -1.16282 |
| O -4.9538 -0.93192 0.659276  | O -4.95606 -0.92023 0.656181 | O -4.95357 -0.91669 0.66587  |
| C -4.9291 -2.32855 0.903704  | C -4.93669 -2.31782 0.897887 | C -4.93691 -2.31331 0.912673 |
| H 3.497121 -1.73282 0.669374 | H 3.501039 -1.75912 0.659124 | H 3.501327 -1.77066 0.6217   |
| H 3.645524 0.79626 -1.01311  | H 3.65577 0.77384 -1.01554   | H 3.6907 0.811863 -0.98093   |
| H 2.235484 -0.98566 -2.01324 | H 2.223613 -1.01613 -2.00979 | H 2.222923 -0.9733 -2.02745  |
| H 2.038157 -2.54119 -1.1942  | H 2.037924 -2.56119 -1.17462 | H 2.049702 -2.53906 -1.22823 |
| H 1.612638 2.075801 -1.48816 | H 1.620621 2.065438 -1.48746 | H 1.624312 2.050825 -1.5028  |
| H -0.63668 2.559045 -2.15542 | H -0.62621 2.55848 -2.15227  | H -0.62425 2.53802 -2.17404  |
| H -0.08294 -0.78699 -2.17546 | H -0.07979 -0.78948 -2.17156 | H -0.08859 -0.81385 -2.17354 |
| H -0.53194 -2.17859 -1.18515 | H -0.53648 -2.18006 -1.18492 | H -0.536 -2.19331 -1.16846   |
| H -2.90312 2.778958 -0.79019 | H -2.89324 2.785313 -0.78831 | H -2.88904 2.777348 -0.80571 |
| H -2.59715 -2.09916 -0.04372 | H -2.60314 -2.09451 -0.04678 | H -2.60287 -2.09772 -0.03235 |
| H -5.14861 2.834592 -0.01616 | H -5.1395 2.847179 -0.01662  | H -5.134 2.846534 -0.0308    |
| H -6.07337 1.350987 -0.33101 | H -6.06789 1.3664 -0.33385   | H -6.06415 1.364674 -0.33757 |
| H -5.48505 1.680543 1.290923 | H -5.4811 1.693058 1.289166  | H -5.47526 1.701114 1.28269  |
| H 1.876686 2.895896 1.454038 | H 1.87089 2.882451 1.441193  | H 1.876435 2.872664 1.503875 |
| H 3.626927 2.613317 1.558646 | H 3.604645 2.603574 1.607267 | H 3.631225 2.606009 1.548863 |
| H 2.878981 2.917187 -0.00644 | H 2.90523 2.905062 0.008405  | H 2.83053 2.916305 0.013312  |
| H 3.524613 0.50011 2.710691  | H 3.538043 0.445047 2.701493 | H 3.44729 0.555303 2.788364  |
| H 1.795093 0.848706 2.882729 | H 1.820235 0.838953 2.894574 | H 1.708305 0.775469 2.857446 |
| H 2.315792 -0.73698 2.302838 | H 2.293552 -0.75547 2.295655 | H 2.355156 -0.7688 2.298472  |
| H 0.047758 -1.41593 1.386361 | H 0.006776 -1.42881 1.369811 | H 0.032644 -1.4588 1.360523  |
| H 5.538544 -0.01574 0.127419 | H 5.223649 1.341653 0.479325 | H 4.97484 0.10203 1.417479   |



|                              |                              |                              |
|------------------------------|------------------------------|------------------------------|
| H 4.690481 -2.54289 -1.05329 | H 5.348445 -1.32995 -0.73412 | H 5.341823 -1.19237 -0.81774 |
| H -5.90673 -2.57688 1.321133 | H -5.91569 -2.56314 1.313809 | H -5.91628 -2.55524 1.329679 |
| H -4.77484 -2.89838 -0.02212 | H -4.78362 -2.88607 -0.02897 | H -4.78509 -2.88529 -0.01211 |
| H -4.14718 -2.59847 1.625934 | H -4.15653 -2.59181 1.620365 | H -4.15721 -2.5863 1.636108  |

#### 2 $\alpha$ 10 $\beta$ 4 (17.23%)

C 3.478164 -1.20117 -0.28657  
 C 3.654699 0.297045 -0.01901  
 C 2.513273 0.897201 0.833645  
 C 1.138685 0.585179 0.131322  
 C 0.947661 -0.92206 -0.27663  
 C 2.171625 -1.47208 -1.02585  
 C 0.803812 1.530903 -1.01054  
 C -0.45585 1.781699 -1.4109  
 C -1.62584 1.050395 -0.89995  
 C -1.55138 -0.34453 -0.70311  
 C -0.32179 -1.10314 -1.15255  
 C -2.8349 1.7079 -0.61371  
 C -3.94422 1.050009 -0.09276  
 C -3.83626 -0.33857 0.136869  
 C -2.65897 -1.02349 -0.17627  
 C -5.22892 1.771691 0.225367  
 C 2.734137 2.420674 0.968891  
 C 2.541722 0.322813 2.269952  
 H 0.361731 0.761543 0.891266  
 O 0.814967 -1.74725 0.890683  
 O 4.907945 0.535684 0.60294  
 O 4.624294 -1.69368 -1.00188  
 O -4.95338 -0.93097 0.657133  
 C -4.92904 -2.32774 0.902457  
 H 3.499987 -1.74707 0.659383  
 H 3.637096 0.801121 -1.00821  
 H 2.217847 -0.99046 -2.01379  
 H 2.046579 -2.54826 -1.18858  
 H 1.613417 2.082764 -1.47974  
 H -0.63477 2.563419 -2.14919  
 H -0.08214 -0.78601 -2.17389  
 H -0.53077 -2.17806 -1.18414

#### 2 $\alpha$ 10 $\beta$ 5 (3.84%)

C 3.489638 -1.19881 -0.33347  
 C 3.650434 0.291948 -0.03478  
 C 2.515537 0.872332 0.847454  
 C 1.132734 0.561319 0.15918  
 C 0.952092 -0.93198 -0.269  
 C 2.170892 -1.4463 -1.05659  
 C 0.801967 1.512215 -0.98133  
 C -0.45304 1.76999 -1.38948  
 C -1.63025 1.044771 -0.88903  
 C -1.5601 -0.34745 -0.67995  
 C -0.33223 -1.11309 -1.12285  
 C -2.84015 1.70901 -0.62264  
 C -3.95696 1.058231 -0.11009  
 C -3.85263 -0.32808 0.133415  
 C -2.6743 -1.01786 -0.16119  
 C -5.2438 1.784807 0.187772  
 C 2.718479 2.399287 0.994695  
 C 2.569474 0.290778 2.27926  
 H 0.360172 0.714047 0.924965  
 O 0.797676 -1.67709 0.952649  
 O 4.954632 0.425674 0.552712  
 O 4.546298 -1.64604 -1.17547  
 O -4.97676 -0.91401 0.648265  
 C -4.94835 -2.30344 0.92891  
 H 3.507462 -1.75286 0.616292  
 H 3.646292 0.811484 -1.00775  
 H 2.218752 -0.94596 -2.03186  
 H 2.060615 -2.52 -1.26501  
 H 1.615422 2.058574 -1.45079  
 H -0.62104 2.552412 -2.12984  
 H -0.09945 -0.81742 -2.15245  
 H -0.55646 -2.18794 -1.15082

#### 2 $\alpha$ 10 $\beta$ 7 (2.90%)

C 3.492783 -1.18047 -0.36069  
 C 3.652493 0.306179 -0.0198  
 C 2.505462 0.878476 0.852092  
 C 1.129963 0.556275 0.152468  
 C 0.960517 -0.93495 -0.28106  
 C 2.176274 -1.42493 -1.08824  
 C 0.804672 1.50195 -0.99328  
 C -0.4501 1.756158 -1.404  
 C -1.62736 1.035239 -0.89654  
 C -1.55833 -0.35563 -0.67762  
 C -0.33268 -1.12588 -1.11958  
 C -2.83622 1.702291 -0.63269  
 C -3.95305 1.056025 -0.11434  
 C -3.85 -0.32875 0.138053  
 C -2.67255 -1.0216 -0.15311  
 C -5.23878 1.78593 0.180127  
 C 2.698718 2.403814 1.008126  
 C 2.535412 0.291013 2.284698  
 H 0.3494 0.70629 0.910419  
 O 0.835475 -1.68905 0.939266  
 O 4.962264 0.523017 0.530323  
 O 4.559896 -1.598 -1.20292  
 O -4.97427 -0.91025 0.657542  
 C -4.94812 -2.29836 0.944538  
 H 3.506733 -1.76377 0.575215  
 H 3.68118 0.851411 -0.97188  
 H 2.216781 -0.90017 -2.0508  
 H 2.072121 -2.49416 -1.32173  
 H 1.620003 2.042903 -1.46538  
 H -0.61802 2.532254 -2.15084  
 H -0.1087 -0.84202 -2.15443  
 H -0.55665 -2.20112 -1.13462

|                                 |                                 |                                 |
|---------------------------------|---------------------------------|---------------------------------|
| H -2. 90208 2. 779668 -0. 79104 | H -2. 90153 2. 779635 -0. 8093  | H -2. 89676 2. 771665 -0. 82643 |
| H -2. 5963 -2. 09844 -0. 0435   | H -2. 61174 -2. 0892 -0. 00463  | H -2. 61132 -2. 09213 0. 009727 |
| H -5. 14837 2. 835177 -0. 01902 | H -5. 15854 2. 846069 -0. 06511 | H -5. 15277 2. 845318 -0. 08013 |
| H -6. 07243 1. 351373 -0. 33507 | H -6. 08251 1. 36159 -0. 37783  | H -6. 07853 1. 359621 -0. 38156 |
| H -5. 48596 1. 680836 1. 287529 | H -5. 51226 1. 704009 1. 247963 | H -5. 50602 1. 712677 1. 241174 |
| H 1. 879945 2. 893167 1. 468557 | H 1. 850581 2. 861182 1. 478533 | H 1. 856054 2. 846582 1. 551888 |
| H 3. 629966 2. 608921 1. 567542 | H 3. 588491 2. 604759 1. 630399 | H 3. 614702 2. 606172 1. 571786 |
| H 2. 87776 2. 919281 0. 00529   | H 2. 874668 2. 911498 0. 039055 | H 2. 79018 2. 923625 0. 050311  |
| H 3. 525503 0. 495464 2. 714753 | H 3. 566244 0. 445343 2. 703973 | H 3. 470073 0. 558627 2. 795996 |
| H 1. 794635 0. 837137 2. 887872 | H 1. 842521 0. 809379 2. 915992 | H 1. 723949 0. 727906 2. 877554 |
| H 2. 321514 -0. 7444 2. 3022    | H 2. 33005 -0. 77084 2. 309591  | H 2. 404457 -0. 79017 2. 308066 |
| H 0. 049564 -1. 41455 1. 389058 | H 0. 768826 -2. 61737 0. 712083 | H 0. 787332 -2. 6267 0. 691542  |
| H 5. 513492 -0. 11095 0. 197925 | H 5. 212394 1. 358248 0. 508944 | H 4. 972502 0. 124838 1. 416339 |
| H 4. 582579 -1. 32781 -1. 9019  | H 5. 354051 -1. 27848 -0. 77685 | H 5. 347165 -1. 14579 -0. 85037 |
| H -5. 90715 -2. 57553 1. 318983 | H -5. 92885 -2. 54537 1. 343663 | H -5. 9287 -2. 53663 1. 361193  |
| H -4. 77396 -2. 89792 -0. 02294 | H -4. 784 -2. 8966 0. 019375    | H -4. 78558 -2. 896 0. 037614   |
| H -4. 14794 -2. 5971 1. 625684  | H -4. 17153 -2. 5506 1. 664451  | H -4. 1712 -2. 54364 1. 680662  |

### 2 $\alpha$ 10 $\beta$ 8 (2.59%)

C 3. 490859 -1. 17363 -0. 32114  
 C 3. 655656 0. 318178 -0. 02857  
 C 2. 515542 0. 887521 0. 846832  
 C 1. 134545 0. 56799 0. 159072  
 C 0. 953472 -0. 92573 -0. 26655  
 C 2. 177004 -1. 43617 -1. 05448  
 C 0. 800033 1. 513765 -0. 9849  
 C -0. 45559 1. 767201 -1. 39374  
 C -1. 63185 1. 041514 -0. 89093  
 C -1. 56027 -0. 34984 -0. 67852  
 C -0. 32986 -1. 11255 -1. 1194  
 C -2. 84299 1. 703867 -0. 62588  
 C -3. 95918 1. 052087 -0. 11295  
 C -3. 85344 -0. 33365 0. 132353  
 C -2. 67375 -1. 02193 -0. 16014  
 C -5. 24697 1. 777569 0. 183549  
 C 2. 715325 2. 41373 0. 993044  
 C 2. 570989 0. 30582 2. 279281  
 H 0. 361718 0. 72033 0. 92429

### 2 $\alpha$ 10 $\beta$ 11 (3.85%)

C 3. 489769 -1. 19851 -0. 33389  
 C 3. 65047 0. 292224 -0. 03453  
 C 2. 515291 0. 872281 0. 847647  
 C 1. 132656 0. 561241 0. 159166  
 C 0. 952148 -0. 93206 -0. 26911  
 C 2. 170971 -1. 44606 -1. 05685  
 C 0. 801988 1. 512158 -0. 98137  
 C -0. 45304 1. 770017 -1. 38945  
 C -1. 63024 1. 04481 -0. 88905  
 C -1. 56003 -0. 34746 -0. 68007  
 C -0. 33222 -1. 11308 -1. 12302  
 C -2. 84018 1. 708975 -0. 62271  
 C -3. 95702 1. 058184 -0. 11022  
 C -3. 85262 -0. 32814 0. 133239  
 C -2. 67427 -1. 01787 -0. 1614  
 C -5. 24388 1. 784675 0. 187592  
 C 2. 718004 2. 3992 0. 995281  
 C 2. 569193 0. 290437 2. 279299  
 H 0. 359934 0. 713868 0. 924809

### 2 $\alpha$ 10 $\beta$ 14 (2.34%)

C 3. 487442 -1. 17882 -0. 32186  
 C 3. 656332 0. 314128 -0. 02128  
 C 2. 515451 0. 888182 0. 851355  
 C 1. 13521 0. 569063 0. 160118  
 C 0. 954573 -0. 92439 -0. 26866  
 C 2. 177262 -1. 43597 -1. 05934  
 C 0. 799687 1. 517677 -0. 98128  
 C -0. 45616 1. 770219 -1. 39057  
 C -1. 63202 1. 042482 -0. 89045  
 C -1. 55957 -0. 34892 -0. 67868  
 C -0. 32953 -1. 1113 -1. 12077  
 C -2. 84376 1. 704025 -0. 62569  
 C -3. 95941 1. 051352 -0. 11299  
 C -3. 8526 -0. 33446 0. 132354  
 C -2. 67247 -1. 02193 -0. 16047  
 C -5. 24778 1. 775689 0. 183593  
 C 2. 717439 2. 413764 0. 999277  
 C 2. 569418 0. 304326 2. 282818  
 H 0. 361498 0. 718509 0. 925008

|                              |                              |                              |
|------------------------------|------------------------------|------------------------------|
| O 0.808414 -1.67393 0.954444 | O 0.797788 -1.6773 0.952389  | O 0.813862 -1.67426 0.949625 |
| O 4.90925 0.557903 0.595847  | O 4.954422 0.425428 0.553638 | O 4.912369 0.545778 0.597524 |
| O 4.629887 -1.52917 -1.12594 | O 4.546215 -1.64513 -1.17634 | O 4.631141 -1.65479 -1.05154 |
| O -4.97759 -0.9207 0.646768  | O -4.97671 -0.91421 0.647955 | O -4.97593 -0.92215 0.646752 |
| C -4.94713 -2.30909 0.930317 | C -4.94764 -2.30336 0.929781 | C -4.94406 -2.31035 0.932525 |
| H 3.522703 -1.72891 0.624363 | H 3.507925 -1.75278 0.615748 | H 3.514821 -1.74229 0.613976 |
| H 3.631718 0.832851 -1.00727 | H 3.646844 0.812154 -1.00725 | H 3.630468 0.838507 -0.99963 |
| H 2.225017 -0.93485 -2.02906 | H 2.218646 -0.94552 -2.03203 | H 2.210534 -0.92301 -2.03217 |
| H 2.059891 -2.51176 -1.261   | H 2.060939 -2.51974 -1.26544 | H 2.069625 -2.50868 -1.27321 |
| H 1.612407 2.063309 -1.45159 | H 1.615466 2.058405 -1.45092 | H 1.610648 2.073161 -1.44366 |
| H -0.62586 2.548243 -2.13497 | H -0.62106 2.552492 -2.12975 | H -0.62694 2.554477 -2.12833 |
| H -0.09726 -0.81679 -2.14901 | H -0.09939 -0.81733 -2.15259 | H -0.09886 -0.81508 -2.15087 |
| H -0.5522 -2.18865 -1.14899  | H -0.55651 -2.18791 -1.15108 | H -0.55097 -2.18723 -1.14952 |
| H -2.90571 2.774126 -0.81379 | H -2.90153 2.779617 -0.8093  | H -2.90719 2.774306 -0.81321 |
| H -2.61053 -2.09323 -0.00263 | H -2.6118 -2.08924 -0.00496  | H -2.60824 -2.09313 -0.00308 |
| H -5.16257 2.838643 -0.07021 | H -5.15873 2.84594 -0.06529  | H -5.16451 2.836801 -0.07036 |
| H -6.08499 1.352947 -0.38204 | H -6.08256 1.361387 -0.37801 | H -6.08545 1.350067 -0.38173 |
| H -5.51569 1.697514 1.243715 | H -5.51237 1.703875 1.247786 | H -5.51615 1.69548 1.243821  |
| H 1.858846 2.867083 1.50593  | H 1.850154 2.860763 1.479553 | H 1.862208 2.868147 1.513331 |
| H 3.614038 2.609987 1.584557 | H 3.58813 2.604613 1.630869  | H 3.616605 2.607591 1.591162 |
| H 2.84159 2.924142 0.033346  | H 2.873868 2.911715 0.039786 | H 2.844074 2.925793 0.040362 |
| H 3.556668 0.494998 2.713436 | H 3.565882 0.445058 2.704181 | H 3.554022 0.494695 2.718666 |
| H 1.819382 0.800775 2.906065 | H 1.842039 0.808676 2.916099 | H 1.81572 0.796906 2.90885   |
| H 2.364771 -0.76347 2.311362 | H 2.329999 -0.77125 2.309417 | H 2.365256 -0.76532 2.312724 |
| H 0.66819 -2.60201 0.706     | H 0.768949 -2.61755 0.711699 | H 0.714332 -2.60826 0.703318 |
| H 5.545624 0.025771 0.087797 | H 5.212872 1.357783 0.509243 | H 5.521153 -0.08445 0.172515 |
| H 4.717265 -2.49404 -1.11701 | H 5.354196 -1.27905 -0.77686 | H 4.592076 -1.25966 -1.93923 |
| H -5.92764 -2.55209 1.344458 | H -5.92782 -2.5453 1.345287  | H -5.92407 -2.55334 1.347783 |
| H -4.78071 -2.90418 0.022286 | H -4.7836 -2.89728 0.020678  | H -4.77796 -2.90655 0.025231 |
| H -4.1708 -2.55354 1.667424  | H -4.17031 -2.54962 1.665097 | H -4.16695 -2.55277 1.669361 |

**Table S11.** Conformers and Boltzmann populations of 2 $\beta$ ,10 $\beta$ -OH isomer of **6**.

| <b>2<math>\beta</math>10<math>\beta</math>1 (55.19%)</b> | <b>2<math>\beta</math>10<math>\beta</math>2 (4.00%)</b> | <b>2<math>\beta</math>10<math>\beta</math>3 (5.94%)</b> |
|----------------------------------------------------------|---------------------------------------------------------|---------------------------------------------------------|
| C 3.538389 -1.05381 -0.78035                             | C 3.532959 -1.028 -0.81102                              | C 3.035186 1.621854 0.364075                            |
| C 3.737156 0.342326 -0.15577                             | C 3.704526 0.360306 -0.18065                            | C 3.806451 0.295728 0.409955                            |
| C 2.566948 0.853018 0.745243                             | C 2.555945 0.829494 0.762901                            | C 2.885599 -0.93833 0.564121                            |
| C 1.178772 0.611296 0.039975                             | C 1.166614 0.582172 0.06374                             | C 1.727746 -0.88085 -0.51931                            |

|                                 |                                 |                                 |
|---------------------------------|---------------------------------|---------------------------------|
| C 1. 004042 -0. 81758 -0. 5714  | C 1. 001032 -0. 85646 -0. 5468  | C 0. 98992 0. 479233 -0. 68674  |
| C 2. 184597 -1. 18366 -1. 47901 | C 2. 175457 -1. 17411 -1. 49124 | C 2. 022903 1. 615891 -0. 77585 |
| C 0. 790714 1. 682342 -0. 96645 | C 0. 788056 1. 66181 -0. 93618  | C 0. 817656 -2. 07887 -0. 41665 |
| C -0. 48797 1. 961467 -1. 27709 | C -0. 4865 1. 948579 -1. 25837  | C -0. 51225 -2. 20533 -0. 23216 |
| C -1. 62679 1. 163418 -0. 79551 | C -1. 63245 1. 154948 -0. 79192 | C -1. 59716 -1. 2295 -0. 06191  |
| C -1. 53425 -0. 24389 -0. 75973 | C -1. 53872 -0. 25144 -0. 73882 | C -1. 42598 0. 145731 0. 199189 |
| C -0. 32783 -0. 93478 -1. 35933 | C -0. 33527 -0. 9551 -1. 32924  | C -0. 0653 0. 768353 0. 419502  |
| C -2. 824 1. 771002 -0. 37893   | C -2. 83527 1. 768987 -0. 4004  | C -2. 91734 -1. 71894 -0. 17766 |
| C -3. 9029 1. 04635 0. 116541   | C -3. 92004 1. 050513 0. 089635 | C -4. 04787 -0. 9221 -0. 06641  |
| C -3. 77606 -0. 35801 0. 181903 | C -3. 7897 -0. 35233 0. 178463  | C -3. 84931 0. 453009 0. 173384 |
| C -2. 61107 -0. 99008 -0. 26151 | C -2. 62075 -0. 98928 -0. 24345 | C -2. 55785 0. 966441 0. 300562 |
| C -5. 17487 1. 713188 0. 574583 | C -5. 1986 1. 721467 0. 523013  | C -5. 44235 -1. 47853 -0. 19829 |
| C 2. 797284 2. 359005 1. 01042  | C 2. 755479 2. 33883 1. 055829  | C 2. 38195 -1. 00971 2. 023407  |
| C 2. 585478 0. 187639 2. 143545 | C 2. 592973 0. 134201 2. 146361 | C 3. 747066 -2. 2004 0. 322051  |
| H 0. 416587 0. 672057 0. 8332   | H 0. 411968 0. 618119 0. 860401 | H 2. 259596 -0. 99093 -1. 47548 |
| O 1. 002349 -1. 8216 0. 473271  | O 0. 922638 -1. 843 0. 486743   | O 0. 357741 0. 517554 -1. 97244 |
| O 4. 981493 0. 357163 0. 53155  | O 4. 982619 0. 298375 0. 466873 | O 4. 570315 0. 168256 -0. 78473 |
| O 3. 762043 -2. 07741 0. 19535  | O 3. 669412 -2. 06294 0. 17401  | O 4. 040312 2. 62953 0. 16274   |
| O -4. 86354 -1. 01759 0. 683169 | O -4. 88155 -1. 0069 0. 680416  | O -4. 9884 1. 201853 0. 268791  |
| C -4. 82245 -2. 43316 0. 762209 | C -4. 82285 -2. 41798 0. 80986  | C -4. 8672 2. 596122 0. 500047  |
| H 4. 339163 -1. 18693 -1. 51774 | H 4. 334882 -1. 14745 -1. 55542 | H 2. 539424 1. 796923 1. 329776 |
| H 3. 842683 1. 052624 -0. 98869 | H 3. 757935 1. 074884 -1. 01912 | H 4. 485865 0. 326126 1. 279027 |
| H 2. 058828 -2. 20662 -1. 85405 | H 2. 071769 -2. 19417 -1. 88062 | H 2. 568389 1. 491911 -1. 71637 |
| H 2. 170418 -0. 51249 -2. 34647 | H 2. 147975 -0. 49187 -2. 34984 | H 1. 490047 2. 575418 -0. 82925 |
| H 1. 576118 2. 288466 -1. 40866 | H 1. 576914 2. 26768 -1. 37541  | H 1. 341809 -3. 02296 -0. 55248 |
| H -0. 70741 2. 818076 -1. 91427 | H -0. 69417 2. 809407 -1. 89443 | H -0. 8797 -3. 2316 -0. 25443   |
| H -0. 52653 -2. 0046 -1. 48501  | H -0. 54579 -2. 02317 -1. 44155 | H -0. 19926 1. 85394 0. 489346  |
| H -0. 16351 -0. 51682 -2. 35912 | H -0. 17099 -0. 54582 -2. 33305 | H 0. 31872 0. 440337 1. 390508  |
| H -2. 90578 2. 855054 -0. 43093 | H -2. 91581 2. 852622 -0. 4669  | H -3. 05569 -2. 78119 -0. 36995 |
| H -2. 53645 -2. 07242 -0. 25408 | H -2. 53555 -2. 06939 -0. 20305 | H -2. 40968 2. 023638 0. 491199 |
| H -5. 11228 2. 798259 0. 44871  | H -5. 13637 2. 804983 0. 382135 | H -5. 41567 -2. 55715 -0. 38029 |
| H -6. 04182 1. 349396 0. 010427 | H -6. 05909 1. 348641 -0. 04544 | H -6. 03218 -1. 2961 0. 707897  |
| H -5. 38003 1. 500114 1. 630512 | H -5. 41594 1. 5237 1. 579618   | H -5. 98555 -1. 00299 -1. 02365 |
| H 1. 976384 2. 785869 1. 599296 | H 1. 883881 2. 746349 1. 579282 | H 1. 612688 -1. 78112 2. 129922 |
| H 3. 727609 2. 487191 1. 572032 | H 3. 620582 2. 499077 1. 714539 | H 3. 213106 -1. 27011 2. 689276 |
| H 2. 890732 2. 946341 0. 091967 | H 2. 91251 2. 938659 0. 1541    | H 1. 963544 -0. 06887 2. 392813 |
| H 3. 552574 0. 365264 2. 622434 | H 3. 587776 0. 221327 2. 596487 | H 4. 654058 -2. 15569 0. 936177 |
| H 1. 814246 0. 642122 2. 778374 | H 1. 881766 0. 630202 2. 81706  | H 3. 206887 -3. 11015 0. 603267 |

|                                 |                                 |                                 |
|---------------------------------|---------------------------------|---------------------------------|
| H 2. 409713 -0. 88662 2. 12186  | H 2. 320064 -0. 91654 2. 108995 | H 4. 060524 -2. 28143 -0. 72169 |
| H 0. 32528 -1. 57141 1. 123816  | H 1. 828103 -2. 17748 0. 629992 | H -0. 35724 -0. 1398 -1. 96813  |
| H 5. 041682 -0. 52695 0. 939208 | H 5. 118021 1. 120732 0. 96138  | H 4. 962681 1. 048655 -0. 92337 |
| H 2. 897111 -2. 25238 0. 610074 | H 4. 399983 -1. 77867 0. 751757 | H 3. 598975 3. 435554 -0. 14667 |
| H -5. 77938 -2. 7368 1. 190699  | H -4. 0071 -2. 7285 1. 475633   | H -5. 88717 2. 983842 0. 53124  |
| H -4. 00802 -2. 77774 1. 413183 | H -4. 69691 -2. 90845 -0. 16454 | H -4. 37059 2. 804901 1. 456837 |
| H -4. 70783 -2. 89003 -0. 22955 | H -5. 77873 -2. 71875 1. 24337  | H -4. 31454 3. 092439 -0. 3084  |

### 2β10β6 (9.56%)

C 3. 030227 1. 645602 0. 357773  
 C 3. 794362 0. 316652 0. 417439  
 C 2. 878313 -0. 92768 0. 564714  
 C 1. 724943 -0. 87576 -0. 52165  
 C 0. 988748 0. 485215 -0. 69919  
 C 2. 017847 1. 624734 -0. 78914  
 C 0. 817499 -2. 07617 -0. 41579  
 C -0. 51172 -2. 20264 -0. 22691  
 C -1. 59732 -1. 22774 -0. 05806  
 C -1. 42785 0. 150106 0. 19183  
 C -0. 06907 0. 780197 0. 402674  
 C -2. 91665 -1. 72159 -0. 16501  
 C -4. 04868 -0. 9267 -0. 05606  
 C -3. 85234 0. 450864 0. 171732  
 C -2. 56159 0. 968408 0. 290339  
 C -5. 44235 -1. 48725 -0. 17874  
 C 2. 375166 -1. 00033 2. 024062  
 C 3. 742256 -2. 18897 0. 3257  
 H 2. 258357 -0. 98727 -1. 47747  
 O 0. 358514 0. 504905 -1. 98651  
 O 4. 569332 0. 293897 -0. 7956  
 O 3. 945775 2. 725434 0. 22707  
 O -4. 9923 1. 197801 0. 264493  
 C -4. 87332 2. 594724 0. 484156  
 H 2. 522793 1. 810502 1. 314328  
 H 4. 47944 0. 351757 1. 278689  
 H 2. 561431 1. 50375 -1. 73258  
 H 1. 497274 2. 586811 -0. 83901  
 H 1. 340265 -3. 0215 -0. 55233

### 2β10β8 (4.84%)

C 3. 529193 -1. 01608 -0. 81632  
 C 3. 70141 0. 368457 -0. 1672  
 C 2. 553092 0. 831264 0. 769541  
 C 1. 165811 0. 579803 0. 066907  
 C 0. 999657 -0. 85678 -0. 54788  
 C 2. 172306 -1. 16698 -1. 49726  
 C 0. 787258 1. 659209 -0. 93327  
 C -0. 48659 1. 9465 -1. 25755  
 C -1. 63371 1. 153795 -0. 79214  
 C -1. 54097 -0. 2525 -0. 73858  
 C -0. 33766 -0. 9564 -1. 3289  
 C -2. 83645 1. 76844 -0. 40157  
 C -3. 92201 1. 050536 0. 087734  
 C -3. 79249 -0. 35226 0. 177097  
 C -2. 62357 -0. 98991 -0. 24377  
 C -5. 20042 1. 722392 0. 520243  
 C 2. 760385 2. 335987 1. 069172  
 C 2. 592053 0. 131662 2. 151947  
 H 0. 410352 0. 614651 0. 862622  
 O 0. 925589 -1. 84934 0. 47957  
 O 4. 929425 0. 363071 0. 585104  
 O 3. 683461 -2. 05218 0. 162043  
 O -4. 88518 -1. 0063 0. 678546  
 C -4. 82604 -2. 41698 0. 810649  
 H 4. 326648 -1. 12994 -1. 57252  
 H 3. 777812 1. 099682 -0. 98724  
 H 2. 071864 -2. 18513 -1. 8928  
 H 2. 140536 -0. 47963 -2. 35197  
 H 1. 576376 2. 267371 -1. 36887

### 2β10β10 (5.39 %)

C 3. 032259 1. 625254 0. 350364  
 C 3. 801572 0. 294135 0. 402903  
 C 2. 884207 -0. 94209 0. 560722  
 C 1. 725556 -0. 88272 -0. 52064  
 C 0. 989988 0. 479051 -0. 68845  
 C 2. 016511 1. 620846 -0. 78159  
 C 0. 814986 -2. 08031 -0. 41482  
 C -0. 51459 -2. 20574 -0. 22704  
 C -1. 59878 -1. 22921 -0. 05686  
 C -1. 42632 0. 146656 0. 200327  
 C -0. 06536 0. 769409 0. 417941  
 C -2. 91931 -1. 71831 -0. 16982  
 C -4. 0492 -0. 9203 -0. 06033  
 C -3. 84946 0. 455534 0. 174414  
 C -2. 55758 0. 968428 0. 299577  
 C -5. 44419 -1. 47606 -0. 1898  
 C 2. 382793 -1. 00973 2. 020957  
 C 3. 745685 -2. 20397 0. 319172  
 H 2. 256138 -0. 99406 -1. 47736  
 O 0. 356292 0. 512498 -1. 97346  
 O 4. 57234 0. 169283 -0. 78536  
 O 3. 960327 2. 688552 0. 064861  
 O -4. 98783 1. 205688 0. 267243  
 C -4. 86499 2. 601493 0. 489208  
 H 2. 541664 1. 817515 1. 314827  
 H 4. 479557 0. 319248 1. 278824  
 H 2. 555588 1. 503053 -1. 72652  
 H 1. 495569 2. 582854 -0. 82508  
 H 1. 337864 -3. 02513 -0. 55112

|                              |                              |                              |
|------------------------------|------------------------------|------------------------------|
| H -0.87827 -3.22938 -0.24531 | H -0.69326 2.808107 -1.89291 | H -0.88256 -3.2319 -0.24741  |
| H -0.20541 1.865736 0.459253 | H -0.54793 -2.02467 -1.4402  | H -0.19823 1.855044 0.485052 |
| H 0.31534 0.466015 1.37838   | H -0.17481 -0.5478 -2.33327  | H 0.31838 0.443036 1.389827  |
| H -3.05325 -2.78563 -0.3487  | H -2.91621 2.85213 -0.46788  | H -3.05856 -2.78102 -0.35901 |
| H -2.41501 2.027442 0.471215 | H -2.53882 -2.07005 -0.20287 | H -2.4083 2.026193 0.485942  |
| H -5.41392 -2.56721 -0.3526  | H -5.13737 2.805825 0.379111 | H -5.41844 -2.5553 -0.36833  |
| H -6.02941 -1.29915 0.72809  | H -6.06091 1.349958 -0.0485  | H -6.03359 -1.29022 0.715986 |
| H -5.98949 -1.01918 -1.00573 | H -5.41835 1.525112 1.576814 | H -5.98731 -1.00277 -1.0165  |
| H 1.607739 -1.77329 2.131898 | H 1.910979 2.734067 1.63548  | H 1.611867 -1.77897 2.129879 |
| H 3.205846 -1.25561 2.693312 | H 3.665547 2.472025 1.669326 | H 3.213784 -1.27106 2.687033 |
| H 1.953977 -0.05918 2.387723 | H 2.87036 2.943497 0.165432  | H 1.965239 -0.06745 2.388336 |
| H 4.653228 -2.14838 0.938769 | H 3.5742 0.262702 2.615673   | H 4.652413 -2.16056 0.934178 |
| H 3.211373 -3.10097 0.614189 | H 1.848535 0.600939 2.806531 | H 3.205297 -3.11401 0.598944 |
| H 4.037298 -2.29021 -0.72431 | H 2.356273 -0.92866 2.112131 | H 4.059444 -2.28399 -0.7246  |
| H -0.37054 -0.13659 -1.9686  | H 1.833343 -2.17472 0.626833 | H -0.36263 -0.14035 -1.96443 |
| H 5.294775 -0.33602 -0.67876 | H 5.664936 0.392004 -0.04727 | H 4.874717 1.074494 -0.98431 |
| H 4.547274 2.453727 -0.48837 | H 4.357836 -1.71767 0.782277 | H 4.514796 2.814687 0.852138 |
| H -5.89413 2.980071 0.516078 | H -5.78202 -2.71741 1.244246 | H -5.88455 2.990514 0.517796 |
| H -4.37354 2.811951 1.43726  | H -4.01047 -2.72598 1.477363 | H -4.36819 2.816042 1.444605 |
| H -4.32483 3.085426 -0.33033 | H -4.6994 -2.90937 -0.16275  | H -4.31165 3.091637 -0.32243 |

### 2β10β13 (1.93%)

C 3.536821 -0.9995 -0.80997  
 C 3.716756 0.38007 -0.15941  
 C 2.552399 0.844944 0.771438  
 C 1.163765 0.58957 0.07158  
 C 1.001632 -0.84509 -0.54553  
 C 2.177798 -1.14858 -1.49401  
 C 0.78228 1.664785 -0.93271  
 C -0.49202 1.946847 -1.25939  
 C -1.63747 1.152382 -0.79236  
 C -1.5412 -0.25335 -0.73566  
 C -0.33509 -0.95461 -1.32408  
 C -2.84214 1.76429 -0.40379  
 C -3.92632 1.044285 0.085684  
 C -3.79342 -0.35795 0.177291  
 C -2.6223 -0.99317 -0.24119  
 C -5.20673 1.713653 0.516071

### 2β10β19 (9.57%)

C 3.03024 1.645495 0.358409  
 C 3.794289 0.316461 0.417659  
 C 2.878235 -0.9279 0.564291  
 C 1.724903 -0.87551 -0.52207  
 C 0.988718 0.48558 -0.69907  
 C 2.0179 1.625079 -0.78853  
 C 0.817501 -2.07598 -0.41665  
 C -0.51166 -2.20256 -0.22749  
 C -1.59724 -1.22775 -0.05809  
 C -1.42782 0.150054 0.19196  
 C -0.06904 0.780141 0.402898  
 C -2.91661 -1.72166 -0.16478  
 C -4.04864 -0.92684 -0.05557  
 C -3.85234 0.450759 0.172206  
 C -2.56161 0.9683 0.290771  
 C -5.44231 -1.48743 -0.178

### 2β10β20 (3.59%)

C -3.52761 1.311417 -0.47511  
 C -3.55687 0.325782 0.723978  
 C -2.90619 -1.03813 0.376455  
 C -1.37383 -0.84257 0.046214  
 C -1.02281 0.580646 -0.55792  
 C -2.20549 1.223816 -1.28766  
 C -0.78309 -2.04485 -0.67308  
 C 0.52768 -2.29113 -0.85043  
 C 1.615313 -1.3542 -0.54401  
 C 1.466462 0.022606 -0.80122  
 C 0.21529 0.540354 -1.4749  
 C 2.838347 -1.81225 -0.02128  
 C 3.885645 -0.95813 0.306135  
 C 3.701854 0.423418 0.080743  
 C 2.511041 0.900789 -0.47421  
 C 5.183496 -1.46384 0.882092

|                                 |                                 |                                 |
|---------------------------------|---------------------------------|---------------------------------|
| C 2. 761383 2. 350814 1. 059883 | C 2. 37504 -1. 00138 2. 023591  | C -3. 71301 -1. 65817 -0. 79282 |
| C 2. 598532 0. 159055 2. 159167 | C 3. 742199 -2. 18902 0. 324547 | C -3. 03273 -1. 97457 1. 594299 |
| H 0. 405283 0. 622283 0. 864612 | H 2. 258314 -0. 9867 -1. 47793  | H -0. 8639 -0. 82386 1. 019875  |
| O 0. 930479 -1. 84541 0. 477007 | O 0. 358598 0. 505829 -1. 9864  | O -0. 71192 1. 481241 0. 542859 |
| O 4. 99019 0. 442176 0. 472027  | O 4. 569326 0. 293962 -0. 79538 | O -2. 99536 0. 94796 1. 882053  |
| O 3. 726515 -1. 99051 0. 236595 | O 3. 945829 2. 725298 0. 228097 | O -3. 78923 2. 626155 -0. 01492 |
| O -4. 88518 -1. 01408 0. 678479 | O -4. 99234 1. 197587 0. 265195 | O 4. 758837 1. 21612 0. 427021  |
| C -4. 82264 -2. 42407 0. 813591 | C -4. 87335 2. 594914 0. 482256 | C 4. 657048 2. 615861 0. 215484 |
| H 4. 347541 -1. 1206 -1. 54103  | H 2. 522764 1. 810151 1. 314977 | H -4. 34928 1. 052782 -1. 15336 |
| H 3. 772622 1. 094754 -0. 99122 | H 4. 479352 0. 35116 1. 278919  | H -4. 60326 0. 146859 0. 996468 |
| H 2. 068836 -2. 16167 -1. 90567 | H 2. 561484 1. 50449 -1. 73203  | H -1. 93114 2. 240793 -1. 58476 |
| H 2. 148557 -0. 45394 -2. 34341 | H 1. 49736 2. 587203 -0. 83811  | H -2. 37439 0. 651702 -2. 20811 |
| H 1. 569907 2. 273611 -1. 36926 | H 1. 340253 -3. 02124 -0. 55372 | H -1. 47193 -2. 82823 -0. 97292 |
| H -0. 70069 2. 805549 -1. 89794 | H -0. 87819 -3. 2293 -0. 24623  | H 0. 820191 -3. 26439 -1. 24503 |
| H -0. 54161 -2. 02427 -1. 43158 | H -0. 20547 1. 865659 0. 459895 | H 0. 385648 1. 558918 -1. 84087 |
| H -0. 17393 -0. 54933 -2. 32998 | H 0. 315405 0. 465702 1. 378509 | H -0. 01929 -0. 08973 -2. 34078 |
| H -2. 9246 2. 847617 -0. 4719   | H -3. 05319 -2. 7857 -0. 34847  | H 2. 966046 -2. 87956 0. 148915 |
| H -2. 53515 -2. 07311 -0. 19855 | H -2. 41502 2. 027276 0. 471979 | H 2. 389417 1. 957063 -0. 68973 |
| H -5. 14634 2. 796932 0. 372899 | H -5. 41391 -2. 56756 -0. 35078 | H 5. 165616 -2. 55291 0. 984949 |
| H -6. 06586 1. 337839 -0. 05247 | H -6. 02957 -1. 29839 0. 728486 | H 6. 034559 -1. 1903 0. 247289  |
| H -5. 42471 1. 51785 1. 572899  | H -5. 98922 -1. 02022 -1. 00565 | H 5. 379101 -1. 0273 1. 868746  |
| H 1. 92902 2. 75075 1. 650264   | H 1. 607669 -1. 77444 2. 131014 | H -3. 52663 -2. 73264 -0. 88474 |
| H 3. 686057 2. 489381 1. 62861  | H 3. 205713 -1. 25701 2. 692733 | H -4. 78731 -1. 54338 -0. 60568 |
| H 2. 846033 2. 954617 0. 151412 | H 1. 953853 -0. 06044 2. 387811 | H -3. 49375 -1. 2022 -1. 76302  |
| H 3. 57323 0. 328999 2. 628626  | H 4. 65301 -2. 1489 0. 937884   | H -4. 08514 -2. 21024 1. 794938 |
| H 1. 839264 0. 60901 2. 808985  | H 3. 211192 -3. 10121 0. 612208 | H -2. 50531 -2. 91998 1. 419913 |
| H 2. 407498 -0. 91121 2. 13657  | H 4. 037568 -2. 28938 -0. 72545 | H -2. 61912 -1. 50371 2. 490608 |
| H 1. 846407 -2. 09778 0. 690773 | H -0. 37157 -0. 13441 -1. 96829 | H 0. 153139 1. 205163 0. 895858 |
| H 5. 060856 -0. 37651 0. 991769 | H 5. 295766 -0. 33469 -0. 67794 | H -2. 0669 1. 179999 1. 655915  |
| H 3. 962467 -2. 83036 -0. 18706 | H 4. 547315 2. 453585 -0. 48735 | H -3. 53028 2. 616669 0. 926277 |
| H -5. 77829 -2. 72611 1. 246794 | H -5. 89416 2. 980427 0. 512633 | H 5. 599333 3. 040241 0. 566543 |
| H -4. 00703 -2. 72972 1. 481918 | H -4. 37438 2. 813951 1. 435372 | H 3. 827336 3. 050815 0. 787967 |
| H -4. 69373 -2. 91835 -0. 15862 | H -4. 32418 3. 083966 -0. 33274 | H 4. 525316 2. 854499 -0. 84793 |

**Table S12.** <sup>1</sup>H NMR spectroscopic data of compounds **1–6**.

|       | <b>1</b> <sup>a</sup>         | <b>2</b> <sup>b</sup>         | <b>3</b> <sup>b</sup>         | <b>4</b> <sup>c</sup>         | <b>5</b> <sup>b</sup>         | <b>6</b> <sup>a</sup>         |
|-------|-------------------------------|-------------------------------|-------------------------------|-------------------------------|-------------------------------|-------------------------------|
| No.   | $\delta_{\text{H}}$ (J in Hz) |
| 1     | 2.42 br d (13.2)              | 2.16 td (14.2, 4.4)           | 2.52 td (14.0, 4.3)           | 2.39 m                        | 1.98 m                        | 2.25 dd (14.5, 3.7)           |
|       | 2.28 td (13.2, 5.4)           | 1.88 m                        | 1.59 m                        | 2.25 m                        | 1.98 m                        | 1.95 d (14.5, 2.0)            |
| 2     | 2.10 m                        | 1.88 m                        | 2.01 m                        | 1.97 m                        | 2.24 m                        | 4.00 ddd (3.7, 3.0, 2.0)      |
|       | 2.05 m                        | 1.73 m                        | 1.85 m                        | 1.97 m                        | 1.50 m                        |                               |
| 3     | 3.81 br s                     | 3.40 dd (11.7, 3.4)           | 3.62 br s                     | 3.62 m                        | 3.88 t (8.0)                  | 3.63 br d (3.0)               |
| 5     | 2.94 br s                     | 0.91 d (2.4)                  | 1.29 d (3.6)                  | 2.37 m                        | 1.56 d (6.2)                  | 2.39 dd (4.6, 2.2)            |
| 6     | 5.90 br d (9.8)               | 4.21 m                        | 4.15 m                        | 1.75 m                        | 4.44 t (6.2)                  | 5.85 dd (12.0, 4.6)           |
|       |                               |                               |                               | 1.56 m                        |                               |                               |
| 7     | 6.60 dd (9.8, 2.9)            | 4.72 d (4.4)                  | 4.71 d (4.3)                  | 2.89 m                        | 4.72 d (6.2)                  | 6.61 dd (12.0, 2.2)           |
|       |                               |                               |                               | 2.37 m                        |                               |                               |
| 11    | 6.93 s                        | 6.67 s                        | 6.73 s                        | 4.31 br d (8.0)               | 6.58 s                        | 6.58 s                        |
| 12    |                               |                               |                               | 4.05 br s                     |                               |                               |
| 14    | 6.89 s                        | 7.12 s                        | 7.11 s                        | 5.35 s                        | 6.85 s                        | 6.96 s                        |
| 15    | 2.18 s                        | 2.22 s                        | 2.21 s                        | 5.91 dd (17.4, 10.4)          | 2.18 s                        | 2.18 s                        |
| 16    |                               |                               |                               | 5.21 d (17.4)                 |                               |                               |
|       |                               |                               |                               | 5.11 d (10.4)                 |                               |                               |
| 17    |                               |                               |                               | 1.36 s                        |                               |                               |
| 18    | 1.19 s                        | 1.14 s                        | 1.11 s                        | 1.29 s                        | 1.03 s                        | 1.03 s                        |
| 19    | 4.37 d (12.2)                 | 1.14 s                        | 1.17 s                        | 1.16 s                        | 1.10 s                        | 1.25 s                        |
|       | 4.04 dd (12.2, 1.7)           |                               |                               |                               |                               |                               |
| 20    |                               | 4.07 d (8.5)                  | 4.11 d (8.5)                  | 1.08 s                        | 2.98 d (16.3)                 | 2.95 d (14.0)                 |
|       |                               | 2.72 d (8.5)                  | 2.75 d (8.5)                  |                               | 2.55 d (16.3)                 | 2.68 d (14.0)                 |
| OMe   | 3.88 s                        | 3.86 s                        | 3.86 s                        |                               | 3.80 s                        | 3.84 s                        |
| 3-OH  |                               |                               |                               | 5.75 br d (4.6)               |                               |                               |
| 9-OH  |                               |                               |                               | 4.79 br s                     |                               |                               |
| 11-OH |                               |                               |                               | 5.15 overlapped               |                               |                               |
| 12-OH |                               |                               |                               | 6.87 br s                     |                               |                               |

<sup>a</sup> Spectra recorded at 400 MHz in CDCl<sub>3</sub>; <sup>b</sup> Spectra recorded at 500 MHz in CDCl<sub>3</sub>; <sup>c</sup> Spectra recorded at 400 MHz in pyridine-*d*<sub>5</sub>.
